# Supplementary material for: Diastereoselective synthesis of polycyclic indolinesviadearomative [4 + 2] cycloaddition of 3-nitroindoles withortho-aminophenylp-quinone methides
Source: Royal Society of Chemistry journal article supplement (doi:10.1039/d2ob02303b), 2023-01-01

## Diastereoselective synthesis of polycyclic indolines via dearomative

### [4+2] cycloaddition of 3-nitroindoles with *ortho*-aminophenyl

#### *p*-quinone methides

Shun Zhou,<sup>abd</sup> Hui-Ling Qian,<sup>b</sup> Jian-Qiang Zhao,<sup>\*b</sup> Yong You,<sup>b</sup> Zhen-Hua Wang,<sup>b</sup> Jun-Qing Yin,<sup>b</sup>  
Yan-Ping Zhang,<sup>b</sup> Ming-Feng Chen,<sup>c</sup> and Wei-Cheng Yuan<sup>\*ab</sup>

<sup>a</sup>National Engineering Research Center of Chiral Drugs, Chengdu Institute of Organic Chemistry,  
Chinese Academy of Sciences, Chengdu, 610041, China.

<sup>b</sup>Innovation Research Center of Chiral Drugs, Institute for Advanced Study, Chengdu University,  
Chengdu 610106, China.

<sup>c</sup>Zhejiang Nexchem Pharmaceutical Co., Ltd., Jinhua, 321016, China

<sup>d</sup>University of Chinese Academy of Sciences, Beijing, 100049, China

E-mail: zhaojianqiang@cdu.edu.cn; yuanwc@cioc.ac.cn

## Supporting Information

### Table of Contents

|                                                                                             |     |
|---------------------------------------------------------------------------------------------|-----|
| 1. General experimental information.....                                                    | S1  |
| 2. General procedure for the synthesis of <b>3</b> .....                                    | S1  |
| 3. Scale-up reaction for the synthesis of <b>3</b> .....                                    | S9  |
| 4. Synthesis of compound <b>4</b> .....                                                     | S10 |
| 5. Optimization of conditions for catalytic asymmetric version.....                         | S12 |
| 6. X-ray crystal structure of compound <b>3a</b> .....                                      | S12 |
| 7. Determination of the absolute configuration of <b>3a</b> by ECD spectrum.....            | S13 |
| 8. <sup>1</sup> H and <sup>13</sup> C NMR spectra for compounds <b>3</b> and <b>4</b> ..... | S15 |

## 1. General experimental information

Reagents were purchased from commercial sources and were used as received unless mentioned otherwise. Reactions were monitored by TLC.  $^1\text{H}$  NMR and  $^{13}\text{C}$  NMR spectra were recorded in  $\text{CDCl}_3$  or  $\text{DMSO-}d_6$ .  $^1\text{H}$  NMR chemical shifts are reported in ppm relative to tetramethylsilane (TMS) with the solvent resonance employed as the internal standard ( $\text{CDCl}_3$  at 7.26 ppm,  $\text{DMSO-}d_6$  at 2.50 ppm). Data are reported as follows: chemical shift, multiplicity (s = singlet, br s = broad singlet, d = doublet, t = triplet, q = quartet, m = multiplet), coupling constants (Hz) and integration.  $^{13}\text{C}$  NMR chemical shifts are reported in ppm from tetramethylsilane (TMS) with the solvent resonance as the internal standard ( $\text{CDCl}_3$  at 77.16 ppm,  $\text{DMSO-}d_6$  at 39.52 ppm). The enantiomeric excesses were determined by chiral HPLC analysis. HPLC analysis was performed on Shimadzu SCL-10AVP HPLC systems and Agilent 1260 Infinity II consisting of the followings: pump, LC-10AD and G7129A; detector, SPD-10A and G7114A measured at 254 nm. Melting points products were recorded on a Büchi Melting Point B-545. The HRMS were recorded by Agilent 6545 LC/Q-TOF mass spectrometer.

## 2. General procedure for the synthesis of 3

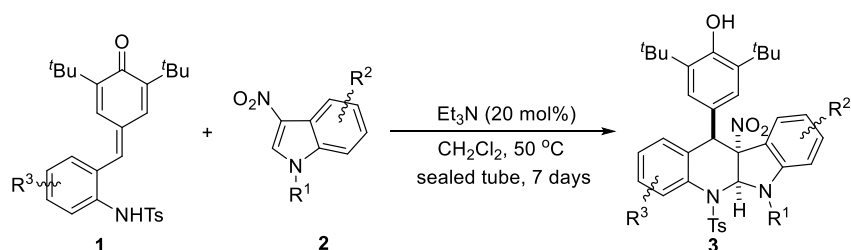

In a sealed tube equipped with a magnetic stirring bar, the 3-nitroindoles **1** (0.05 mmol, 1 equiv), *ortho*-tosylaminophenyl *p*-QMs **2** (0.05 mmol, 1.0 equiv), triethylamine (20 mol%) and dichloromethane (0.5 mL) were added. And then, the mixture was stirred at 50 °C for 7 days. After completion of the reaction as indicated by TLC, the products **3** were isolated by flash chromatography on silica gel (petroleum ether/ethyl acetate = 10/1 ~ 5/1).

### 2,6-di-*tert*-butyl-4-(10*b*-nitro-5,6-ditosyl-5*a*,6,10*b*,11-tetrahydro-5*H*-indolo[2,3-*b*]quinolin-11-yl)phenol (3a)

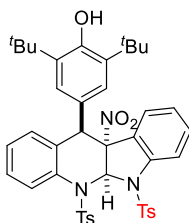

It was purified by flash chromatography (petroleum ether / EtOAc, 8:1) to afford white solid (33.5 mg, 86% yield); m.p. 226.3-227.1 °C; 91:9 er. The er was determined by HPLC, Chiralpak IA, *i*-PrOH/hexane = 20/80, flow rate 1.0 mL/min,  $\lambda = 254$  nm,  $t_{\text{major}} = 10.5$  min,  $t_{\text{minor}} = 13.2$  min.

$^1\text{H}$  NMR (400 MHz,  $\text{CDCl}_3$ )  $\delta$  7.79 (d,  $J = 7.9$  Hz, 2H), 7.65 (d,  $J = 8.0$  Hz, 3H), 7.58 (d,  $J = 7.9$  Hz, 1H), 7.41 – 7.21 (m, 5H),  $\delta$  7.17 (d,  $J = 8.0$  Hz, 2H), 7.12 – 7.02 (m, 2H), 6.86 (m, 1H), 6.70 (d,  $J = 7.9$  Hz, 1H), 6.55 (s, 2H), 5.31 (s, 1H), 3.82 (s, 1H), 2.38 (s, 3H), 2.36 (s, 3H), 1.37 (s, 18H).

$^{13}\text{C}$  NMR (101 MHz,  $\text{CDCl}_3$ )  $\delta$  154.4, 145.2, 144.3, 143.8, 136.1, 135.2, 134.6, 133.5, 132.0, 131.9, 131.1, 130.0, 129.3, 128.8, 128.5, 128.1, 127.9, 127.8, 127.5, 122.6, 121.1, 120.3, 115.0, 104.6, 81.6, 51.8, 34.4, 30.3, 27.0, 21.8, 21.8.

HRMS (ESI-TOF) calcd. for  $\text{C}_{43}\text{H}_{45}\text{N}_3\text{O}_7\text{S}_2\text{Na}$   $[\text{M} + \text{Na}]^+$  802.2591; found: 802.2612.

**2,6-di-*tert*-butyl-4-(10b-nitro-6-(phenylsulfonyl)-5-tosyl-5a,6,10b,11-tetrahydro-5H-indolo[2,3-b]quinolin-11-yl)phenol (3b)**

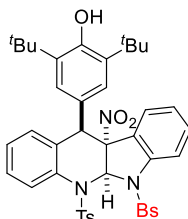

It was purified by flash chromatography (petroleum ether / EtOAc, 8:1) to afford white solid (29.1 mg, 76% yield); m.p. 242.5-243.5  $^{\circ}\text{C}$ ;

$^1\text{H}$  NMR (400 MHz,  $\text{DMSO}-d_6$ )  $\delta$  7.84 (d,  $J = 7.9$  Hz, 2H), 7.75 (q,  $J = 6.9, 6.1$  Hz, 1H), 7.69 – 7.56 (m, 3H), 7.51 (d,  $J = 8.4$  Hz, 1H), 7.47 – 7.38 (m, 3H), 7.37 – 7.28 (m, 5H), 7.26 – 7.18 (m, 2H), 7.07 – 6.95 (m, 2H), 6.74 (d,  $J = 7.9$  Hz, 1H), 3.52 (s, 1H), 2.31 (s, 3H), 1.99 (s, 1H), 1.31 (s, 18H).

$^{13}\text{C}$  NMR (101 MHz,  $\text{DMSO}-d_6$ )  $\delta$  155.1, 145.1, 143.3, 136.6, 135.2, 135.1, 134.2, 133.0, 132.9, 131.6, 131.1, 130.7, 130.3, 130.0, 129.2, 128.2, 128.1, 127.6, 127.4, 127.3, 123.3, 120.5, 119.9, 114.7, 104.3, 81.8, 51.7, 34.9, 30.5, 21.6.

HRMS (ESI-TOF) calcd. for  $\text{C}_{42}\text{H}_{43}\text{N}_3\text{O}_7\text{S}_2\text{Na}$   $[\text{M} + \text{Na}]^+$  788.2435; found: 788.2439.

**1-(11-(3,5-di-*tert*-butyl-4-hydroxyphenyl)-10b-nitro-5-tosyl-5a,10b,11-tetrahydro-6H-indolo[2,3-b]quinolin-6-yl)ethan-1-one (3c)**

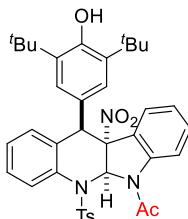

It was purified by flash chromatography (petroleum ether / EtOAc, 8:1) to afford white solid (24.7 mg, 74% yield); m.p. 220.7-221.4  $^{\circ}\text{C}$ ; 81:19 er. The er was determined by HPLC, Chiralpak IA, *i*-PrOH/hexane = 20/80, flow rate 1.0 mL/min,  $\lambda = 254$  nm,  $t_{\text{major}} = 17.4$  min,  $t_{\text{minor}} = 36.2$  min.

$^1\text{H}$  NMR (400 MHz,  $\text{CDCl}_3$ )  $\delta$  8.11 (d,  $J = 8.4$  Hz, 1H), 7.78 (dd,  $J = 7.9, 1.3$  Hz, 1H), 7.52 (d,  $J = 7.8$  Hz, 2H),  $\delta$  7.41 – 7.33 (m, 2H), 7.32 – 7.21 (m, 1H), 7.21 – 7.13 (m, 3H), 7.09 (dt,  $J = 7.9, 1.3$  Hz, 1H), 6.87 (td,  $J = 7.6, 1.1$  Hz, 1H), 6.80 (dd,  $J = 8.0, 1.5$  Hz, 1H), 6.51 (s, 2H), 5.33 (s, 1H), 3.63 (s, 1H), 2.79 (s, 3H), 2.36 (s, 3H), 1.39 (s, 18H).

$^{13}\text{C}$  NMR (101 MHz,  $\text{CDCl}_3$ )  $\delta$  170.3, 154.4, 144.7, 144.7, 135.8, 134.7, 133.8, 132.4, 131.8, 130.6, 129.3, 128.8, 128.7, 128.5, 128.1, 127.7, 122.9, 122.0, 119.9, 119.3, 116.1, 104.7, 80.8, 52.0, 34.3, 30.2, 25.5, 21.7.

HRMS (ESI-TOF) calcd. for  $\text{C}_{38}\text{H}_{41}\text{N}_3\text{O}_6\text{SNa}$   $[\text{M} + \text{Na}]^+$  690.2608; found: 690.2603.

**methyl 11-(3,5-di-*tert*-butyl-4-hydroxyphenyl)-10b-nitro-5-tosyl-5a,10b,11-**

**tetrahydro-6H-indolo[2,3-b]quinoline-6-carboxylate (3d)**

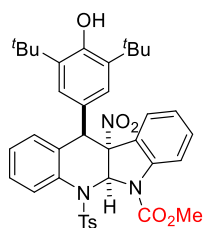

It was purified by flash chromatography (petroleum ether / EtOAc, 8:1) to afford white solid (29.4 mg, 86% yield); m.p. 223.7-224.6 °C;

**<sup>1</sup>H NMR (400 MHz, CDCl<sub>3</sub>)** δ 7.76 (dd, *J* = 14.4, 8.1 Hz, 2H), 7.65 – 7.58 (m, 2H), 7.41 – 7.03 (m, 7H), 6.91 – 6.80 (m, 2H), 6.63(s, 2H), 5.31 (s, 1H), 4.05 (d, *J* = 1.5 Hz, 3H), 3.78 (s, 1H), 2.32 (s, 3H), 1.39 (s, 18H).

**<sup>13</sup>C NMR (101 MHz, CDCl<sub>3</sub>)** δ 154.4, 152.5, 144.1, 144.0, 135.7, 134.2, 131.9, 131.8, 131.0, 129.1, 128.6, 128.4, 128.0, 127.9, 127.8, 127.3, 121.4, 120.1, 119.2, 114.1, 104.4, 79.7, 53.3, 52.2, 34.4, 30.2, 21.7.

**HRMS (ESI-TOF)** calcd. for C<sub>38</sub>H<sub>41</sub>N<sub>3</sub>O<sub>7</sub>Na [M + Na]<sup>+</sup> 706.2557; found: 706.2567.

**benzyl-11-(3,5-di-*tert*-butyl-4-hydroxyphenyl)-10b-nitro-5-tosyl-5,5a,10b,11-tetrahydro-6H-indolo[2,3-b]quinoline-6-carboxylate (3e)**

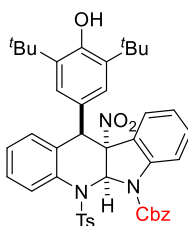

It was purified by flash chromatography (petroleum ether / EtOAc, 8:1) to afford white solid (26.6 mg, 70% yield); m.p. 193.9-195.0 °C;

**<sup>1</sup>H NMR (400 MHz, CDCl<sub>3</sub>)** δ 7.73 (dd, *J* = 8.3, 2.2 Hz, 1H), 7.72 – 7.64 (m, 3H), 7.60 (d, *J* = 8.1 Hz, 2H), 7.48 – 7.33 (m, 4H), 7.33 – 7.17 (m, 2H), 7.17 – 7.03 (m, 4H), 6.89 – 6.78 (m, 2H), 6.62 (s, 2H), 5.52 (d, *J* = 11.9 Hz, 1H), 5.46 (d, *J* = 11.9 Hz, 1H), 5.31 (s, 1H), 3.75 (s, 1H), 2.33 (s, 3H), 1.39 (s, 18H).

**<sup>13</sup>C NMR (101 MHz, CDCl<sub>3</sub>)** δ 154.4, 151.9, 144.0, 135.9, 135.8, 134.3, 131.9, 131.8, 130.9, 129.6, 129.4, 129.1, 128.7, 128.5, 128.4, 128.2, 127.9, 127.8, 127.3, 127.3, 121.4, 120.2, 119.3, 114.3, 104.4, 79.8, 68.2, 52.2, 34.3, 30.2, 21.6.

**HRMS (ESI-TOF)** calcd. for C<sub>44</sub>H<sub>45</sub>N<sub>3</sub>O<sub>7</sub>Na [M + Na]<sup>+</sup> 782.2870; found: 782.2880.

***tert*-butyl-11-(3,5-di-*tert*-butyl-4-hydroxyphenyl)-10b-nitro-5-tosyl-5,5a,10b,11-tetrahydro-6H-indolo[2,3-b]quinoline-6-carboxylate (3f)**

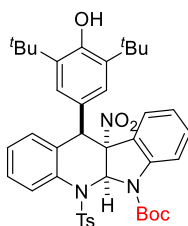



It was purified by flash chromatography (petroleum ether / EtOAc, 8:1) to afford white solid (30.5 mg, 84% yield); m.p. 215.8-216.5 °C;

**<sup>1</sup>H NMR (400 MHz, CDCl<sub>3</sub>)** δ 7.77 (dd, *J* = 12.3, 8.1 Hz, 2H), 7.55 (d, *J* = 7.9 Hz, 2H), 7.36 – 7.18 (m, 3H), 7.16 – 7.00 (m, 4H), 6.80 (d, *J* = 4.3 Hz, 2H), 6.64 (s, 2H), 5.30 (s, 1H), 3.69 (s, 1H), 2.32 (s, 3H), 1.75 (s, 9H), 1.39 (s, 18H).

**<sup>13</sup>C NMR (101 MHz, CDCl<sub>3</sub>)** δ 154.3, 151.1, 144.5, 143.9, 135.7, 134.4, 132.2, 131.7, 130.8, 129.1, 128.7, 128.5, 128.3, 127.9, 127.8, 127.4, 120.9, 120.2, 119.0, 114.1, 104.4, 84.0, 80.0, 52.2, 34.3, 30.2, 28.6, 21.7.

**HRMS (ESI-TOF)** calcd. for C<sub>41</sub>H<sub>47</sub>N<sub>3</sub>O<sub>7</sub>SNa [M + Na]<sup>+</sup> 748.3027; found: 748.3036.

**2,6-di-*tert*-butyl-4-(9-fluoro-10b-nitro-5,6-ditosyl-5a,6,10b,11-tetrahydro-5H-indolo[2,3-b]quinolin-11-yl)phenol (3g)**

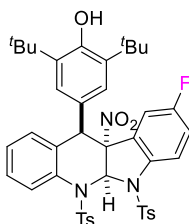

It was purified by flash chromatography (petroleum ether / EtOAc, 8:1) to afford yellow solid (29.1 mg, 73% yield); m.p. 209.3-210.2 °C; 84.5:15.5 er. The er was determined by HPLC, Chiralpak IC, *i*-PrOH/hexane = 20/80, flow rate 1.0 mL/min, λ = 254 nm, *t*<sub>major</sub> = 29.8 min, *t*<sub>minor</sub> = 33.6 min.

**<sup>1</sup>H NMR (400 MHz, CDCl<sub>3</sub>)** δ 7.81 – 7.72 (m, 2H), 7.72 – 7.63 (m, 2H), 7.67 – 7.57 (m, 2H), 7.34 – 7.23 (m, 4H), 7.22 – 6.95 (m, 5H), 6.63 (s, 2H), 6.47 (dd, *J* = 8.8, 2.8 Hz, 1H), 5.35 (s, 1H), 3.84 (s, 1H), 2.40 (s, 3H), 2.37 (s, 3H), 1.39 (s, 18H).

**<sup>13</sup>C NMR (101 MHz, CDCl<sub>3</sub>)** δ 158.0 (d, *J* = 242.4 Hz), 154.5, 145.3, 144.2, 139.82, 139.8, 135.9, 134.5, 132.9, 131.5, 130.0, 129.2, 128.6, 128.5, 128.5, 128.0, 127.9, 127.6, 127.4, 122.6 (d, *J* = 8.7 Hz), 119.7, 119.0 (d, *J* = 23.3 Hz), 117.9 (d, *J* = 26.1 Hz), 116.1 (d, *J* = 8.0 Hz), 103.9 (d, *J* = 2.0 Hz), 81.8, 51.8, 34.3, 30.1, 21.6.

**HRMS (ESI-TOF)** calcd. for C<sub>43</sub>H<sub>44</sub>FN<sub>3</sub>O<sub>7</sub>S<sub>2</sub>Na [M + Na]<sup>+</sup> 820.2497 found: 820.2514.

**2,6-di-*tert*-butyl-4-(8-fluoro-10b-nitro-5,6-ditosyl-5a,6,10b,11-tetrahydro-5H-indolo[2,3-b]quinolin-11-yl)phenol (3h)**

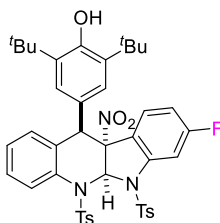

It was purified by flash chromatography (petroleum ether / EtOAc, 8:1) to afford yellow solid (28.7 mg, 82% yield); m.p. 202.2-203.1 °C; 83.5:16.5 er. The er was determined by HPLC, Chiralpak IA, *i*-PrOH/hexane = 20/80, flow rate 1.0 mL/min, λ = 254 nm, *t*<sub>major</sub> = 9.3 min, *t*<sub>minor</sub> = 15.2 min.

**<sup>1</sup>H NMR (400 MHz, CDCl<sub>3</sub>)** δ 7.89 – 7.81 (m, 2H), 7.67 – 7.58 (m, 2H), 7.55 (dd, *J* = 7.9, 1.3 Hz, 1H), 7.40 (dd, *J* = 10.0, 2.4 Hz, 1H), 7.36 – 7.22 (m, 4H), 7.21 – 7.03 (m, 4H), 6.69 (dd, *J* = 8.8, 5.7 Hz, 1H), 6.56 (m, 3H), 5.32 (s, 1H), 3.77 (s, 1H), 2.42 (s, 3H), 2.36 (s, 3H), 1.38 (s, 18H).

**<sup>13</sup>C NMR (101 MHz, CDCl<sub>3</sub>)** δ 164.9 (d, *J* = 250.6 Hz), 154.4, 145.5, 145.3, 144.2, 135.8, 134.3, 133.4, 132.5, 132.4, 131.6, 130.1, 129.2, 128.5, 128.5, 128.5, 128.0, 127.9, 127.7, 127.4, 120.0, 116.4 (d, *J* = 2.8 Hz), 109.7 (d, *J* = 22.9 Hz), 103.9, 102.6 (d, *J* = 28.7 Hz), 81.9, 51.6, 34.3, 30.2, 21.7, 21.6.

**HRMS (ESI-TOF)** calcd. for C<sub>43</sub>H<sub>44</sub>FN<sub>3</sub>O<sub>7</sub>S<sub>2</sub>Na [M + Na]<sup>+</sup> 820.2497; found: 820.2502.

**2,6-di-*tert*-butyl-4-(7-fluoro-10b-nitro-5,6-ditosyl-5a,6,10b,11-tetrahydro-5H-indolo[2,3-b]quinolin-11-yl)phenol (3i)**

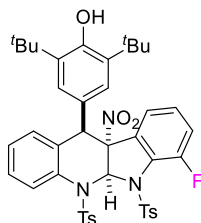

It was purified by flash chromatography (petroleum ether / EtOAc, 8:1) to afford white solid (21.9 mg, 55% yield); m.p. 215.6-216.5 °C;

**<sup>1</sup>H NMR (400 MHz, CDCl<sub>3</sub>)** δ 8.08 – 7.94 (m, 2H), 7.82 (s, 1H), 7.67 – 7.59 (m, 2H), 7.47 (dd, *J* = 7.9, 1.2 Hz, 1H), 7.41 – 7.33 (m, 2H), 7.27 – 7.15 (m, 3H), 7.08 – 6.95 (m, 3H), 6.85 (td, *J* = 8.0, 4.4 Hz, 1H), 6.73 (dd, *J* = 7.9, 1.2 Hz, 1H), 6.57 (s, 2H), 5.32 (s, 1H), 3.87 (s, 1H), 2.47 (s, 3H), 2.36 (s, 3H), 1.38 (s, 18H).

**<sup>13</sup>C NMR (101MHz, CDCl<sub>3</sub>)** δ 154.4, 150.0 (d, *J* = 251.6 Hz), 144.7, 144.4, 136.2, 135.4, 134.3, 132.0, 131.8, 131.6, 129.5, 129.3, 128.4, 128.3, 128.2, 128.2, 128.1, 127.9, 127.3, 126.4 (d, *J* = 3.7 Hz), 125.3, 123.6 (d, *J* = 6.6 Hz), 119.9, 119.3 (d, *J* = 19.8 Hz), 104.1 (d, *J* = 1.7 Hz), 82.4, 51.6, 34.4, 30.2, 21.7.

**HRMS (ESI-TOF)** calcd. for C<sub>43</sub>H<sub>44</sub>FN<sub>3</sub>O<sub>7</sub>S<sub>2</sub>Na [M + Na]<sup>+</sup> 820.2497; found: 820.2502.

**2,6-di-*tert*-butyl-4-(9-chloro-10b-nitro-5,6-ditosyl-5a,6,10b,11-tetrahydro-5H-indolo[2,3-b]quinolin-11-yl)phenol (3j)**

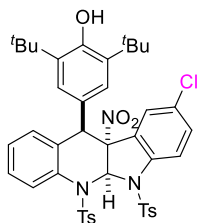

It was purified by flash chromatography (petroleum ether / EtOAc, 8:1) to afford yellow solid (31.7 mg, 78% yield); m.p. 232.8-233.7 °C; 79:21 er. The er was determined by HPLC, Chiralpak IA, *i*-PrOH/hexane = 20/80, flow rate 1.0 mL/min, λ = 254 nm, *t*<sub>major</sub> = 17.5 min, *t*<sub>minor</sub> = 27.4 min.

**<sup>1</sup>H NMR (400 MHz, CDCl<sub>3</sub>)** δ 7.78 (dd, *J* = 8.4, 2.0 Hz, 2H), 7.66 – 7.55 (m, 4H), 7.26 (m, 5H), 7.20 – 7.02 (m, 4H), 6.78 (d, *J* = 2.4 Hz, 1H), 6.40 (s, 2H), 5.33 (s, 1H), 3.76 (s, 1H), 2.39 (s, 3H), 2.34 (s, 3H), 1.39 (s, 18H).

$^{13}\text{C}$  NMR (101 MHz,  $\text{CDCl}_3$ )  $\delta$  154.5, 145.3, 144.3, 142.4, 136.1, 135.8, 134.4, 133.1, 132.1, 131.4, 130.6, 130.1, 129.3, 128.6, 128.5, 128.0, 127.9, 127.6, 127.3, 122.4, 120.9, 119.6, 117.8, 115.9, 103.9, 81.8, 51.8, 34.3, 30.1, 21.7.

HRMS (ESI-TOF) calcd. for  $\text{C}_{43}\text{H}_{44}\text{ClN}_3\text{O}_7\text{S}_2\text{Na}$   $[\text{M} + \text{Na}]^+$  836.2201; found: 836.2204.

**2,6-di-*tert*-butyl-4-(7-chloro-10b-nitro-5,6-ditosyl-5a,6,10b,11-tetrahydro-5H-indolo[2,3-b]quinolin-11-yl)phenol (3k)**

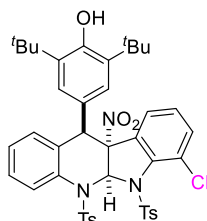

It was purified by flash chromatography (petroleum ether / EtOAc, 8:1) to afford white solid (18.3 mg, 45% yield); m.p. 225.7-226.4  $^{\circ}\text{C}$ ;

$^1\text{H}$  NMR (400 MHz,  $\text{CDCl}_3$ )  $\delta$  7.98 (d,  $J = 8.4$  Hz, 2H), 7.81 (s, 1H), 7.66 – 7.52 (m, 3H), 7.42 – 7.32 (m, 3H), 7.25 – 7.18 (m, 3H), 7.11 – 6.86 (m, 4H), 6.65 (s, 2H), 5.31 (s, 1H), 3.90 (s, 1H), 2.47 (s, 3H), 2.37 (s, 3H), 1.39 (s, 18H).

$^{13}\text{C}$  NMR (101 MHz,  $\text{CDCl}_3$ )  $\delta$  154.2, 152.8, 144.6, 144.4, 142.0, 136.0, 135.4, 134.1, 133.1, 132.2, 131.4, 129.5, 129.5, 128.4, 128.2, 128.1, 128.1, 127.9, 127.5, 127.4, 127.0, 125.1, 124.4, 124.2, 124.0, 120.2, 117.8, 103.6, 82.7, 51.3, 34.4, 30.2, 21.7.

HRMS (ESI-TOF) calcd. for  $\text{C}_{43}\text{H}_{44}\text{ClN}_3\text{O}_7\text{S}_2\text{Na}$   $[\text{M} + \text{Na}]^+$  836.2201; found: 836.2204.

**4-(10-bromo-10b-nitro-5,6-ditosyl-5a,6,10b,11-tetrahydro-5H-indolo[2,3-b]quinolin-11-yl)-2,6-di-*tert*-butylphenol (3l)**

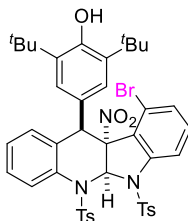

It was purified by flash chromatography (petroleum ether / EtOAc, 8:1) to afford white solid (19.8 mg, 46% yield); m.p. 240.6-241.3  $^{\circ}\text{C}$ ; 78.5:21.5 er. The er was determined by HPLC, Chiralpak IA, *i*-PrOH/hexane = 10/90, flow rate 1.0 mL/min,  $\lambda = 254$  nm,  $t_{\text{minor}} = 18.2$  min,  $t_{\text{major}} = 20.2$  min,.

$^1\text{H}$  NMR (400 MHz,  $\text{CDCl}_3$ )  $\delta$  7.93 – 7.86 (m, 2H), 7.71 (s, 1H), 7.65 – 7.60 (m, 2H), 7.57 (dd,  $J = 7.9, 1.3$  Hz, 1H), 7.49 – 7.28 (m, 3H), 7.27 – 7.11 (m, 3H), 7.06 (ddd,  $J = 7.5, 6.3, 1.3$  Hz, 2H), 6.98 (dt,  $J = 7.8, 1.4$  Hz, 1H), 6.94 – 6.82 (m, 1H), 6.60 (s, 2H), 5.30 (s, 1H), 3.88 (s, 1H), 2.45 (s, 3H), 2.37 (s, 3H), 1.39 (s, 18H).

$^{13}\text{C}$  NMR (101 MHz,  $\text{CDCl}_3$ )  $\delta$  154.3, 144.8, 144.4, 143.5, 136.3, 135.5, 135.3, 134.1, 132.1, 129.5, 128.7, 128.5, 128.4, 128.2, 128.2, 127.9, 127.9, 126.9, 125.6, 124.2, 124.0, 120.2, 117.8, 113.0, 103.7, 82.5, 51.6, 34.4, 30.2, 21.7.

HRMS (ESI-TOF) calcd. for  $\text{C}_{43}\text{H}_{44}\text{BrN}_3\text{O}_7\text{S}_2\text{Na}$   $[\text{M} + \text{Na}]^+$  880.1696; found: 880.1700,.

**4-(9-bromo-10b-nitro-5,6-ditosyl-5a,6,10b,11-tetrahydro-5H-indolo[2,3-b]quinolin-11-yl)-2,6-di-*tert*-butylphenol (3m)**

### -2,6-di-*tert*-butylphenol (3m)

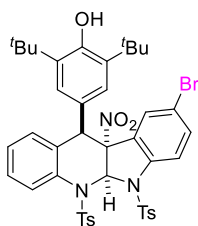

It was purified by flash chromatography (petroleum ether / EtOAc, 8:1) to afford white solid (35.2 mg, 82% yield); m.p. 232.8-233.5 °C; 80:20 er. The er was determined by HPLC, Chiralpak IC, *i*-PrOH/hexane = 20/80, flow rate 1.0 mL/min,  $\lambda = 254$  nm,  $t_{\text{major}} = 30.0$  min,  $t_{\text{minor}} = 33.3$  min.

**<sup>1</sup>H NMR (400 MHz, CDCl<sub>3</sub>)**  $\delta$  7.76 (dd,  $J = 8.4, 2.2$  Hz, 2H), 7.61 – 7.49 (m, 4H), 7.42 – 7.35 (m, 1H), 7.32 – 7.24 (m, 3H), 7.21 (d,  $J = 2.2$  Hz, 1H), 7.18 – 7.03 (m, 4H), 6.93 (d,  $J = 2.2$  Hz, 1H), 6.74 (s, 2H), 5.45 (s, 1H), 3.70 (s, 1H), 2.39 (s, 3H), 2.33 (s, 3H), 1.39 (s, 18H).

**<sup>13</sup>C NMR (101 MHz, CDCl<sub>3</sub>)**  $\delta$  154.5, 145.4, 144.3, 142.9, 135.7, 134.9, 134.3, 133.3, 133.2, 131.4, 130.1, 129.5, 129.2, 128.6, 128.4, 128.1, 128.0, 127.9, 127.5, 127.3, 122.7, 119.5, 116.2, 115.3, 103.9, 81.7, 51.7, 34.3, 30.1, 21.6.

**HRMS (ESI-TOF)** calcd. for C<sub>43</sub>H<sub>44</sub>BrN<sub>3</sub>O<sub>7</sub>S<sub>2</sub>Na [M + Na]<sup>+</sup> 880.1696, found: 880.1692.

### 4-(7-bromo-10b-nitro-5,6-ditosyl-5a,6,10b,11-tetrahydro-5H-indolo[2,3-b]quinolin-11-yl)-2,6-di-*tert*-butylphenol (3n)

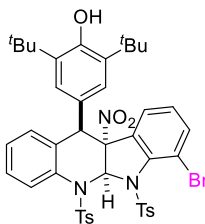

It was purified by flash chromatography (petroleum ether / EtOAc, 8:1) to afford white solid (20.7 mg, 48% yield); m.p. 230.4-231.0 °C;

**<sup>1</sup>H NMR (400 MHz, CDCl<sub>3</sub>)**  $\delta$  7.98 (d,  $J = 8.4$  Hz, 2H), 7.81 (s, 1H), 7.66 – 7.52 (m, 3H), 7.42 – 7.32 (m, 3H), 7.25 – 7.18 (m, 3H), 7.11 – 6.86 (m, 4H), 6.65 (s, 2H), 5.31 (s, 1H), 3.90 (s, 1H), 2.47 (s, 3H), 2.37 (s, 3H), 1.39 (s, 18H).

**<sup>13</sup>C NMR (101 MHz, CDCl<sub>3</sub>)**  $\delta$  154.3, 144.8, 144.4, 143.5, 136.3, 135.5, 135.3, 134.1, 132.1, 129.5, 128.7, 128.5, 128.4, 128.2, 128.2, 127.9, 127.8, 127.5, 126.9, 125.6, 124.0, 120.2, 117.8, 113.0, 103.7, 82.5, 51.6, 34.4, 30.2, 21.7.

**HRMS (ESI-TOF)** calcd. for C<sub>43</sub>H<sub>44</sub>BrN<sub>3</sub>O<sub>7</sub>S<sub>2</sub>Na [M + Na]<sup>+</sup> 880.1696, found: 880.1711.

### 11-(3,5-di-*tert*-butyl-4-hydroxyphenyl)-10b-nitro-5,6-ditosyl-5a,6,10b,11-tetrahydro-5H-indolo[2,3-b]quinoline-9-carbonitrile (3o)

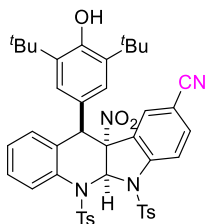

It was purified by flash chromatography (petroleum ether / EtOAc, 8:1) to afford white solid (28.6 mg, 71% yield); m.p. 184.5-185.3 °C;

**<sup>1</sup>H NMR (400 MHz, CDCl<sub>3</sub>)** δ 7.88 – 7.82 (m, 2H), 7.74 (d, *J* = 8.7 Hz, 1H), 7.58 (td, *J* = 8.9, 8.4, 1.7 Hz, 3H), 7.47 (dd, *J* = 8.0, 1.3 Hz, 1H), 7.34 – 7.28 (m, 4H), 7.20 – 7.05 (m, 5H), 6.52 (s, 2H), 5.38 (s, 1H), 3.71 (s, 1H), 2.43 (s, 3H), 2.35 (s, 3H), 1.40 (s, 18H).

**<sup>13</sup>C NMR (101 MHz, CDCl<sub>3</sub>)** δ 154.8, 147.2, 145.8, 144.5, 135.7, 135.6, 135.1, 134.2, 133.6, 131.0, 130.2, 129.3, 128.8, 128.5, 128.1, 128.0, 127.6, 127.4, 121.5, 119.3, 118.0, 114.9, 106.0, 103.4, 81.7, 51.7, 34.3, 30.1, 21.7, 21.7.

**HRMS (ESI-TOF)** calcd. for C<sub>44</sub>H<sub>44</sub>N<sub>4</sub>O<sub>7</sub>S<sub>2</sub>Na [M + Na]<sup>+</sup> 827.2544; found: 827.2549.

**2,6-di-*tert*-butyl-4-(9-methyl-10b-nitro-5,6-ditosyl-5a,6,10b,11-tetrahydro-5H-indolo[2,3-b]quinolin-11-yl)phenol (3p)**

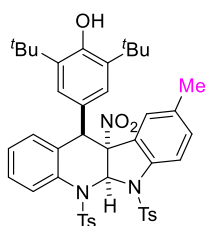

It was purified by flash chromatography (petroleum ether / EtOAc, 8:1) to afford white solid (32.9 mg, 83% yield); m.p. 181.3-182.1 °C;

**<sup>1</sup>H NMR (400 MHz, CDCl<sub>3</sub>)** δ 7.77 (d, *J* = 7.9 Hz, 2H), 7.67 – 7.58 (m, 3H), 7.55 (d, *J* = 8.5 Hz, 1H), 7.34 – 6.96 (m, 9H), 6.60 (s, 3H), 5.29 (s, 1H), 3.80 (s, 1H), 2.37 (s, 3H), 2.35 (s, 3H), 1.38 (s, 18H).

**<sup>13</sup>C NMR (101 MHz, CDCl<sub>3</sub>)** δ 154.3, 144.9, 144.1, 142.7, 142.4, 141.5, 136.0, 134.5, 133.2, 132.8, 132.1, 131.9, 130.8, 129.9, 129.2, 128.4, 128.4, 128.0, 127.7, 127.6, 127.3, 121.0, 120.3, 114.7, 104.7, 81.7, 51.7, 34.3, 30.2, 21.7, 21.6, 21.2.

**HRMS (ESI-TOF)** calcd. for C<sub>44</sub>H<sub>47</sub>N<sub>3</sub>O<sub>7</sub>S<sub>2</sub>Na [M + Na]<sup>+</sup> 816.2748; found: 816.2758.

**2,6-di-*tert*-butyl-4-(8-methyl-10b-nitro-5,6-ditosyl-5a,6,10b,11-tetrahydro-5H-indolo[2,3-b]quinolin-11-yl)phenol (3q)**

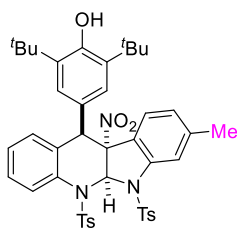

It was purified by flash chromatography (petroleum ether / EtOAc, 8:1) to afford white solid (30.2 mg, 76% yield); m.p. 176.6-177.3 °C; 92:8 er. The er was determined by HPLC, Chiralpak IA, *i*-PrOH/hexane = 20/80, flow rate 1.0 mL/min, λ = 254 nm, *t*<sub>major</sub> = 9.4 min, *t*<sub>minor</sub> = 12.0 min.

**<sup>1</sup>H NMR (400 MHz, CDCl<sub>3</sub>)** δ 7.79 (d, *J* = 8.3 Hz, 2H), 7.67 – 7.59 (m, 2H), 7.56 (dd, *J* = 7.9, 1.3 Hz, 1H), 7.49 – 7.44 (m, 1H), 7.35 – 7.15 (m, 4H), 7.17 – 7.13 (m, 2H), 7.13 – 7.01 (m, 2H), 6.88 – 6.25 (m, 4H), 5.28 (s, 1H), 3.79 (s, 1H), 2.38 (s, 3H), 2.35 (s, 3H), 2.31 (s, 3H), 1.36 (s, 18H).

**<sup>13</sup>C NMR (101 MHz, CDCl<sub>3</sub>)** δ 154.3, 144.9, 144.1, 143.9, 142.6, 136.0, 134.5, 133.6, 132.0, 131.3, 130.5, 129.9, 129.2, 128.7, 128.4, 128.3, 128.0, 127.7, 127.6, 127.4, 123.5, 120.3, 118.1, 115.2, 104.5, 81.7, 51.6, 34.3, 30.2, 21.9, 21.6.

HRMS (ESI-TOF) calcd. for  $C_{44}H_{47}N_3O_7S_2Na$   $[M + Na]^+$  816.2748; found: 816.2753.

**2,6-di-tert-butyl-4-(2-methyl-10b-nitro-5,6-ditosyl-5a,6,10b,11-tetrahydro-5H-indolo[2,3-b]quinolin-11-yl)phenol (3r)**

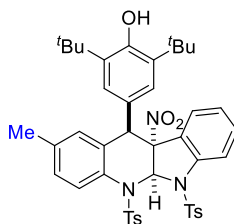

It was purified by flash chromatography (petroleum ether / EtOAc, 8:1) to afford white solid (32.1 mg, 81% yield); m.p. 193.8-194.7 °C;

**$^1H$  NMR (400 MHz, DMSO- $d_6$ )**  $\delta$  7.71 (d,  $J$  = 8.1 Hz, 2H), 7.48 – 7.34 (m, 6H), 7.34 – 7.27 (m, 4H), 7.23 (ddd,  $J$  = 8.6, 6.1, 2.9 Hz, 1H), 7.17 (s, 1H), 7.03 (d,  $J$  = 7.8 Hz, 1H), 6.88 – 6.47 (m, 3H), 3.51 (s, 1H), 2.36 (s, 3H), 2.29 (d,  $J$  = 11.3 Hz, 6H), 1.31 (s, 18H).

**$^{13}C$  NMR (101 MHz, DMSO- $d_6$ )**  $\delta$  155.0, 145.8, 145.1, 143.6, 143.3, 135.3, 134.2, 133.6, 131.8, 130.7, 131.3, 130.6, 130.0, 129.2, 128.3, 128.1, 127.6, 127.6, 127.5, 124.2, 121.3, 120.0, 117.8, 115.1, 104.4, 82.0, 51.6, 34.9, 30.5, 21.8, 21.5, 21.5.

HRMS (ESI-TOF) calcd. for  $C_{44}H_{47}N_3O_7S_2$   $[M + Na]^+$  816.2748; found: 816.2745.

**2,6-di-tert-butyl-4-(4-methyl-10b-nitro-5,6-ditosyl-5a,6,10b,11-tetrahydro-5H-indolo[2,3-b]quinolin-11-yl)phenol (3s)**

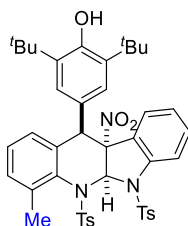

It was purified by flash chromatography (petroleum ether / EtOAc, 8:1) to afford white solid (22.2 mg, 56% yield); m.p. 197.0-197.7 °C;

**$^1H$  NMR (400 MHz, DMSO- $d_6$ )**  $\delta$  7.67 (d,  $J$  = 8.0 Hz, 2H), 7.51 – 7.36 (m, 6H), 7.29 (dt,  $J$  = 29.7, 7.4 Hz, 5H), 7.16 (s, 1H), 7.06 (d,  $J$  = 8.0 Hz, 1H), 6.62 (s, 3H), 3.54 (s, 1H), 2.36 (s, 3H), 2.31 (s, 3H), 2.16 (s, 3H), 1.32 (s, 18H).

**$^{13}C$  NMR (101 MHz,  $CDCl_3$ )**  $\delta$  155.1, 147.3, 145.9, 144.6, 143.1, 135.3, 135.3, 134.7, 134.4, 133.3, 132.6, 131.8, 130.6, 130.6, 130.0, 130.0, 129.5, 128.6, 127.5, 127.5, 120.1, 120.1, 119.3, 114.7, 104.6, 82.0, 51.8, 36.0, 30.5, 27.1, 21.4, 21.1.

HRMS (ESI-TOF) calcd. for  $C_{44}H_{47}N_3O_7S_2$   $[M + Na]^+$  816.2748; found: 816.2766.

### 3. Scale-up reaction for the synthesis of 3

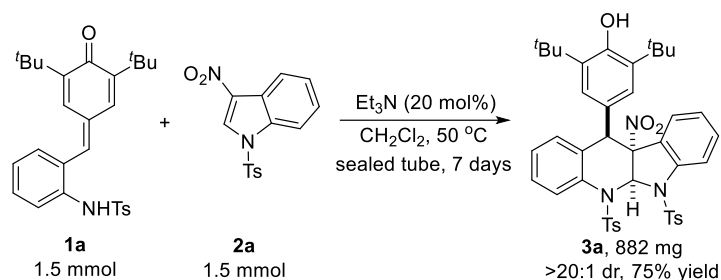

Compound **1a** (695 mg, 1.5 mmol) and Compound **2a** (473 mg, 1.5 mmol) was dissolved in DCM (15 mL) and triethylamine (42  $\mu\text{L}$ , 0.3 mmol) was added in sealed tube. The mixture was stirred at 50 °C for 7 days. The solution concentrated under rotatory evaporation and the crude was purified by column chromatography (petroleum ether / EtOAc = 8/1), affording compound **3a** as a white solid (882 mg, 75% yield).

#### 4. Synthesis of compound 4

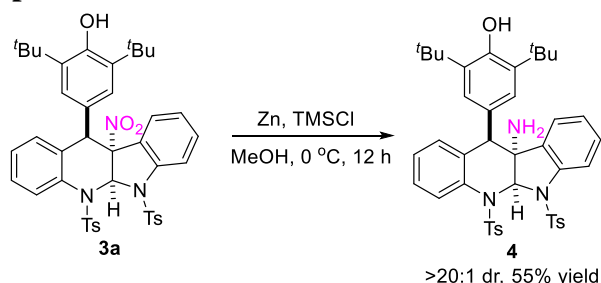

Zinc powder (65 mg, 1 mmol, 20 equiv) was added to a solution of **3a** (39.0 mg, 0.05 mmol, 1 equiv) and trimethylsilyl chloride (0.13 mL, 1 mmol, 20 equiv) in methanol at 0 °C. The mixture stirred at 0 °C for 12 h. The suspension was filtered and washed by saturated  $\text{NaHCO}_3$ . The filtrate extracted with DCM. The combined organic fractions were dried by  $\text{MgSO}_4$ , filtered and concentrated by rotatory evaporation. Then the residue was purified by column chromatography (petroleum ether / EtOAc = 5/1), affording compound **4** as a white solid (20.6 mg, 55% yield).

#### 4-(10b-amino-5,6-ditosyl-5a,6,10b,11-tetrahydro-5H-indolo[2,3-b]quinolin-11-yl)-2,6-di-*tert*-butylphenol (**4**)

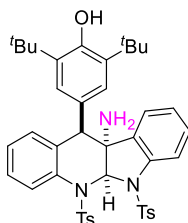

It was purified by flash chromatography (petroleum ether / EtOAc, 5:1) to afford white solid (20.6 mg, 55% yield); >20:1 dr; m.p. 164.2-165.0 °C;

$^1\text{H NMR}$  (400 MHz,  $\text{CDCl}_3$ )  $\delta$  7.95 – 7.81 (m, 2H), 7.70 (d,  $J = 8.2$  Hz, 2H), 7.57 (d,  $J = 8.2$  Hz, 1H), 7.40 (dd,  $J = 8.0, 1.3$  Hz, 1H), 7.24 (d,  $J = 8.1$  Hz, 2H), 7.21 – 7.10 (m, 4H), 7.07 – 6.92 (m, 2H), 6.84 (s, 1H), 6.72 (t,  $J = 7.5$  Hz, 1H), 6.62 (s, 2H), 6.16 (dd,  $J = 7.7, 1.3$  Hz, 1H), 5.25 (s, 1H), 4.32 (s, 2H), 3.50 (s, 1H), 2.37 (d,  $J = 6.0$  Hz, 6H), 1.37 (s, 18H).

$^{13}\text{C}$  NMR (101 MHz,  $\text{CDCl}_3$ )  $\delta$  153.7, 144.2, 143.8, 143.5, 136.8, 134.8, 134.6, 134.3, 129.8, 129.5, 129.2, 129.1, 128.2, 128.0, 128.0, 127.3, 127.1, 127.0, 126.1, 122.5, 121.9, 114.3, 80.5, 79.6, 47.9, 34.3, 30.25, 21.7, 21.6.

HRMS (ESI-TOF) calcd. for  $\text{C}_{43}\text{H}_{47}\text{N}_3\text{O}_5\text{S}_2$   $[\text{M} + \text{K}]^+$  788.2589; found: 788.2877.

## 5. Optimization of conditions for catalytic asymmetric version

**Table S1** Optimization of reaction conditions with catalysts

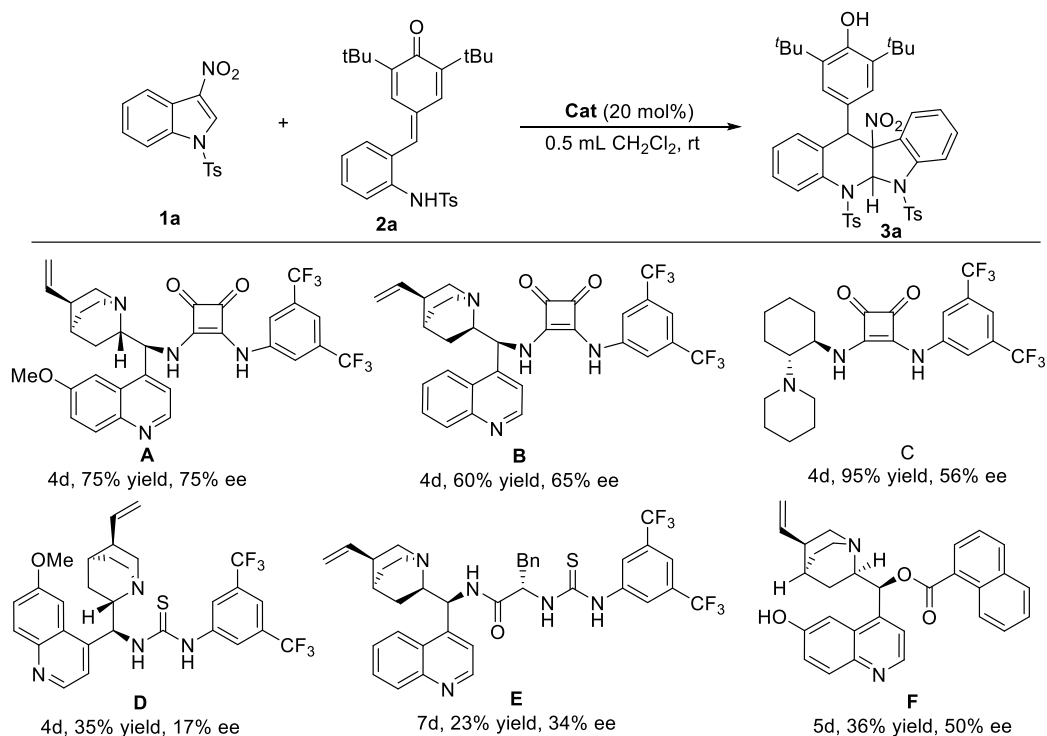

The reaction was carried out with **1a** (0.05 mmol), **2a** (0.05 mmol) and **cat** (20 mol%) in 0.5 mL of DCM at room temperature. The yield refers to the isolated yield.

**Table S2** Optimization of reaction conditions with other parameters

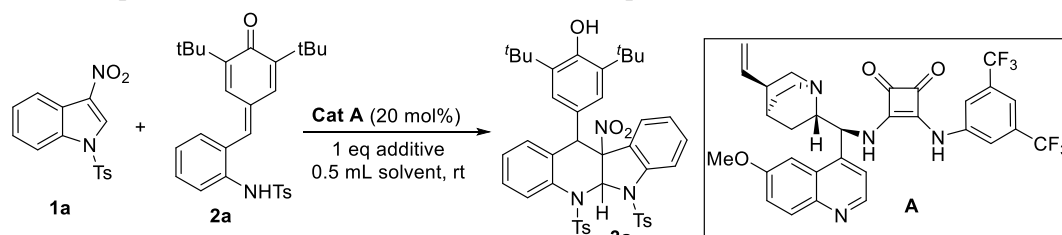

| entry | solvent                | additive           | time (days) | yield (%) <sup>b</sup> | ee (%) <sup>c</sup> |
|-------|------------------------|--------------------|-------------|------------------------|---------------------|
| 1     | DCM                    | -                  | 4           | 75                     | 75                  |
| 2     | toluene                | -                  | 8           | 40                     | 65                  |
| 3     | MTBE                   | -                  | 8           | 34                     | 71                  |
| 4     | THF                    | -                  | 8           | trace                  | -                   |
| 5     | $\text{CHCl}_3$        | -                  | 4           | 97                     | 72                  |
| 6     | $\text{CH}_3\text{CN}$ | -                  | 3           | 84                     | 33                  |
| 7     | EA                     | -                  | 3           | 62                     | 59                  |
| 8     | DMF                    | -                  | 2           | 80                     | 1                   |
| 9     | DCM                    | (D)-ethyl tartrate | 7           | 72                     | 57                  |



|                 |                   |                    |          |           |           |
|-----------------|-------------------|--------------------|----------|-----------|-----------|
| 10              | DCM               | (L)-ethyl tartrate | 7        | 67        | 56        |
| <b>11</b>       | <b>DCM</b>        | <b>(R)-BINOL</b>   | <b>7</b> | <b>78</b> | <b>82</b> |
| 12              | DCM               | (S)-BINOL          | 7        | 75        | 74        |
| 13 <sup>d</sup> | DCM               | -                  | 7        | 96        | 73        |
| 14 <sup>d</sup> | CHCl <sub>3</sub> | -                  | 7        | 98        | 72        |
| 15 <sup>f</sup> | DCM               | -                  | 7        | 70        | 80        |

<sup>a</sup>Unless otherwise noted, the reaction was carried out with **1a** (0.05 mmol), **2a** (0.05 mmol) and **cat** (20 mol%) in 0.5 mL of solvent at room temperature. <sup>b</sup>Isolated yield. <sup>c</sup>Determined by chiral HPLC. <sup>d</sup>Run at 0 °C. <sup>e</sup>Run at -10 °C.

## 6. X-ray crystal structure of compound **3a**

Single crystals of compound **3a** were prepared from the mixture solvent of dichloromethane and EtOH. A suitable crystal was selected for structure determination on a Xcalibur, Eos, Gemini diffractometer. The crystal was kept at 293(2) K during data collection. Using Olex2<sup>[1]</sup>, the structure was solved with the ShelXS<sup>[2]</sup> structure solution program using Direct Methods and refined with the ShelXL<sup>[3]</sup> refinement package using Least Squares minimisation.

[1] Dolomanov, O. V.; Bourhis, L. J.; Gildea, R. J, Howard, J. A. K.; Puschmann, H. *J. Appl. Cryst.* **2009**, *42*, 339-341.

[2] Sheldrick, G. M. *Acta Cryst.* **2008**, A64, 112-122.

[3] Sheldrick, G. M. *Acta Cryst.* **2015**, C71, 3-8.

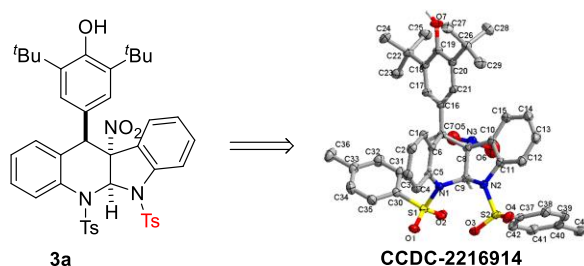

ORTEP of **3a** (at 50% level)

Table 1 Crystal data and structure refinement for **3a**

|                     |                                                                              |
|---------------------|------------------------------------------------------------------------------|
| Identification code | <b>3a</b>                                                                    |
| Empirical formula   | C <sub>43</sub> H <sub>45</sub> N <sub>3</sub> O <sub>7</sub> S <sub>2</sub> |
| Formula weight      | 779.94                                                                       |
| Temperature/K       | 293(2)                                                                       |
| Crystal system      | monoclinic                                                                   |
| Space group         | P2 <sub>1</sub> /c                                                           |
| a/Å                 | 14.5995(2)                                                                   |
| b/Å                 | 10.0324(2)                                                                   |
| c/Å                 | 27.7318(5)                                                                   |
| α/°                 | 90                                                                           |
| β/°                 | 104.9954(18)                                                                 |
| γ/°                 | 90                                                                           |

|                                             |                                                               |
|---------------------------------------------|---------------------------------------------------------------|
| Volume/Å <sup>3</sup>                       | 3923.48(13)                                                   |
| Z                                           | 4                                                             |
| ρ <sub>calc</sub> /cm <sup>3</sup>          | 1.320                                                         |
| μ/mm <sup>-1</sup>                          | 1.680                                                         |
| F(000)                                      | 1648.0                                                        |
| Crystal size/mm <sup>3</sup>                | 0.17 × 0.12 × 0.1                                             |
| Radiation                                   | CuKα (λ = 1.54184)                                            |
| 2Θ range for data collection/°              | 6.6 to 142.102                                                |
| Index ranges                                | -17 ≤ h ≤ 12, -11 ≤ k ≤ 11, -34 ≤ l ≤ 33                      |
| Reflections collected                       | 17801                                                         |
| Independent reflections                     | 7407 [R <sub>int</sub> = 0.0350, R <sub>sigma</sub> = 0.0407] |
| Data/restraints/parameters                  | 7407/7/511                                                    |
| Goodness-of-fit on F <sup>2</sup>           | 1.035                                                         |
| Final R indexes [I ≥ 2σ (I)]                | R <sub>1</sub> = 0.0552, wR <sub>2</sub> = 0.1513             |
| Final R indexes [all data]                  | R <sub>1</sub> = 0.0696, wR <sub>2</sub> = 0.1659             |
| Largest diff. peak/hole / e Å <sup>-3</sup> | 0.70/-0.49                                                    |

## 7. Determination of the absolute configuration of 3a by ECD spectrum

Based on the experimental crystal structure of enantiomers, there are only two possible configurations (*C7R,C8R,C9R*)-**3a** and (*C7S,C8S,C9S*)-**3a**. To further determine the precise configuration of our chiral product, theoretical calculation of the ECD spectrum has been performed and compared with the experimental spectrum. For the ECD spectrum calculations, all structures were optimized at B3LYP<sup>1</sup> level of theory with 6-311+g(d,p)<sup>2</sup> basis set for all atoms. Empirical dispersion correction has been considered by using Grimme's DFT empirical dispersion correction with the Becke-Jonson (D3BJ) damping function.<sup>3</sup> Optimized minima were verified at the same level of theory by harmonic vibrational analysis to have no imaginary frequency. CD spectra were calculated by TDDFT at the CAM-B3LYP<sup>4</sup>/Def2SVP<sup>5</sup> level. All DFT geometry optimizations and TDDFT calculations were performed with Gaussian 16 program.<sup>6</sup>

- [1] (a) Becke, A. D. *Phys. Rev.* 1988, A38, 3098. (b) Becke, A. D. *J. Chem. Phys.* 1993, 98, 5648. (c) Lee, C.; Yang, W.; Parr, R. G. *Phys. Rev.* 1988, B37, 785.
- [2] (a) Krishnan, R.; Binkley, J. S.; Seeger, R.; Pople, J. A. *J. Chem. Phys.* 1980, 72, 650–654. (b) McLean, A. D.; Chandler, G. S. *J. Chem. Phys.* 1980, 72, 5639–5648.
- [3] Grimme, S.; Ehrlich, S.; Georigk, L. *J. Comput. Chem.* **2011**, 32, 1456-1465.
- [4] Yanai, T. V.; Tew, D. P.; Handy, N. C. *Chem. Phys. Lett.* **2004**, 393, 51-57.
- [5] Weigend, F.; Ahlrichs, R. *Phys. Chem. Chem. Phys.* **2005**, 7, 3297-3305.
- [6] Frisch, M. J.; Trucks, G. W.; Schlegel, H. B.; Scuseria, G. E. *et al.* Gaussian, Inc., Wallingford CT, 2019.

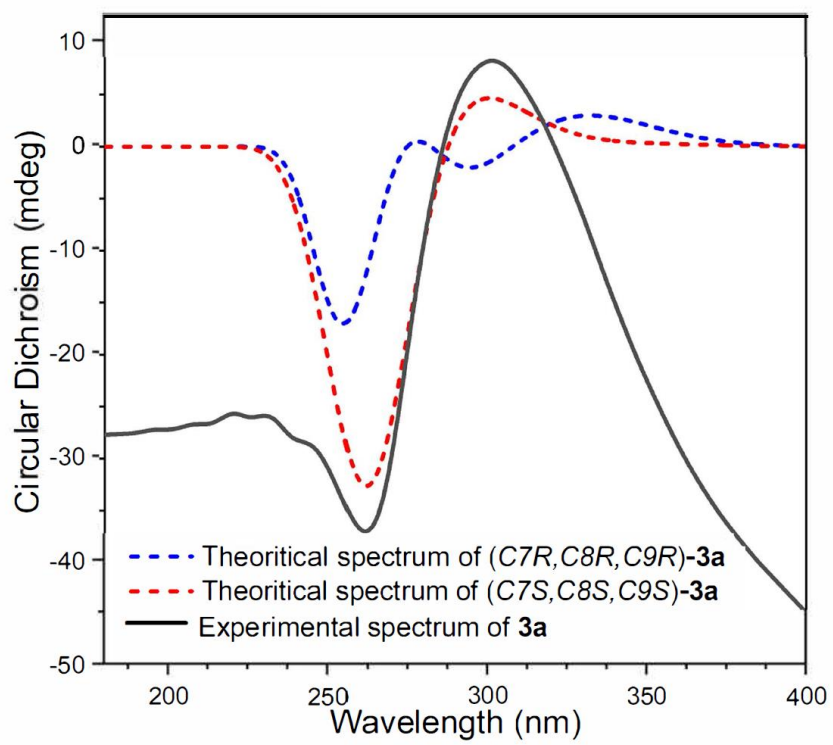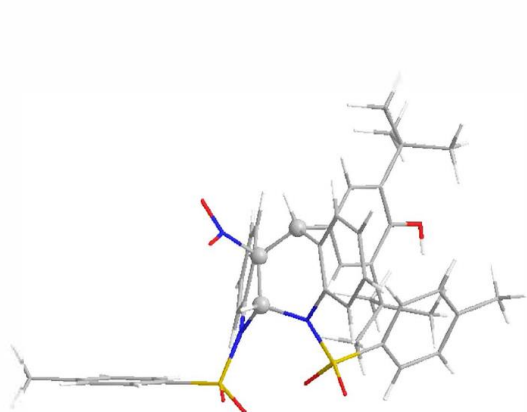

(C7R, C8R, C9R)-3a

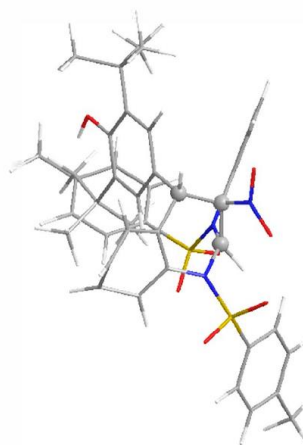

(C7S, C8S, C9S)-3a

## 8. $^1\text{H}$ NMR and $^{13}\text{C}$ NMR spectra for compounds 3 and 4

$^1\text{H}$  NMR spectrum of 3a

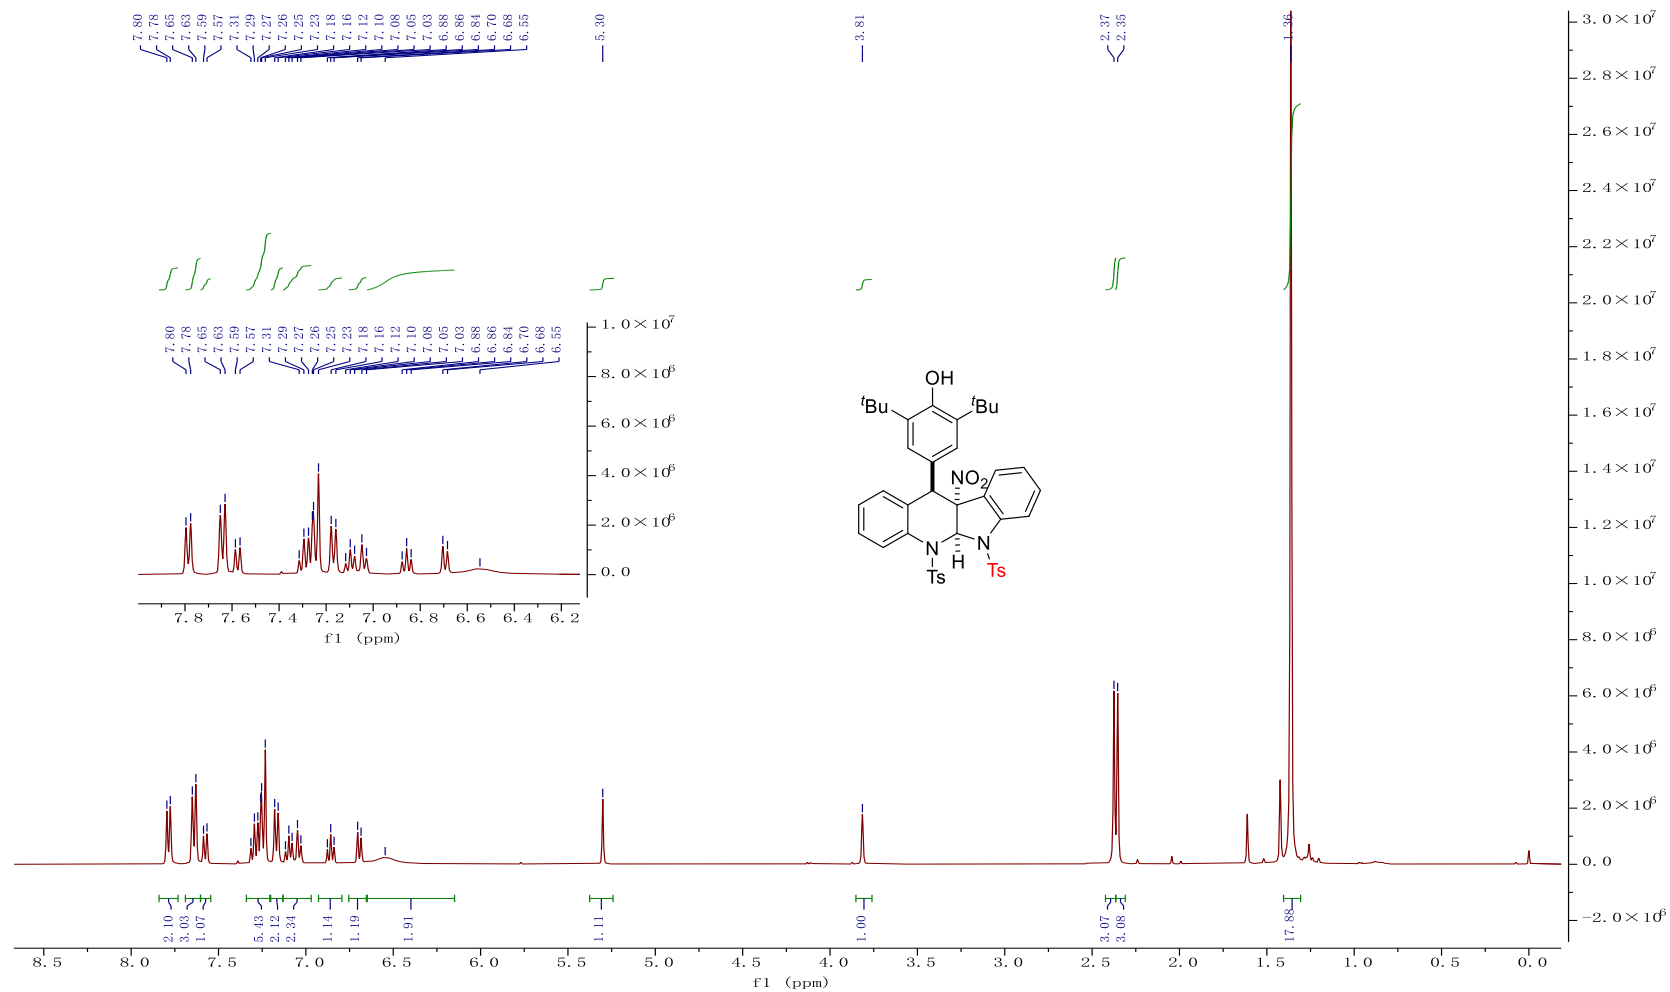

<sup>13</sup>C NMR spectrum of 3a

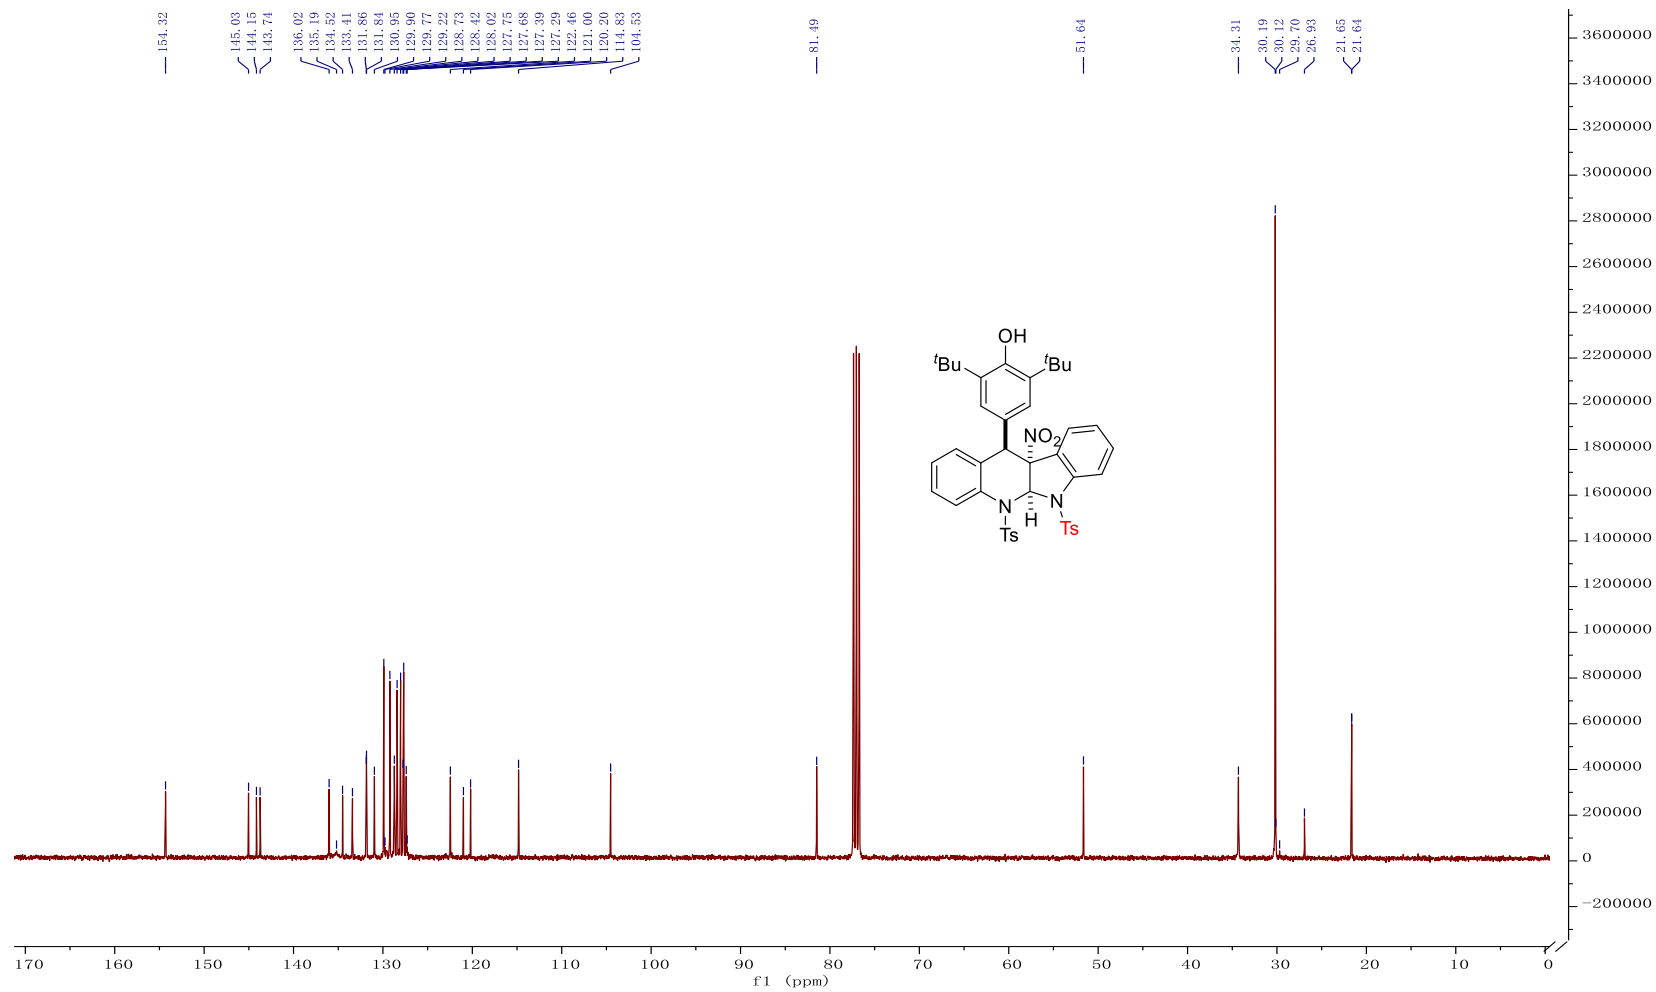

### HPLC spectra of 3a

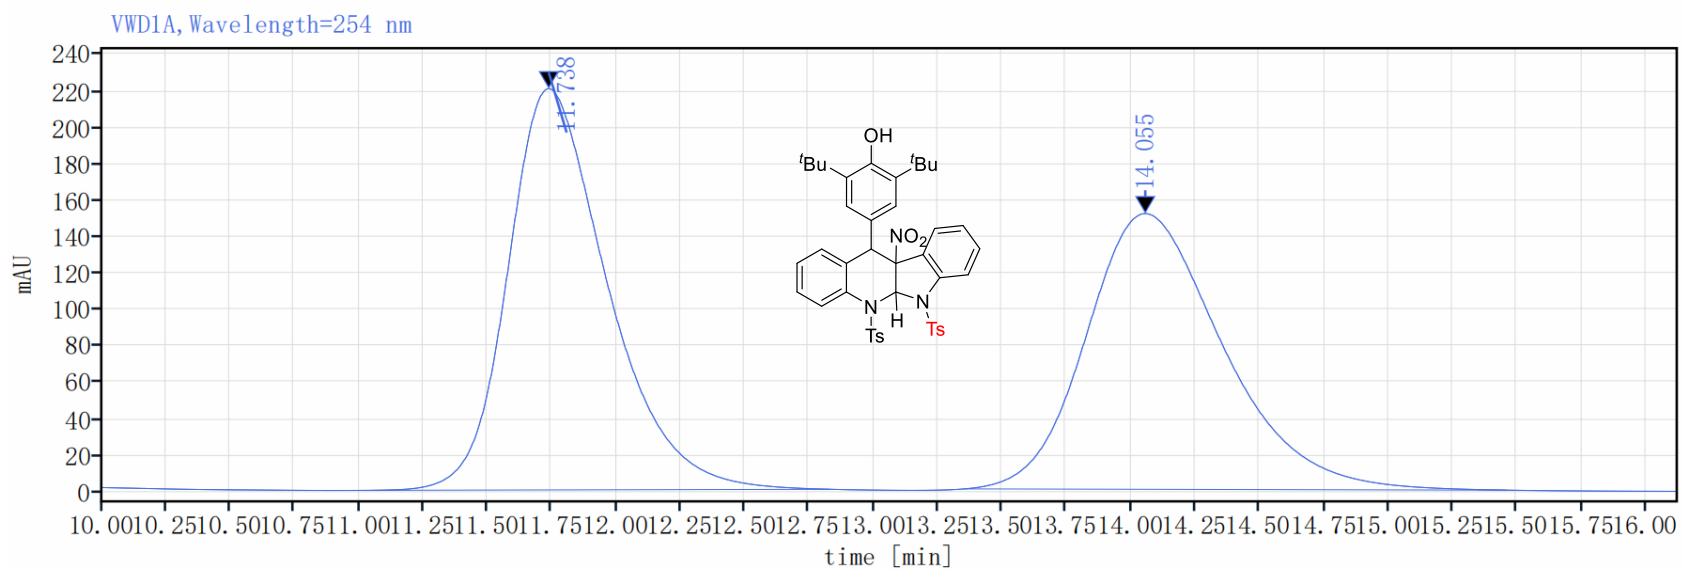

Detector VWD1A, Wavelength=254 nm

| Peak | Ret. Time [min] | Area     | Height | Area%  |
|------|-----------------|----------|--------|--------|
|      | 11.738          | 5928.79  | 220.19 | 51.45  |
|      | 14.055          | 5595.53  | 151.29 | 48.55  |
|      |                 | 11524.32 |        | 100.00 |

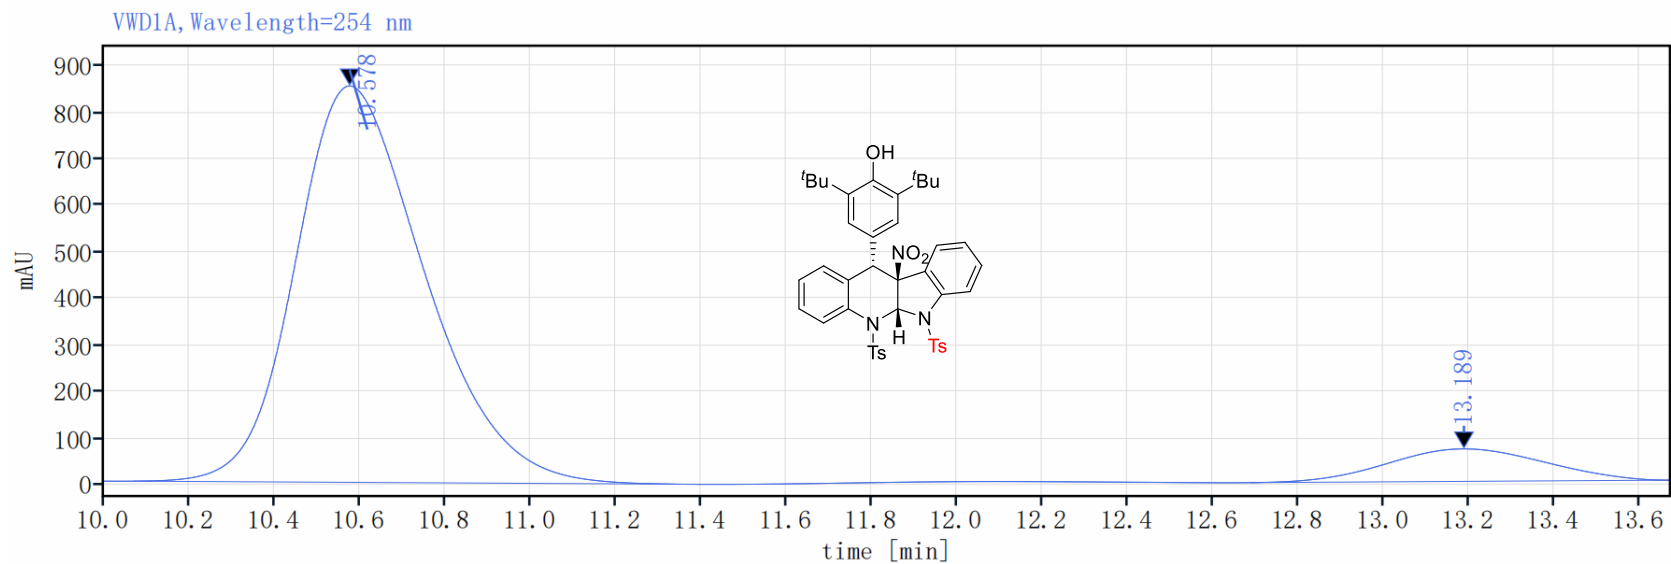

Detector VWD1A, Wavelength=254 nm

| Peak | Ret.Time [min] | Area     | Height | Area%  |
|------|----------------|----------|--------|--------|
|      | 10.578         | 17907.24 | 851.46 | 90.98  |
|      | 13.189         | 1774.45  | 69.77  | 9.02   |
|      |                | 19681.68 |        | 100.00 |

# <sup>1</sup>H NMR spectrum of 3b

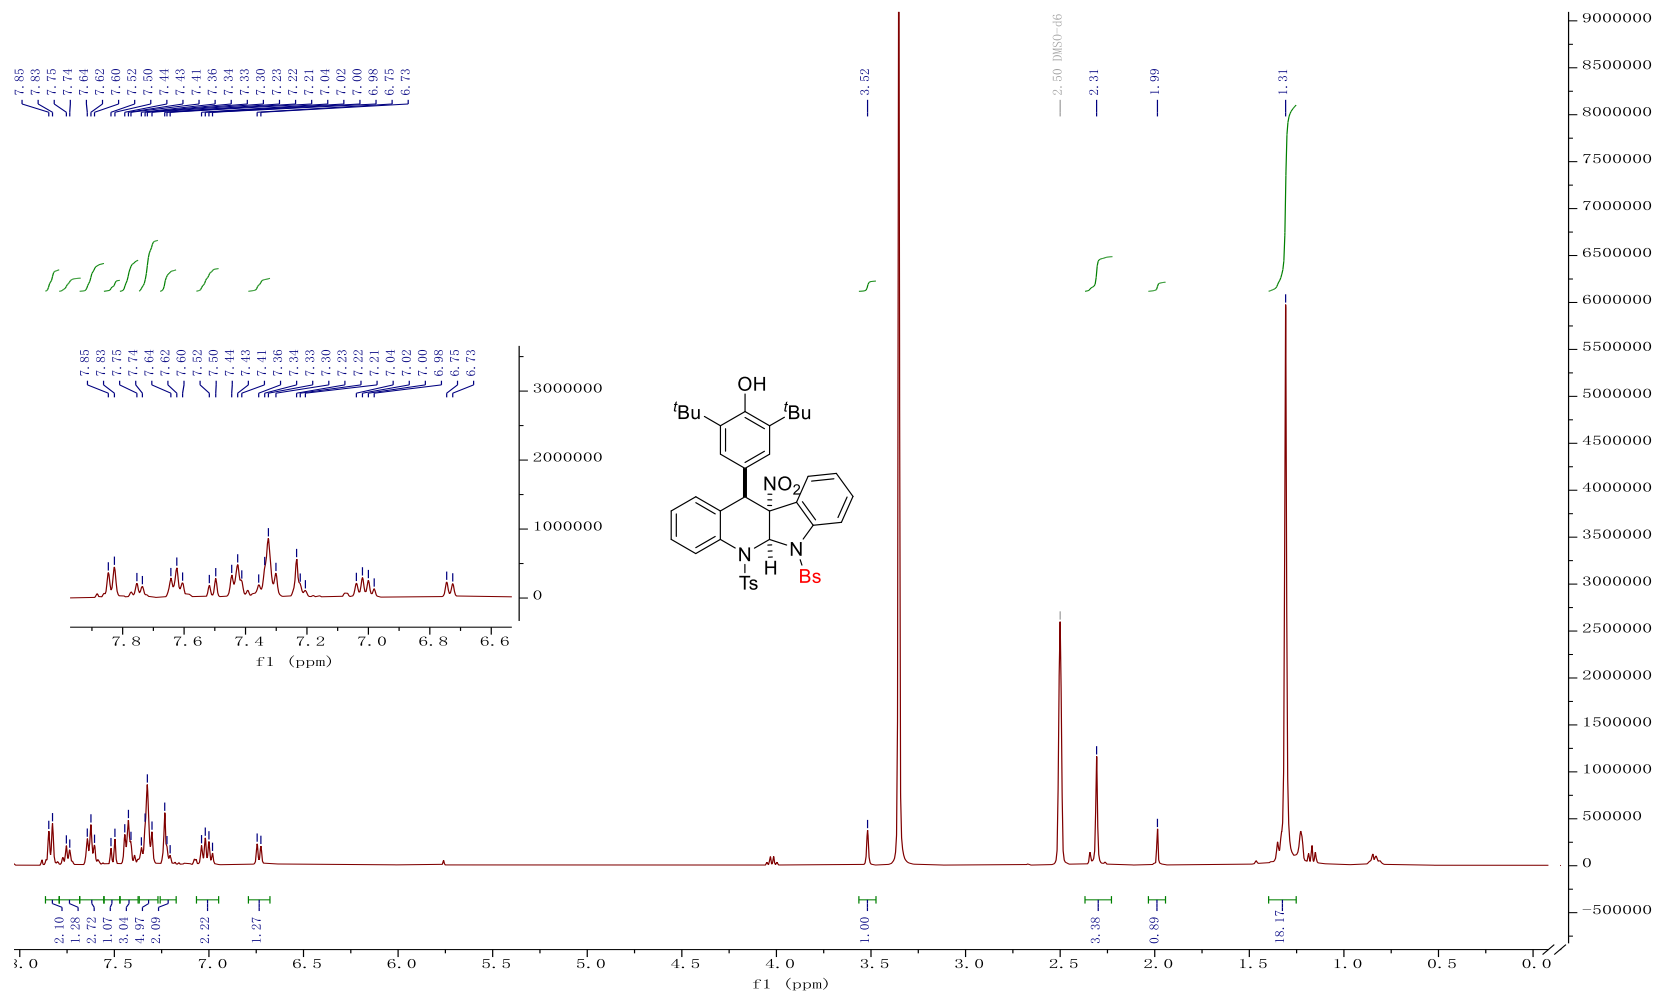



<sup>13</sup>C NMR spectrum of 3b

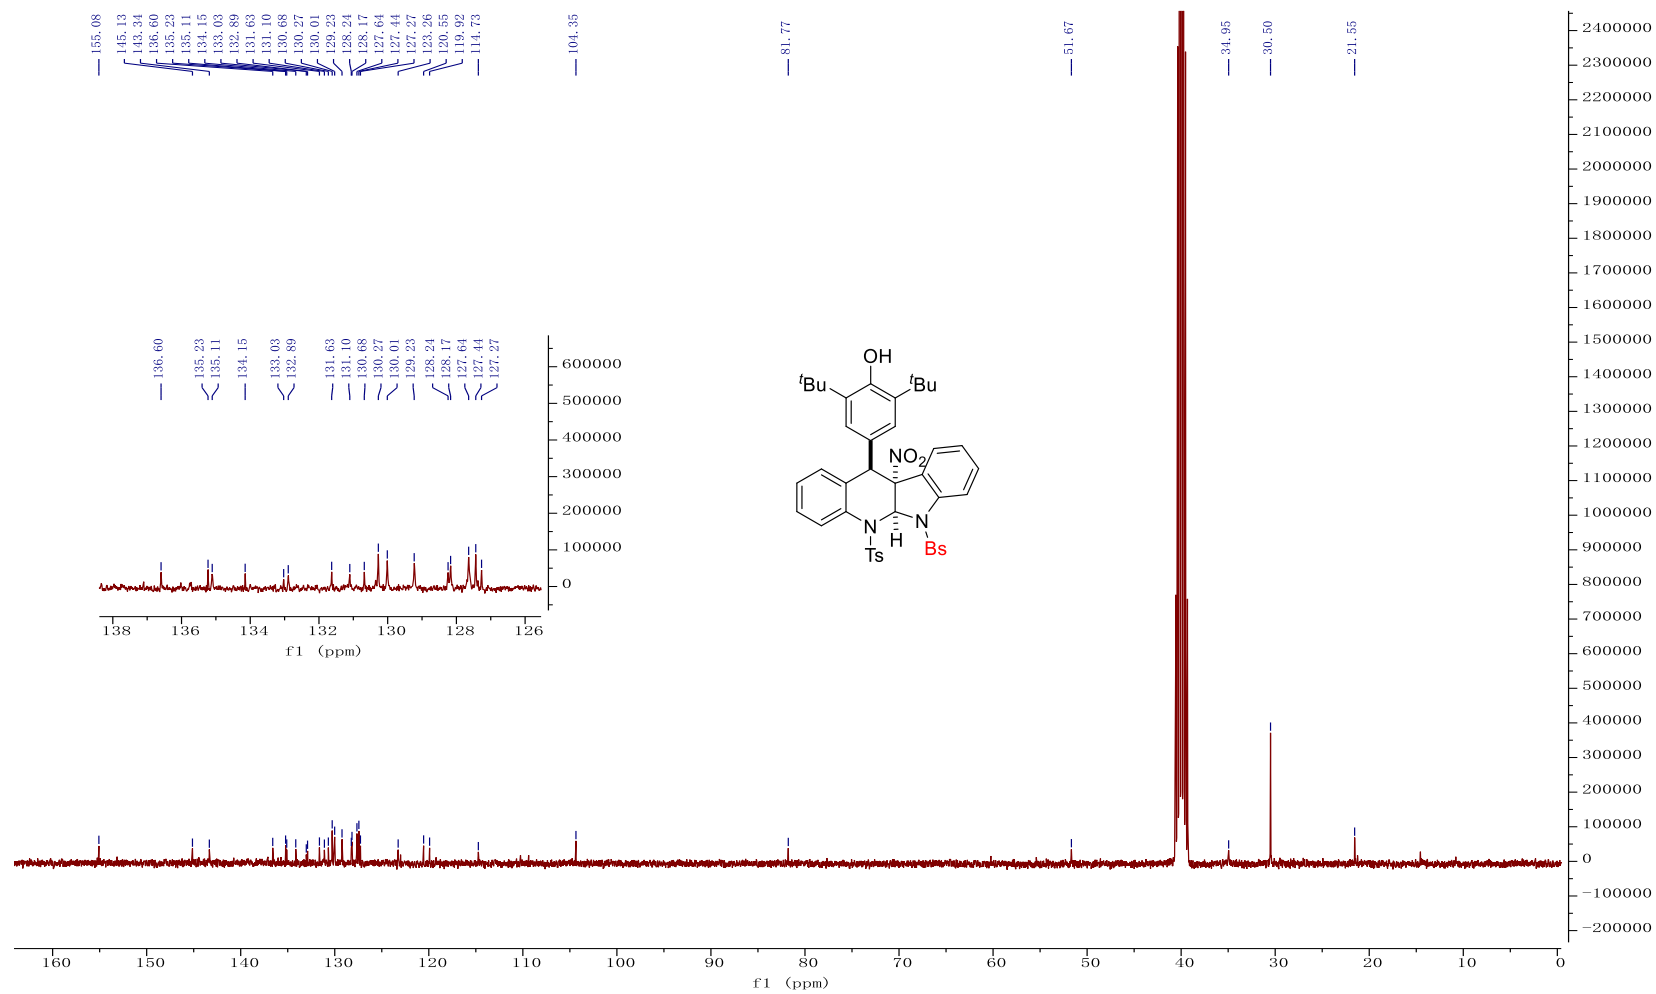

<sup>1</sup>H NMR spectrum of 3c

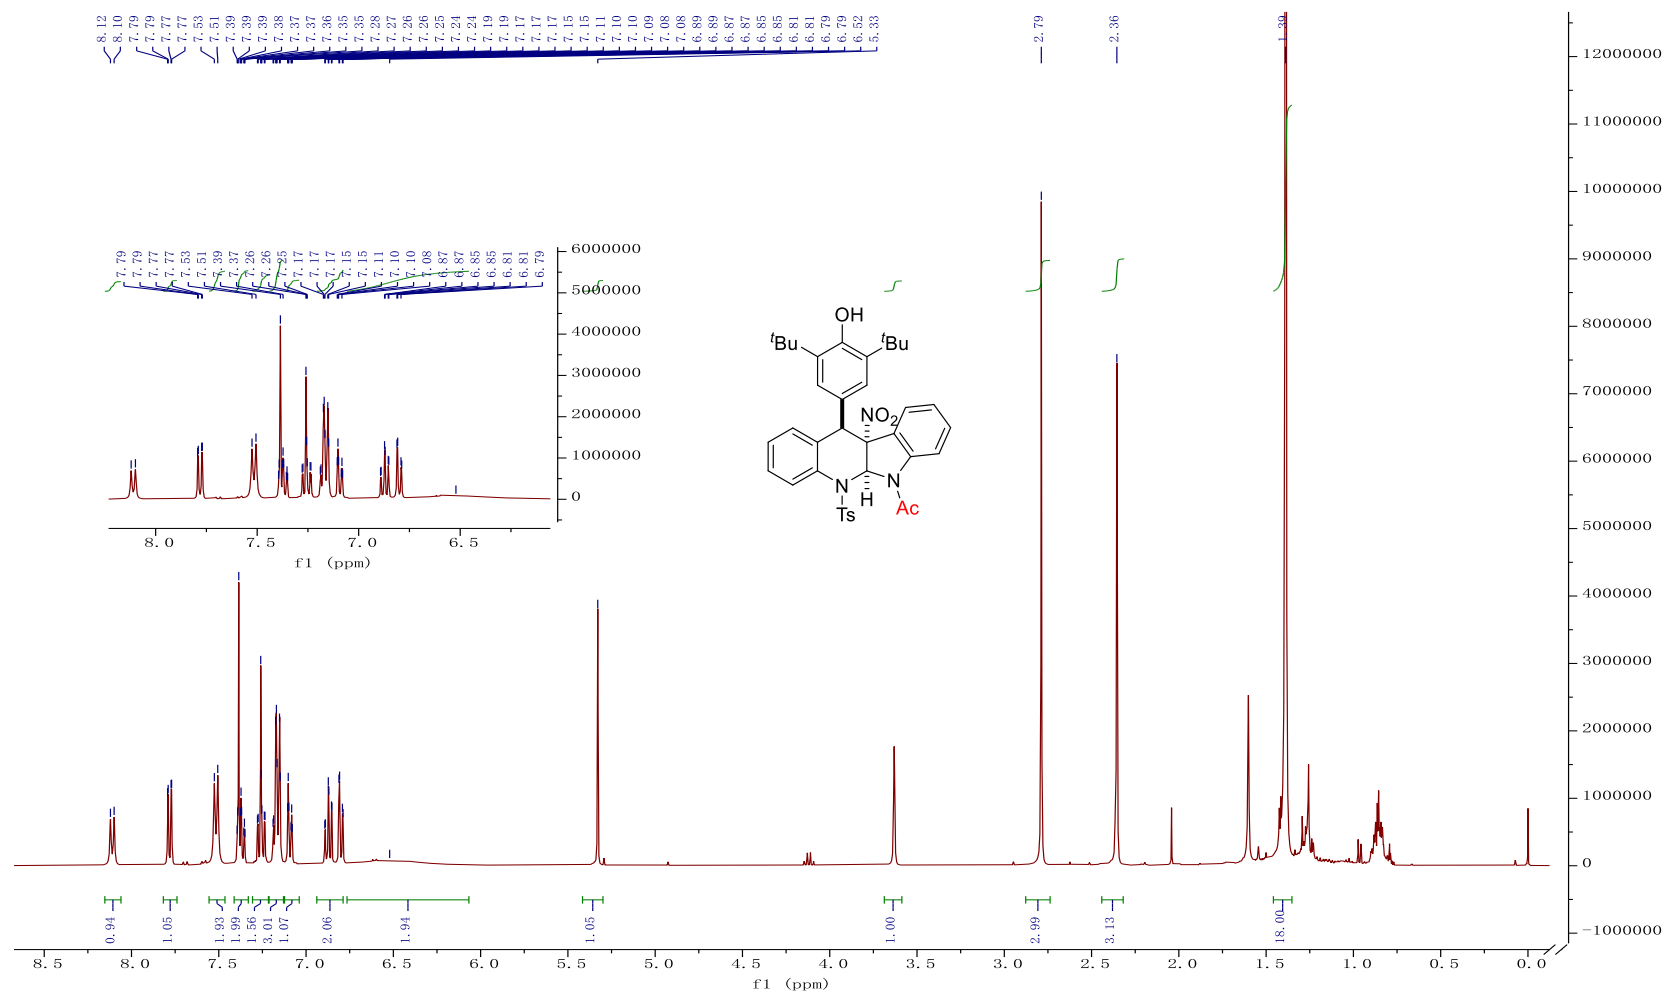

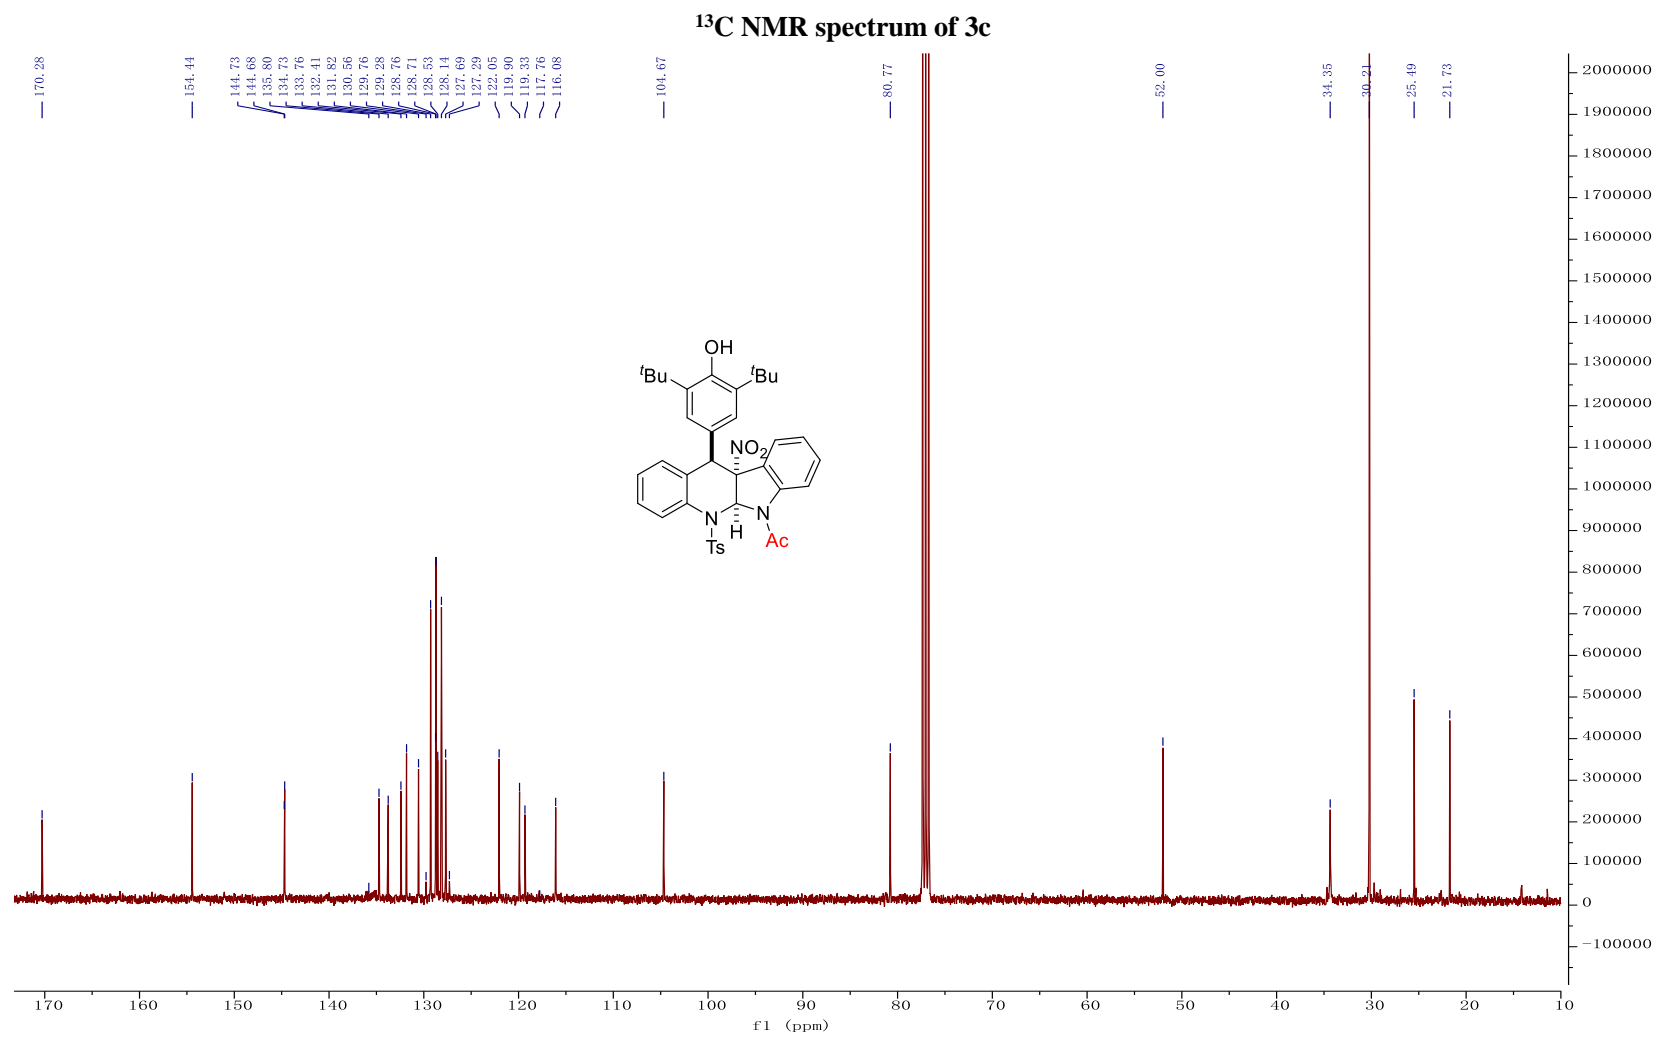

### HPLC spectra of 3c

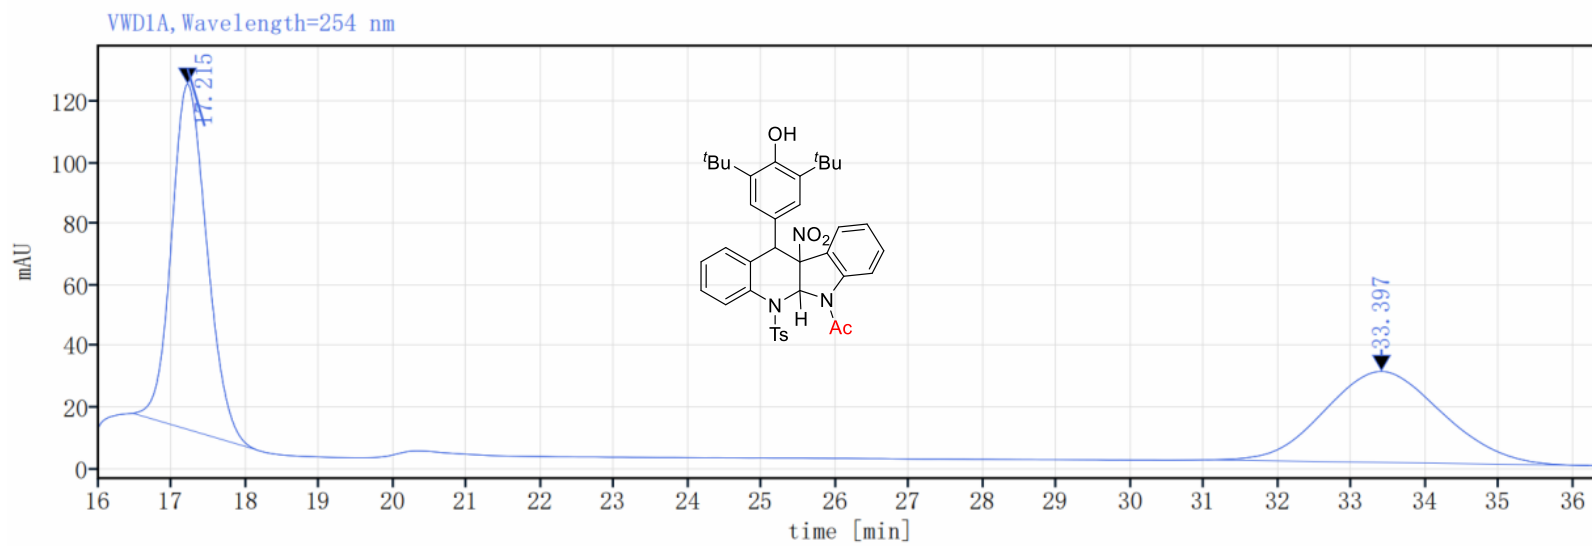

Detector VWD1A, Wavelength=254 nm

| Peak | Ret. Time [min] | Area    | Height | Area%  |
|------|-----------------|---------|--------|--------|
|      | 17.215          | 3770.37 | 112.66 | 53.45  |
|      | 33.397          | 3283.96 | 29.66  | 46.55  |
|      |                 | 7054.33 |        | 100.00 |

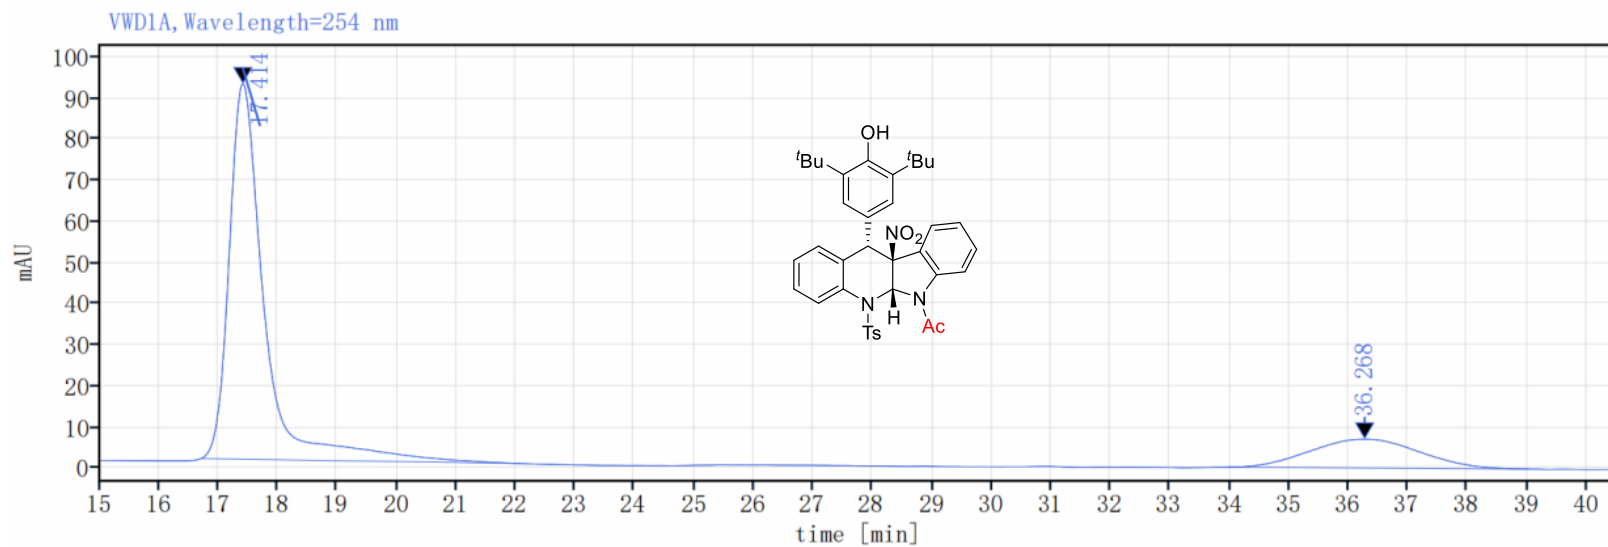

Detector VWD1A, Wavelength=254 nm

| Peak | Ret.Time [min] | Area    | Height | Area%  |
|------|----------------|---------|--------|--------|
|      | 17.414         | 3754.16 | 91.18  | 80.76  |
|      | 36.268         | 894.17  | 7.00   | 19.24  |
|      |                | 4648.34 |        | 100.00 |

# <sup>1</sup>H NMR spectrum of 3d

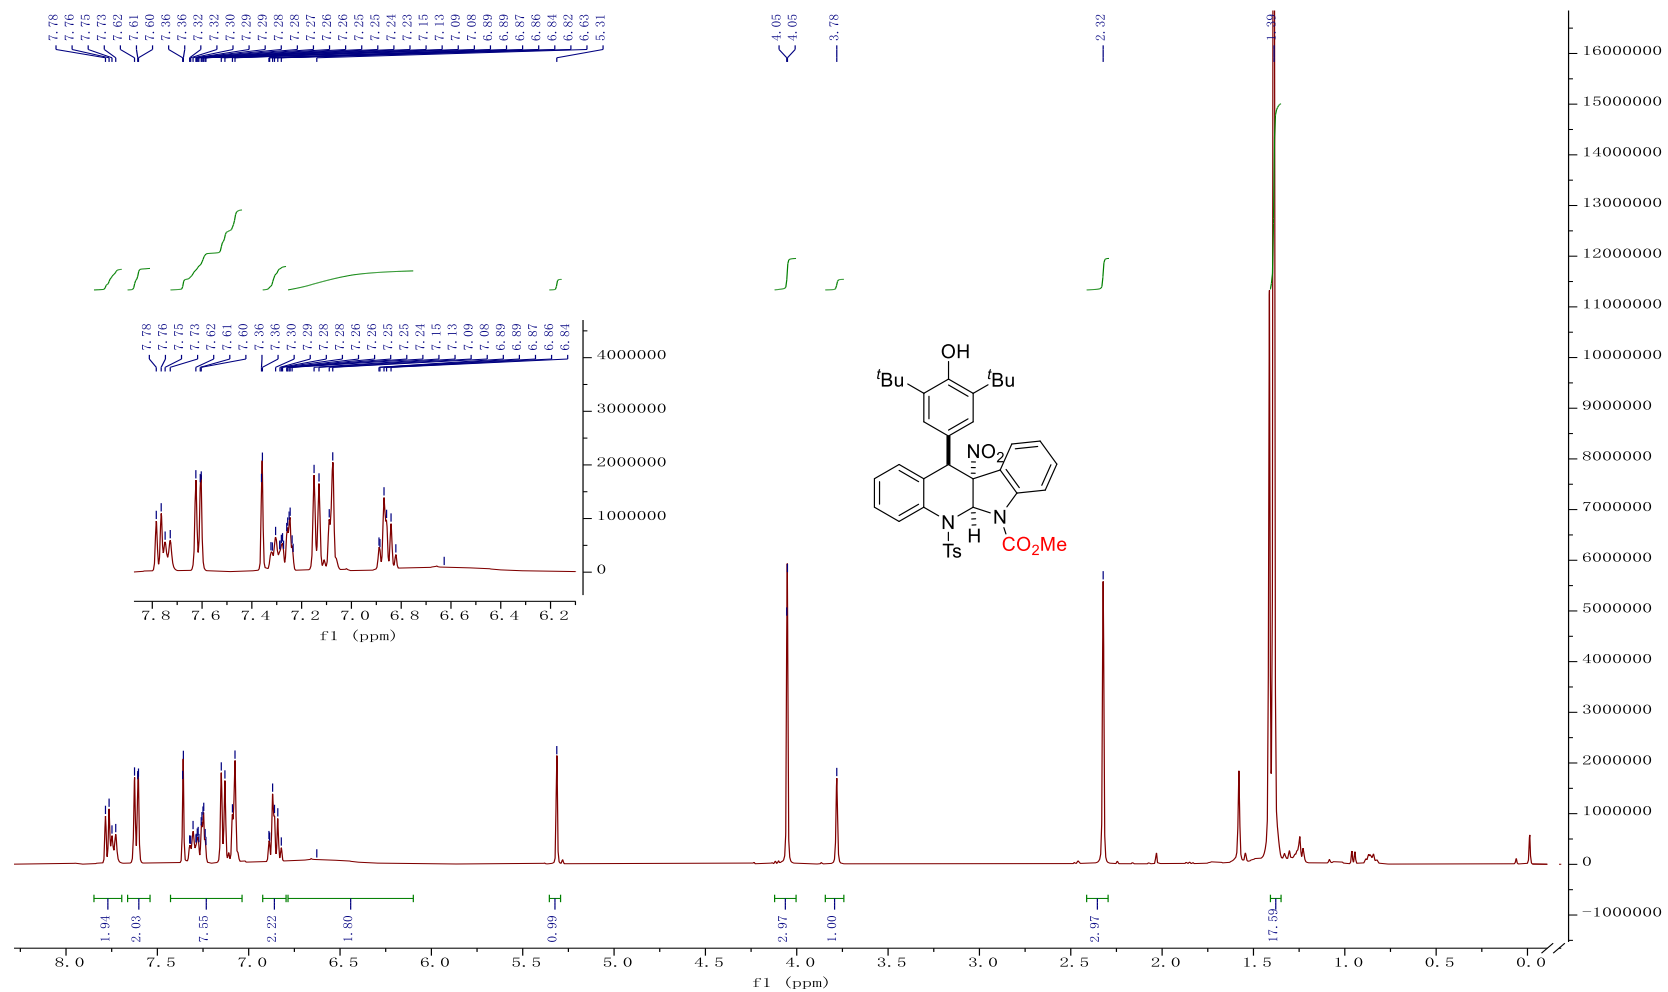

### <sup>13</sup>C NMR spectrum of 3d

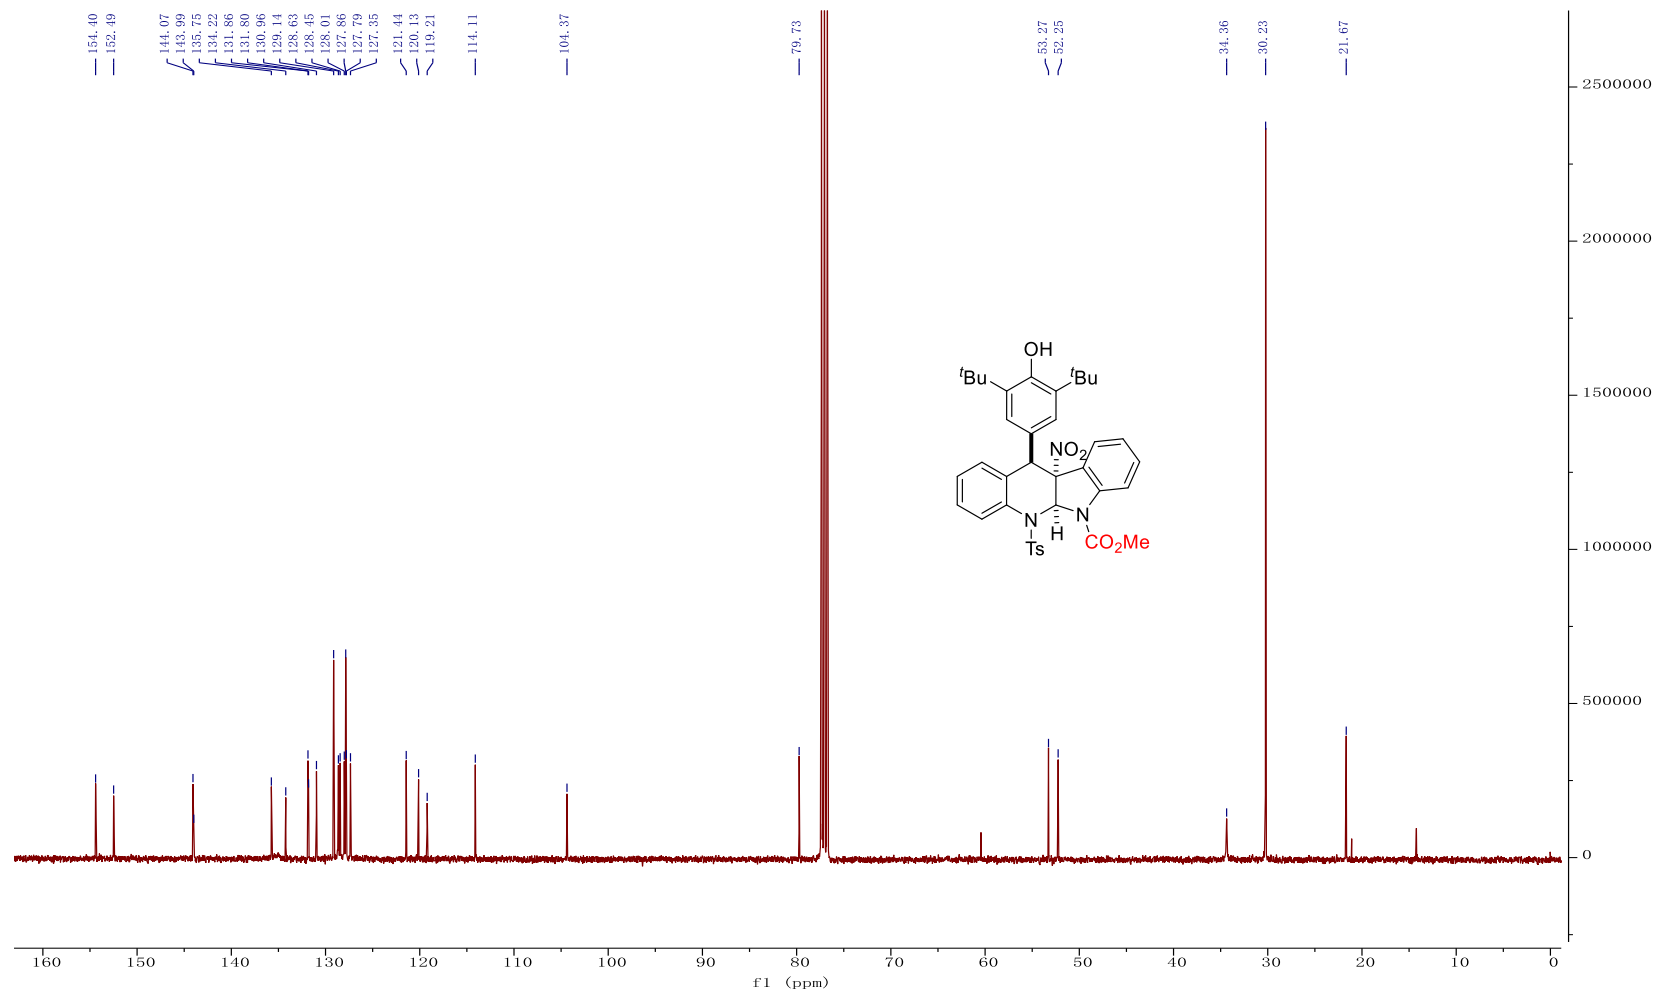

# <sup>1</sup>H NMR spectrum of 3e

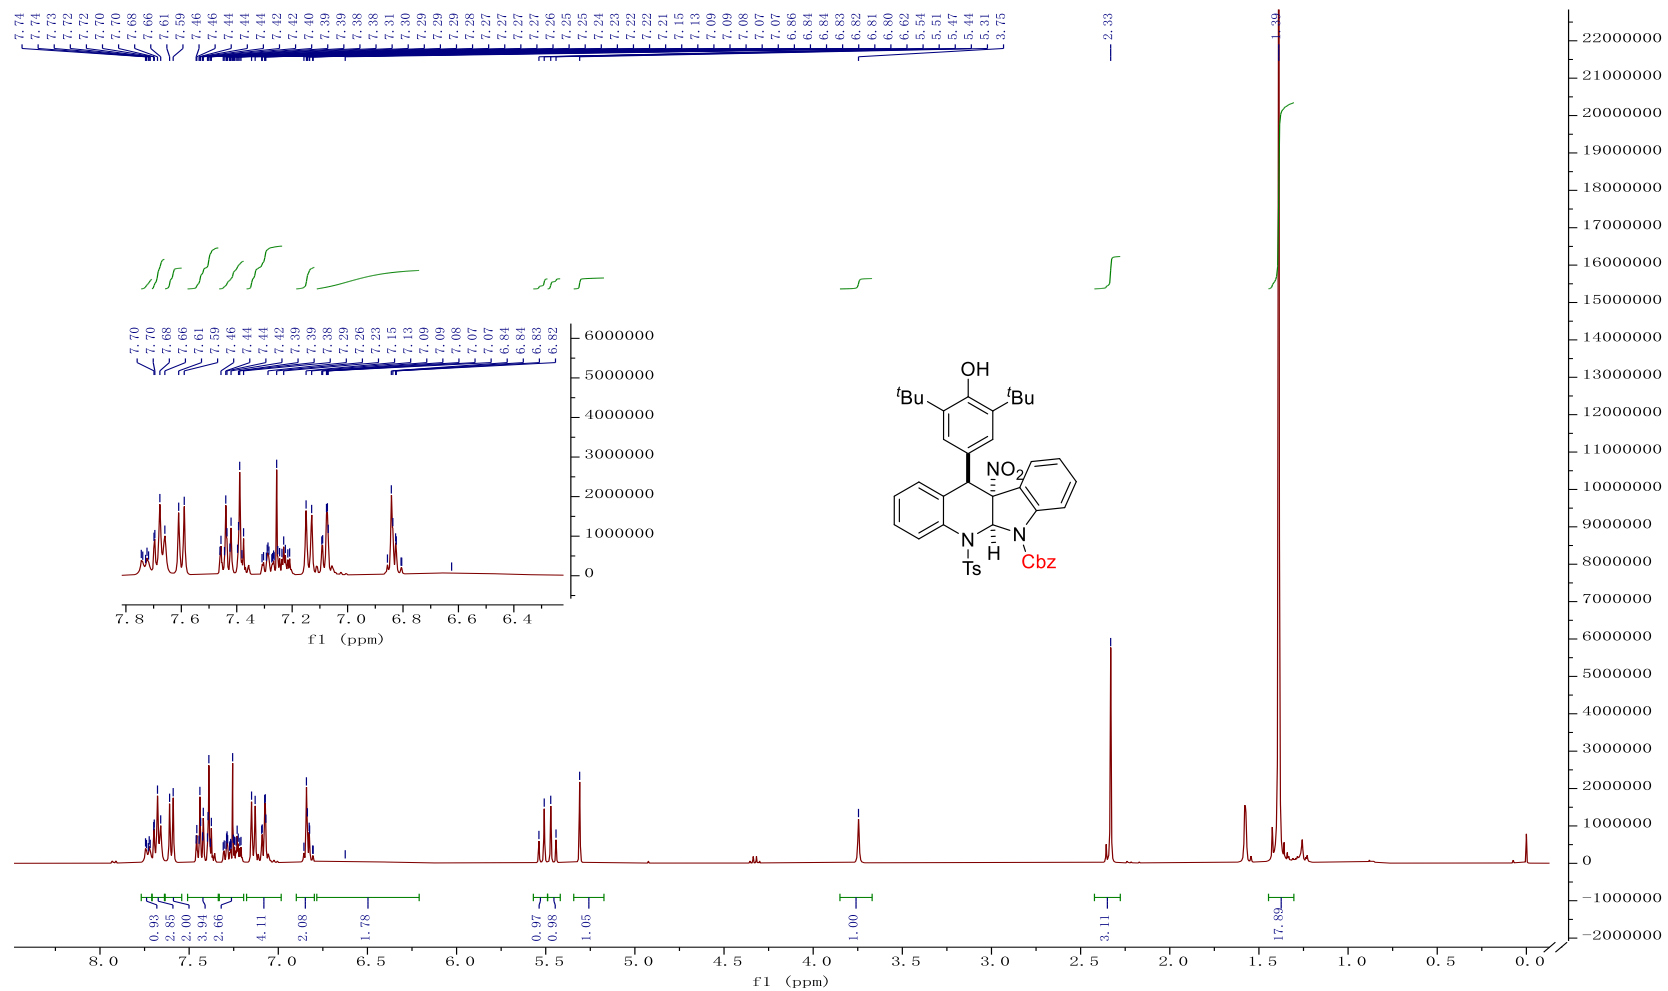



### <sup>13</sup>C NMR spectrum of 3e

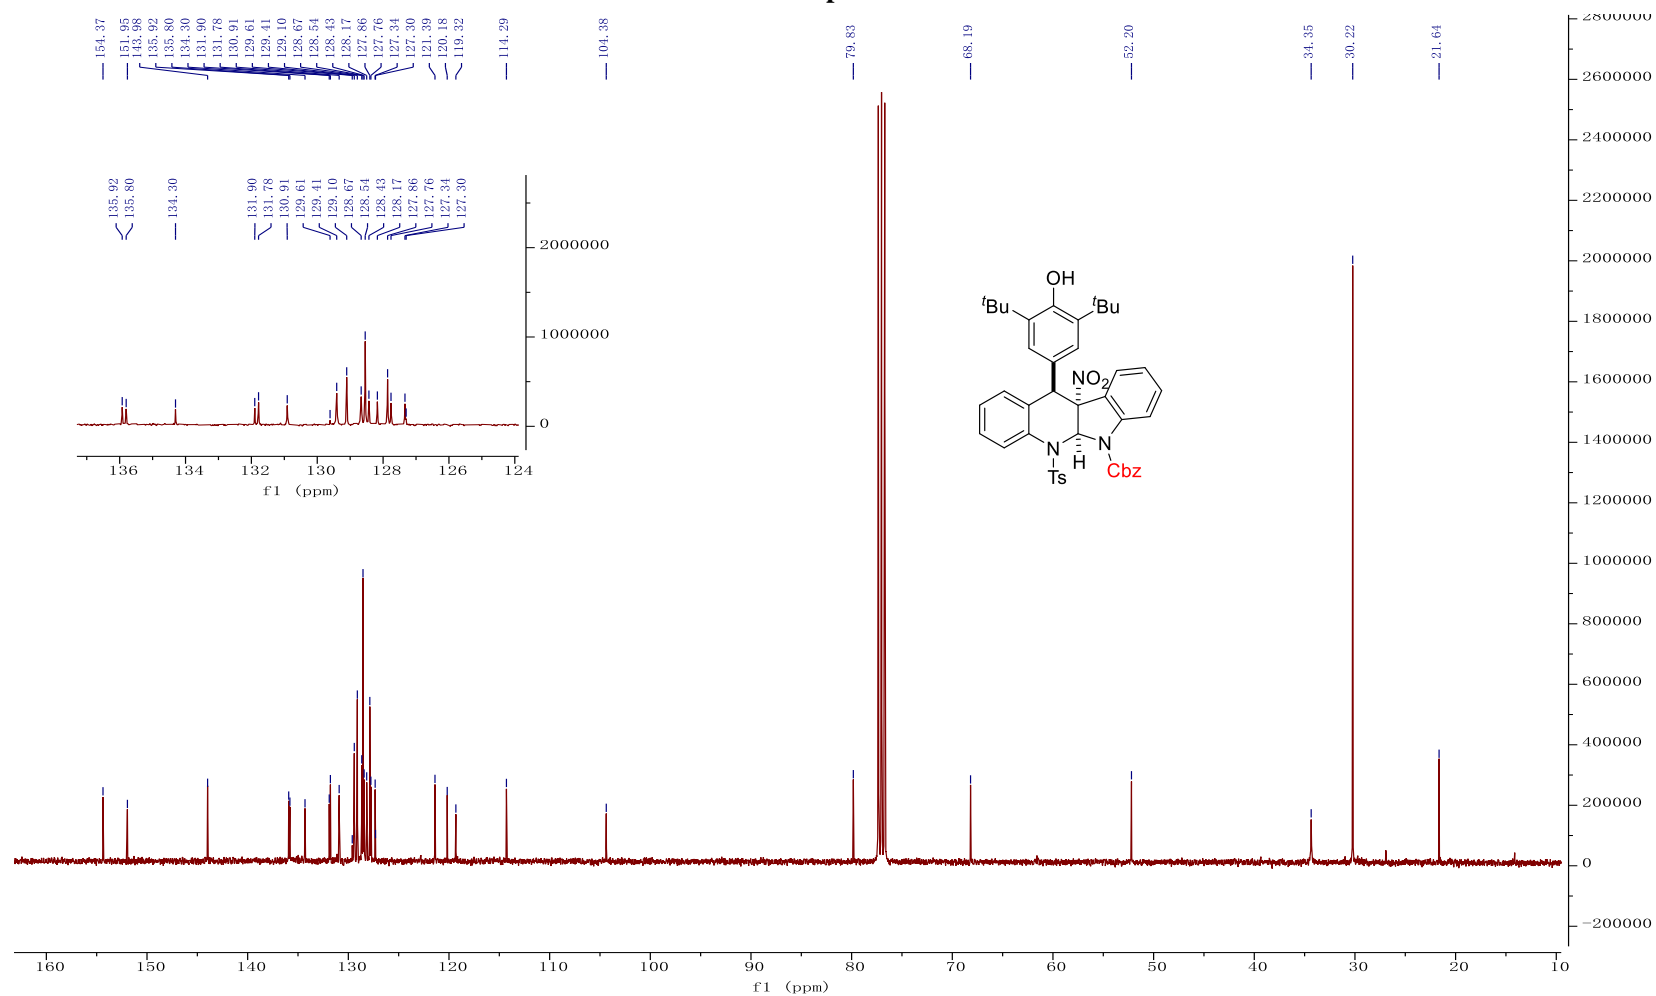

# <sup>1</sup>H NMR spectrum of 3f

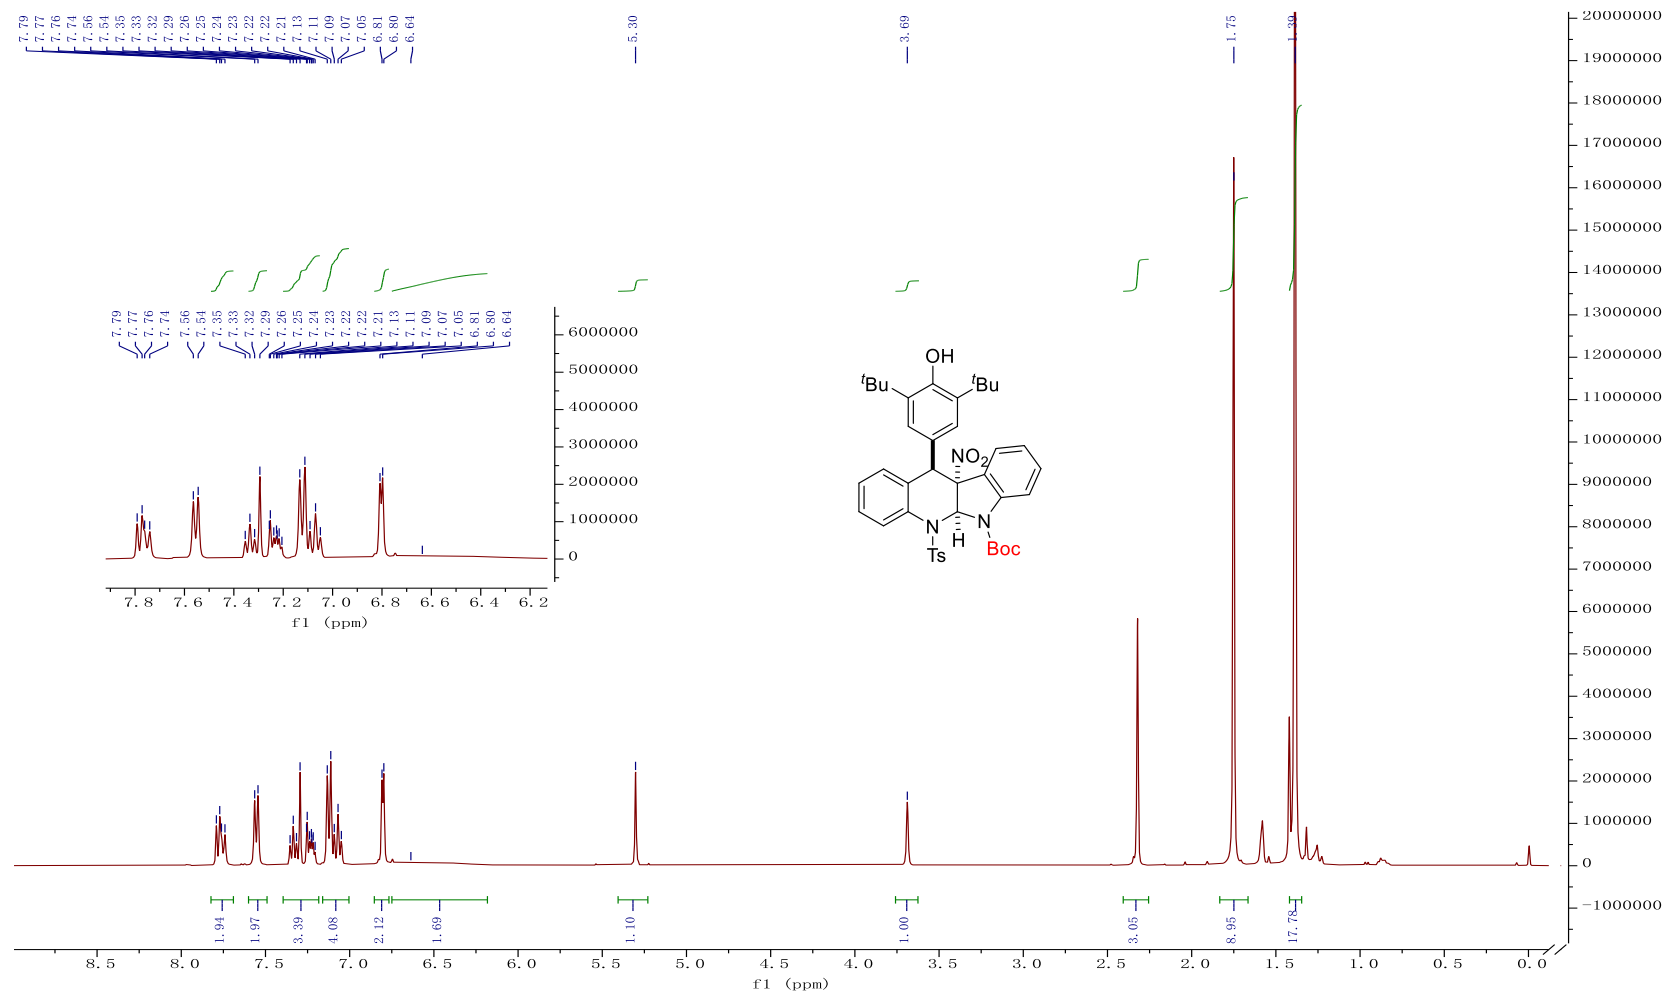

<sup>13</sup>C NMR spectrum of 3f

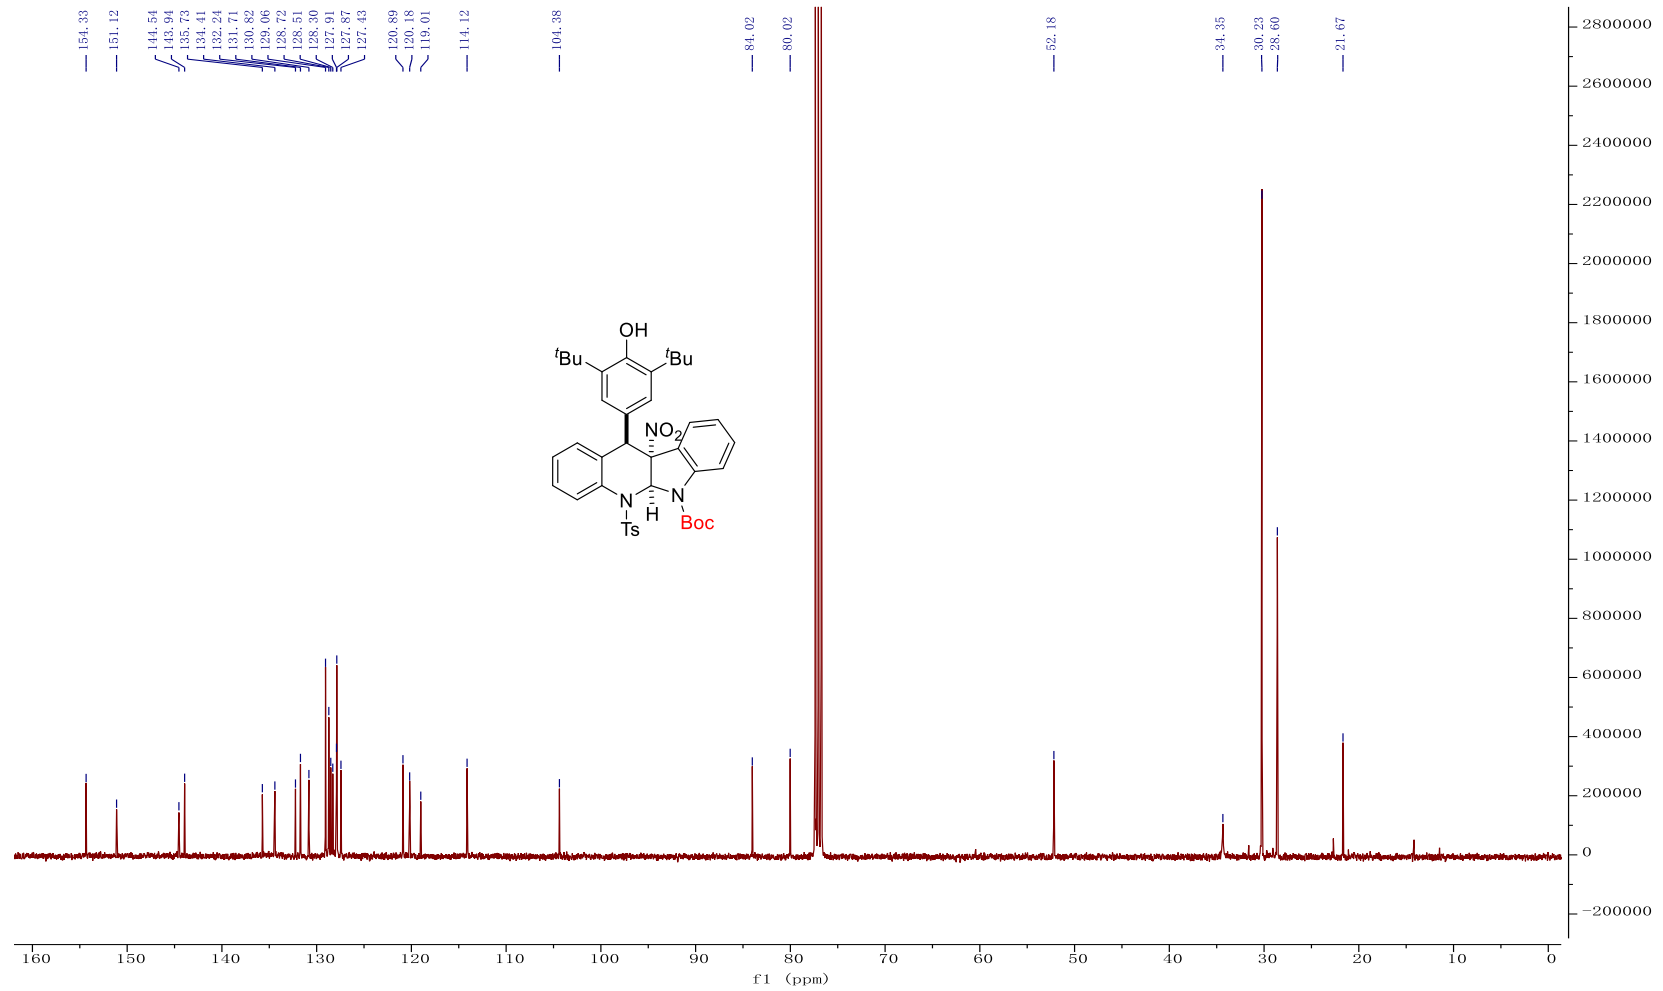

<sup>1</sup>H NMR spectrum of 3g

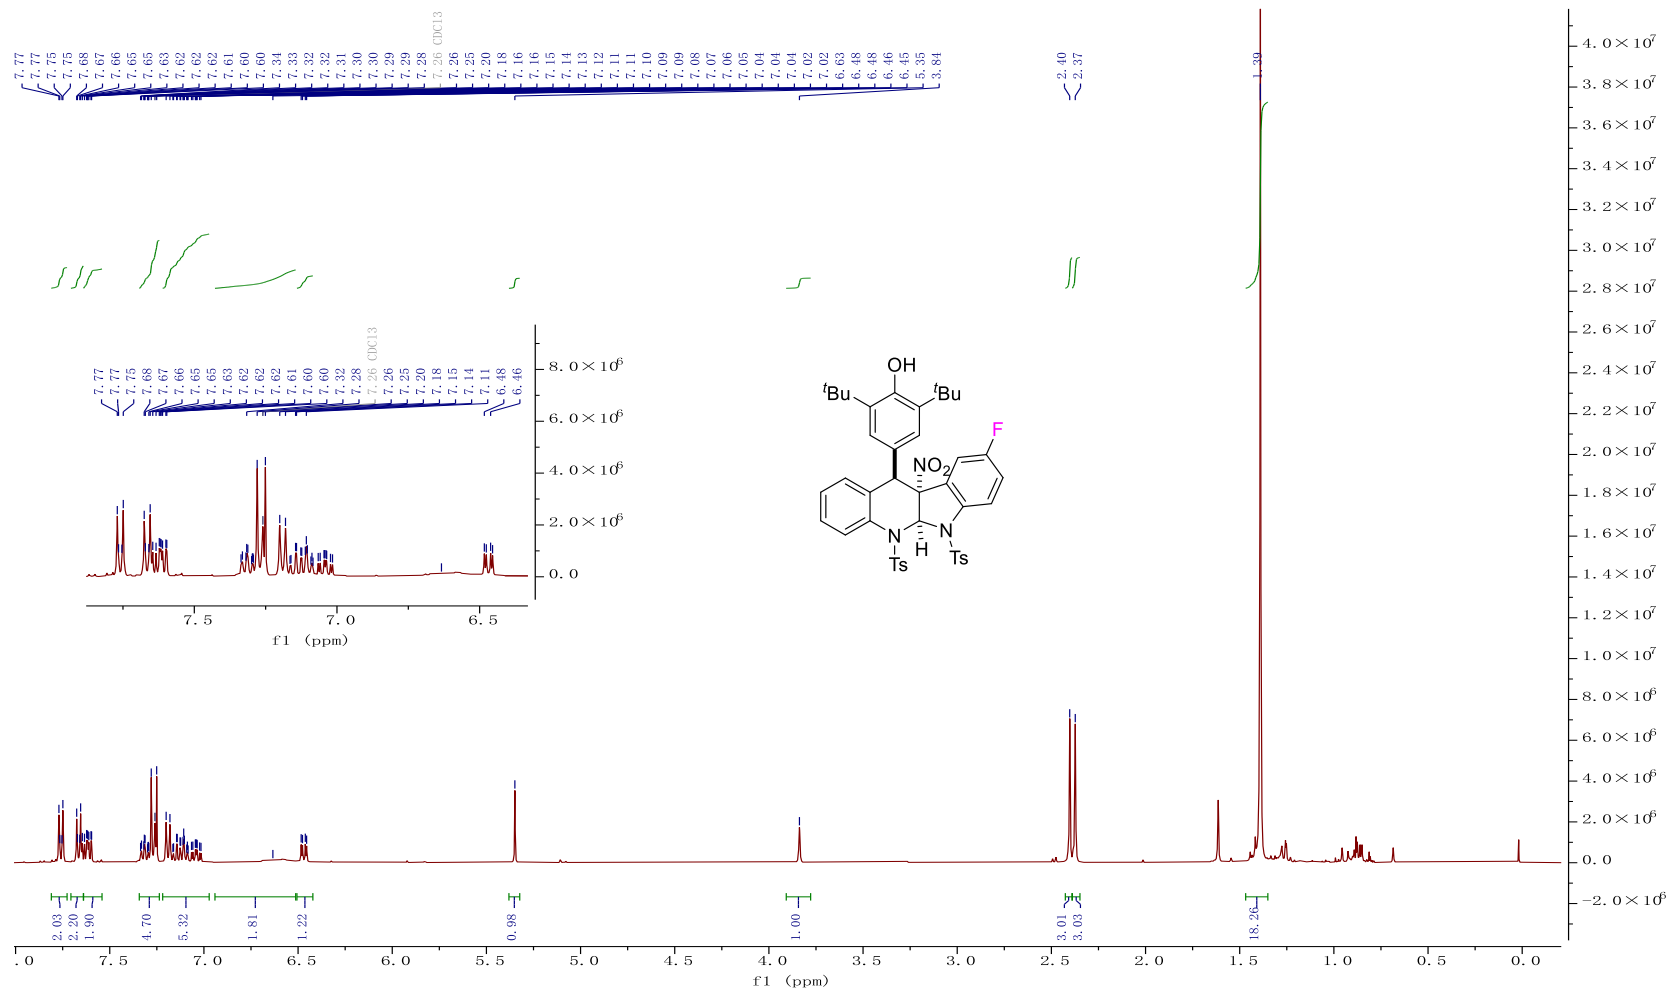

**<sup>13</sup>C NMR spectrum of 3g**

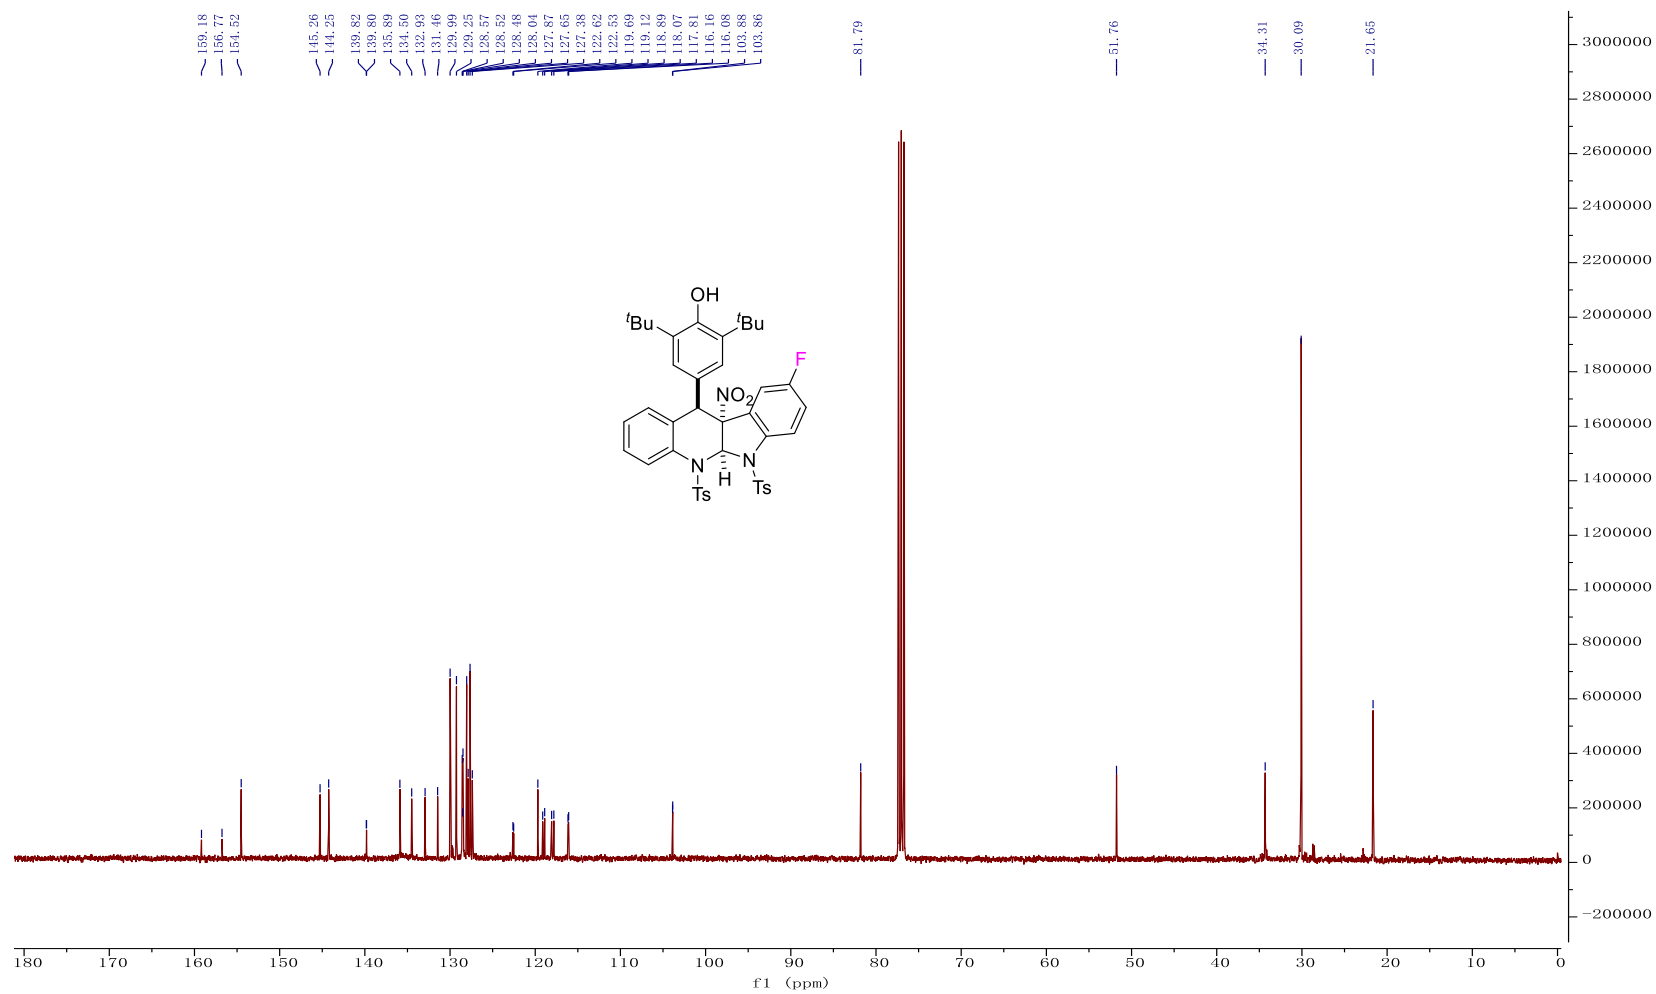

### HPLC spectra of 3g

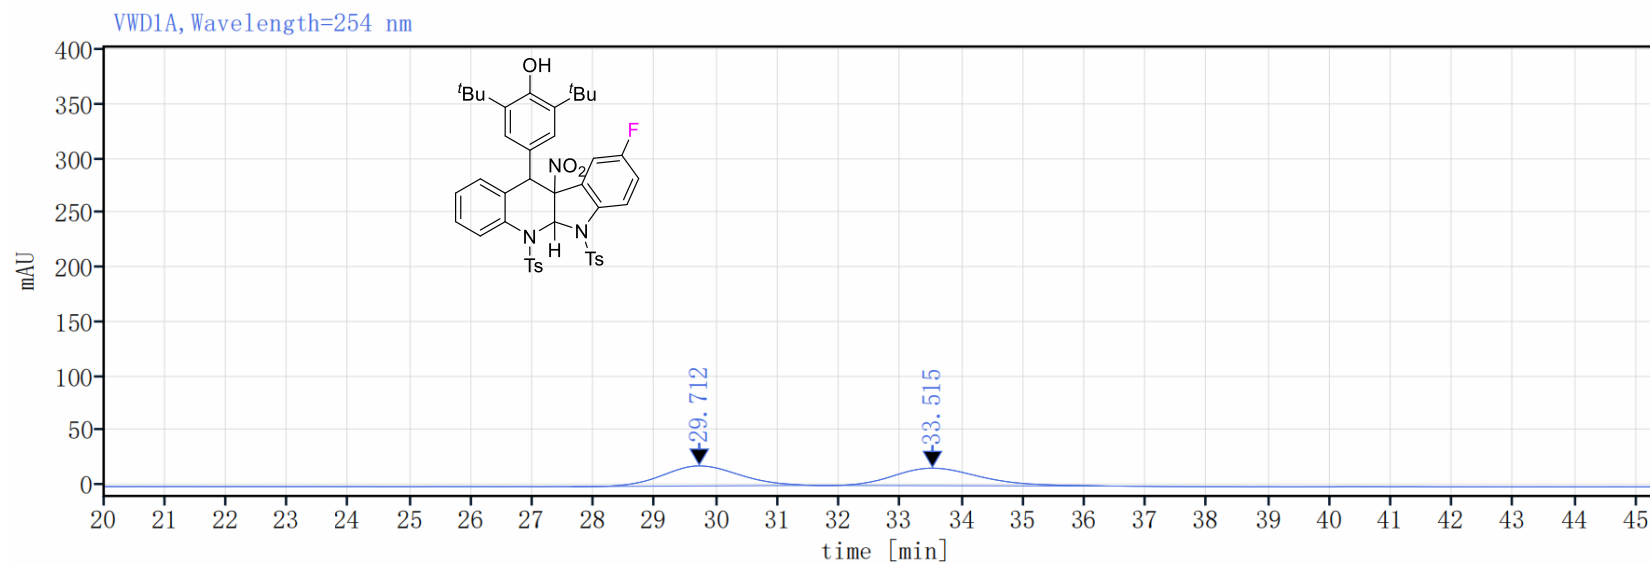

Detector VWD1A, Wavelength=254 nm

| Peak | Ret. Time [min] | Area    | Height | Area%  |
|------|-----------------|---------|--------|--------|
|      | 29.712          | 1587.86 | 18.47  | 50.38  |
|      | 33.515          | 1563.64 | 16.10  | 49.62  |
|      |                 | 3151.50 |        | 100.00 |

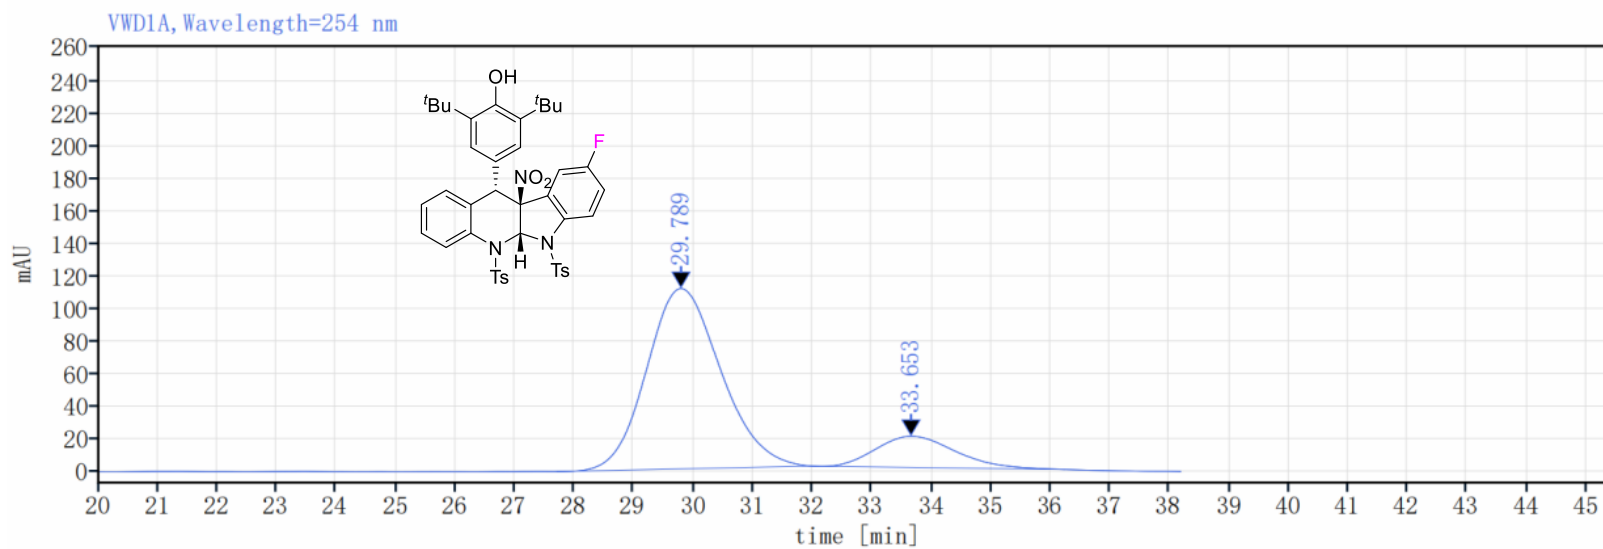

Detector VWD1A, Wavelength=254 nm

| Peak | Ret. Time [min] | Area     | Height | Area%  |
|------|-----------------|----------|--------|--------|
|      | 29.789          | 9564.71  | 110.50 | 84.40  |
|      | 33.653          | 1767.98  | 19.05  | 15.60  |
|      |                 | 11332.69 |        | 100.00 |

# <sup>1</sup>H NMR spectrum of 3h

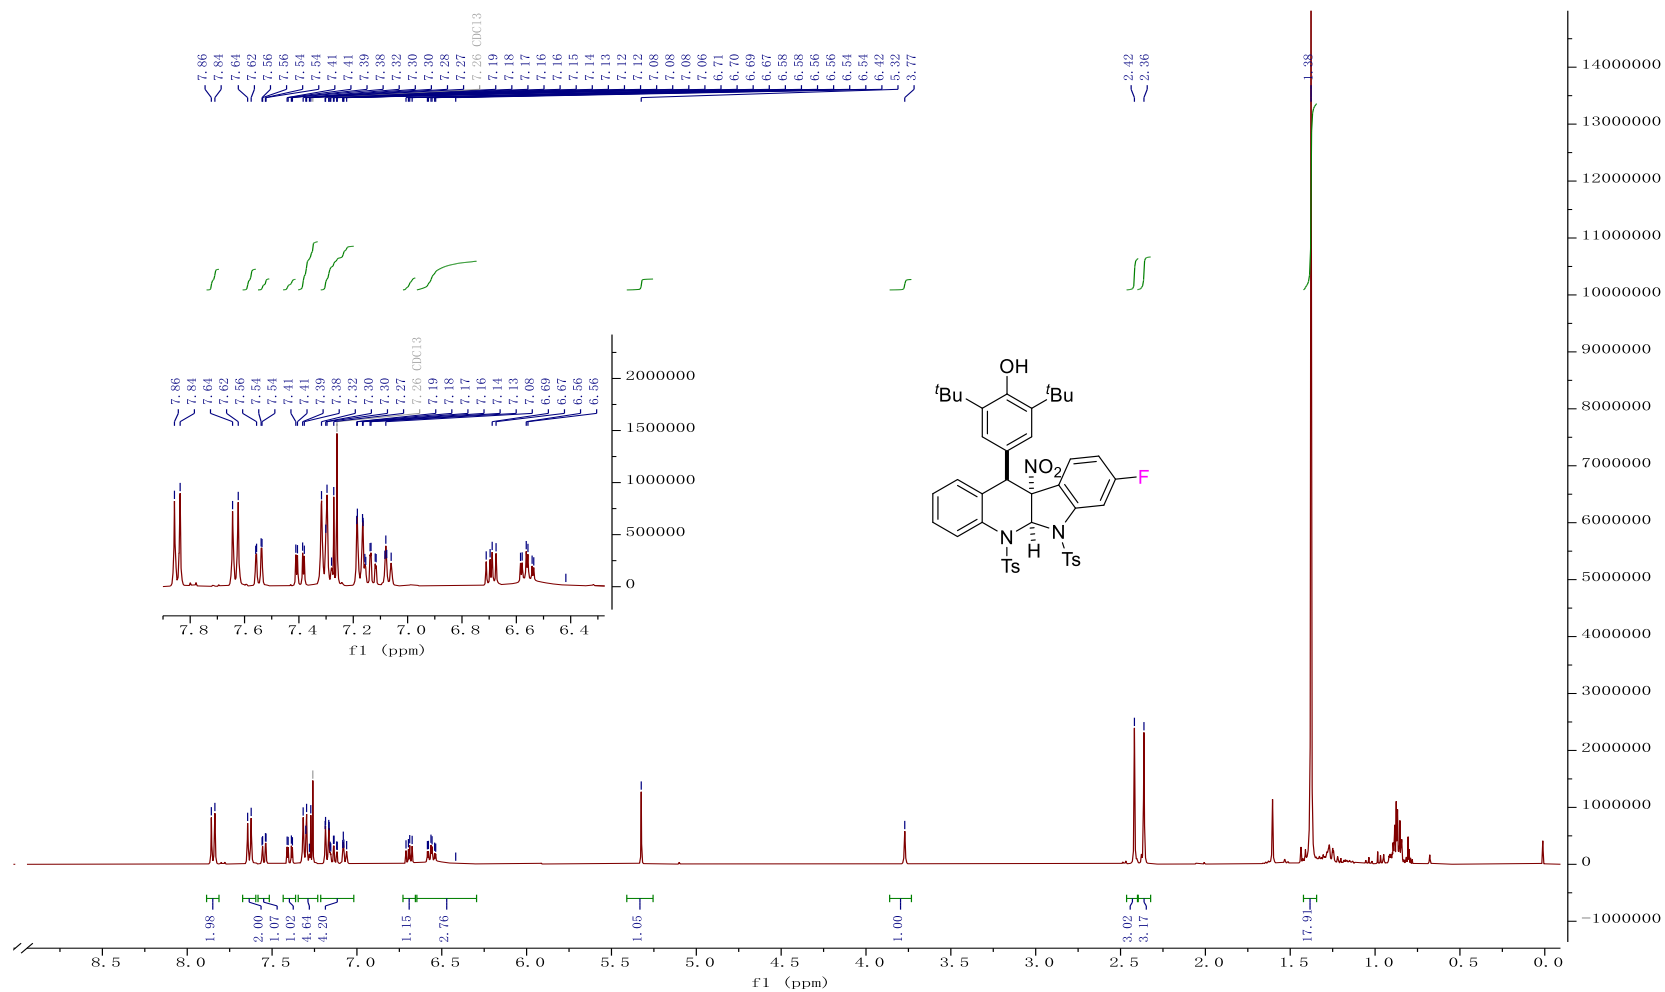



<sup>13</sup>C NMR spectrum of compound of 3h

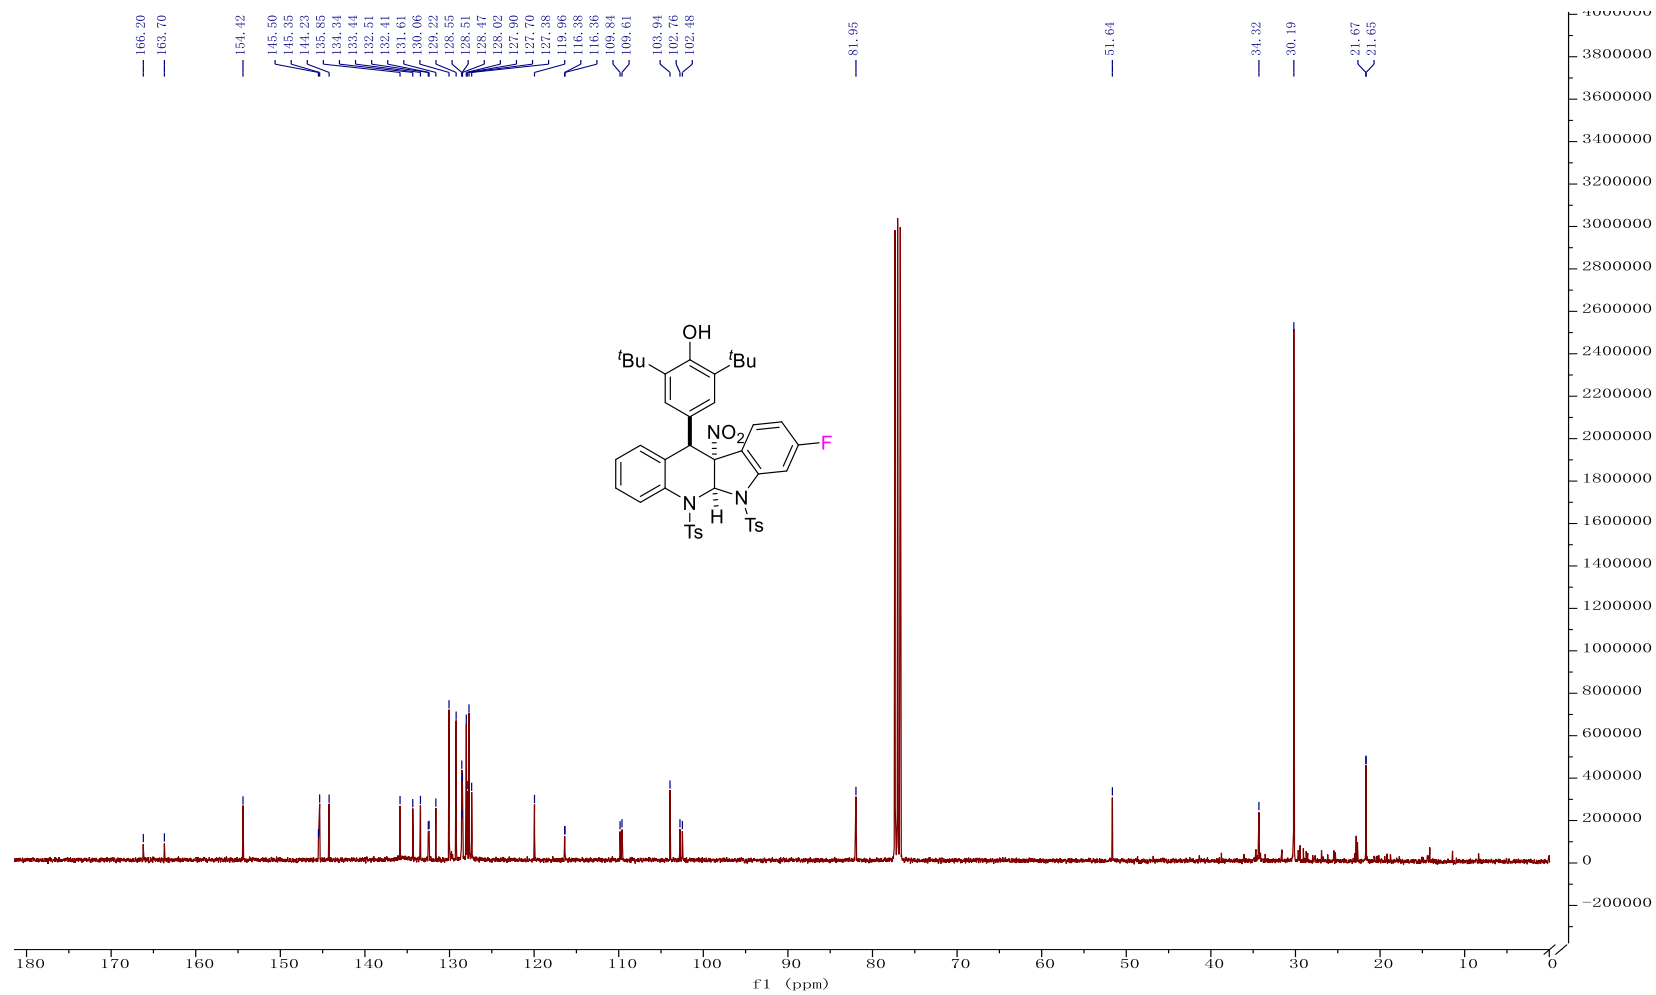

### HPLC spectra of 3h

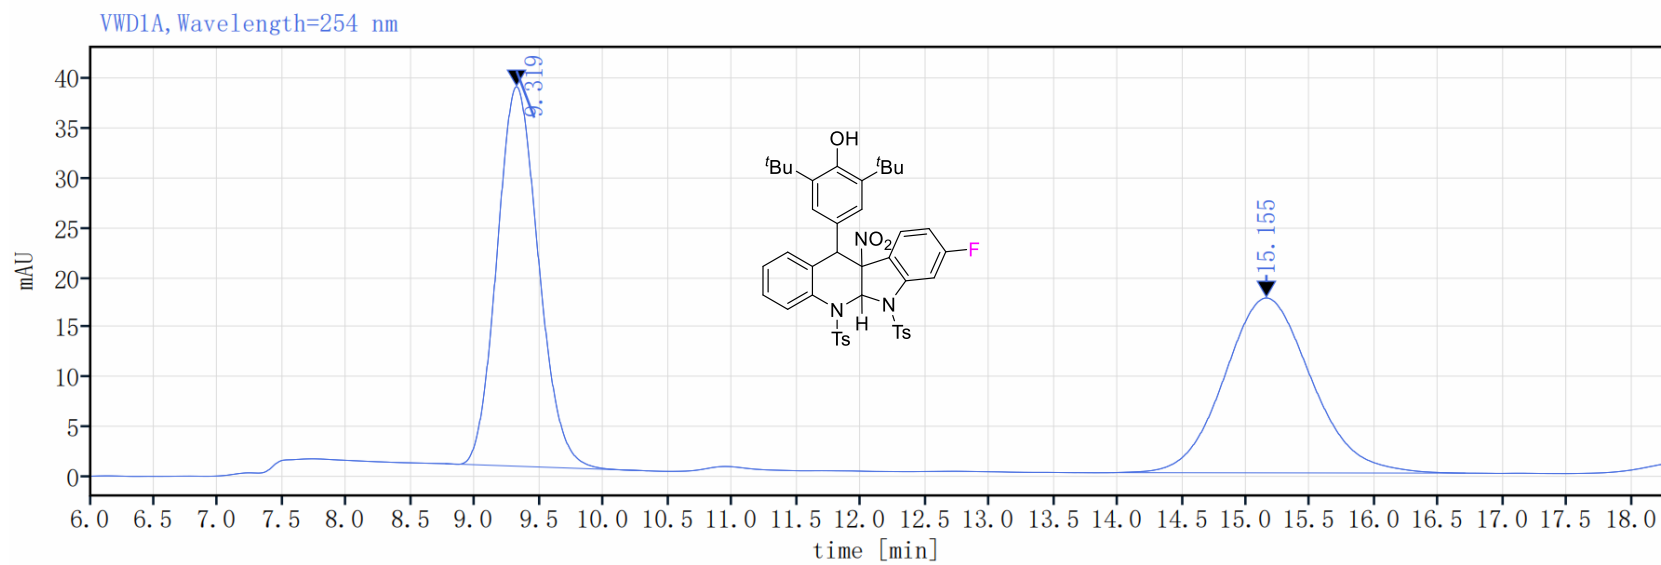

Detector VWD1A, Wavelength=254 nm

| Peak | Ret.Time [min] | Area    | Height | Area%  |
|------|----------------|---------|--------|--------|
|      | 9.319          | 857.98  | 38.07  | 50.93  |
|      | 15.155         | 826.70  | 17.55  | 49.07  |
|      |                | 1684.68 |        | 100.00 |

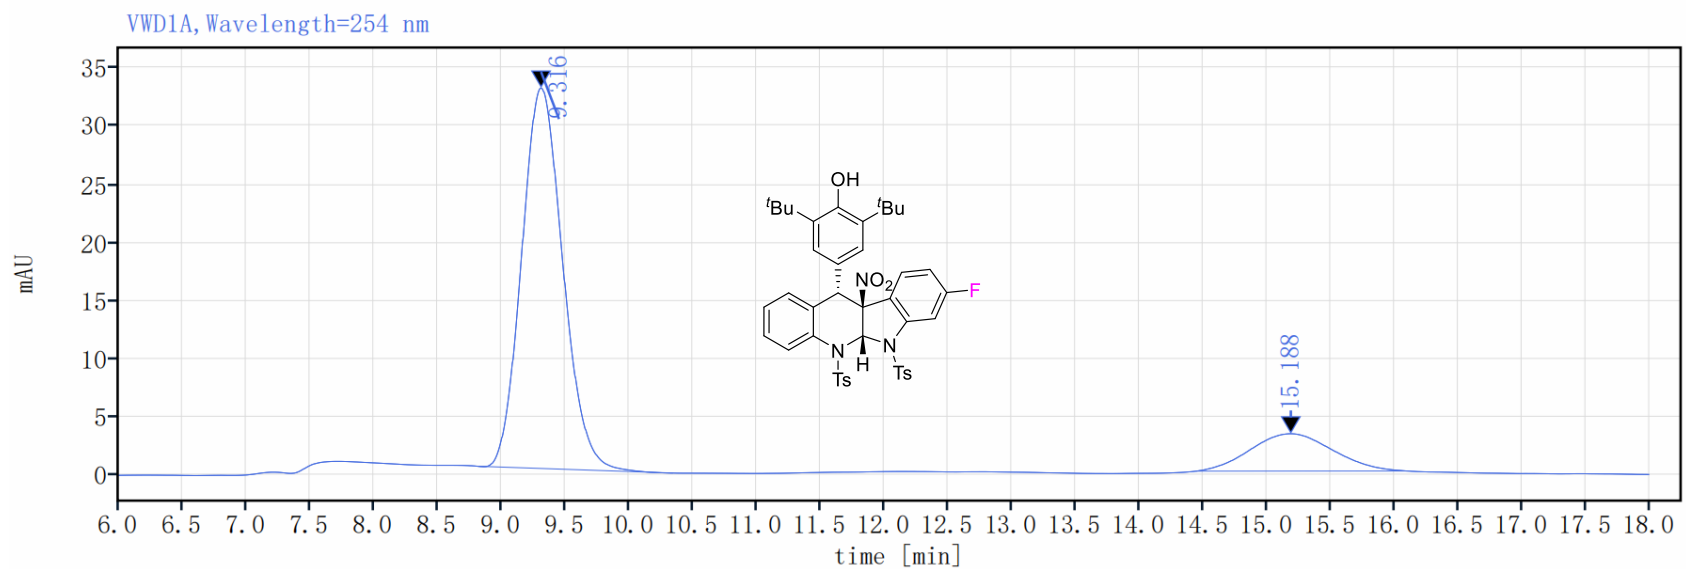

Detector VWD1A, Wavelength=254 nm

| Peak | Ret. Time [min] | Area   | Height | Area%  |
|------|-----------------|--------|--------|--------|
|      | 9.316           | 733.17 | 32.68  | 83.64  |
|      | 15.188          | 143.37 | 3.21   | 16.36  |
|      |                 | 876.54 |        | 100.00 |

# <sup>1</sup>H NMR spectrum of 3i

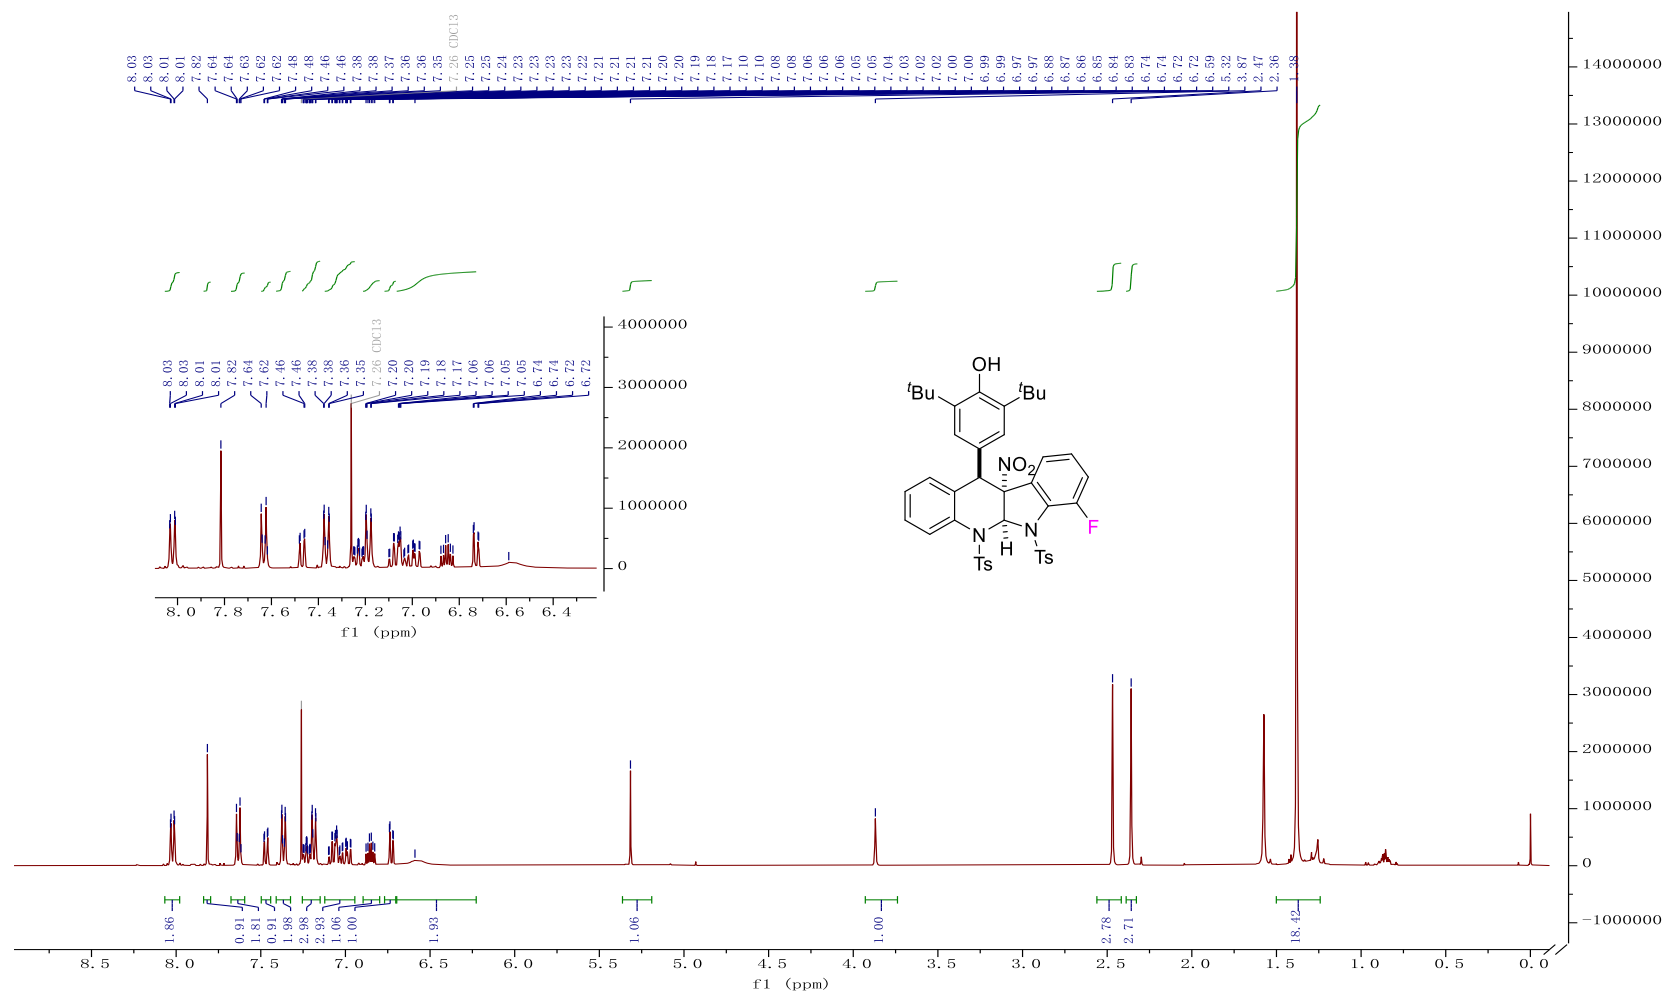

**<sup>13</sup>C NMR spectrum of 3i**

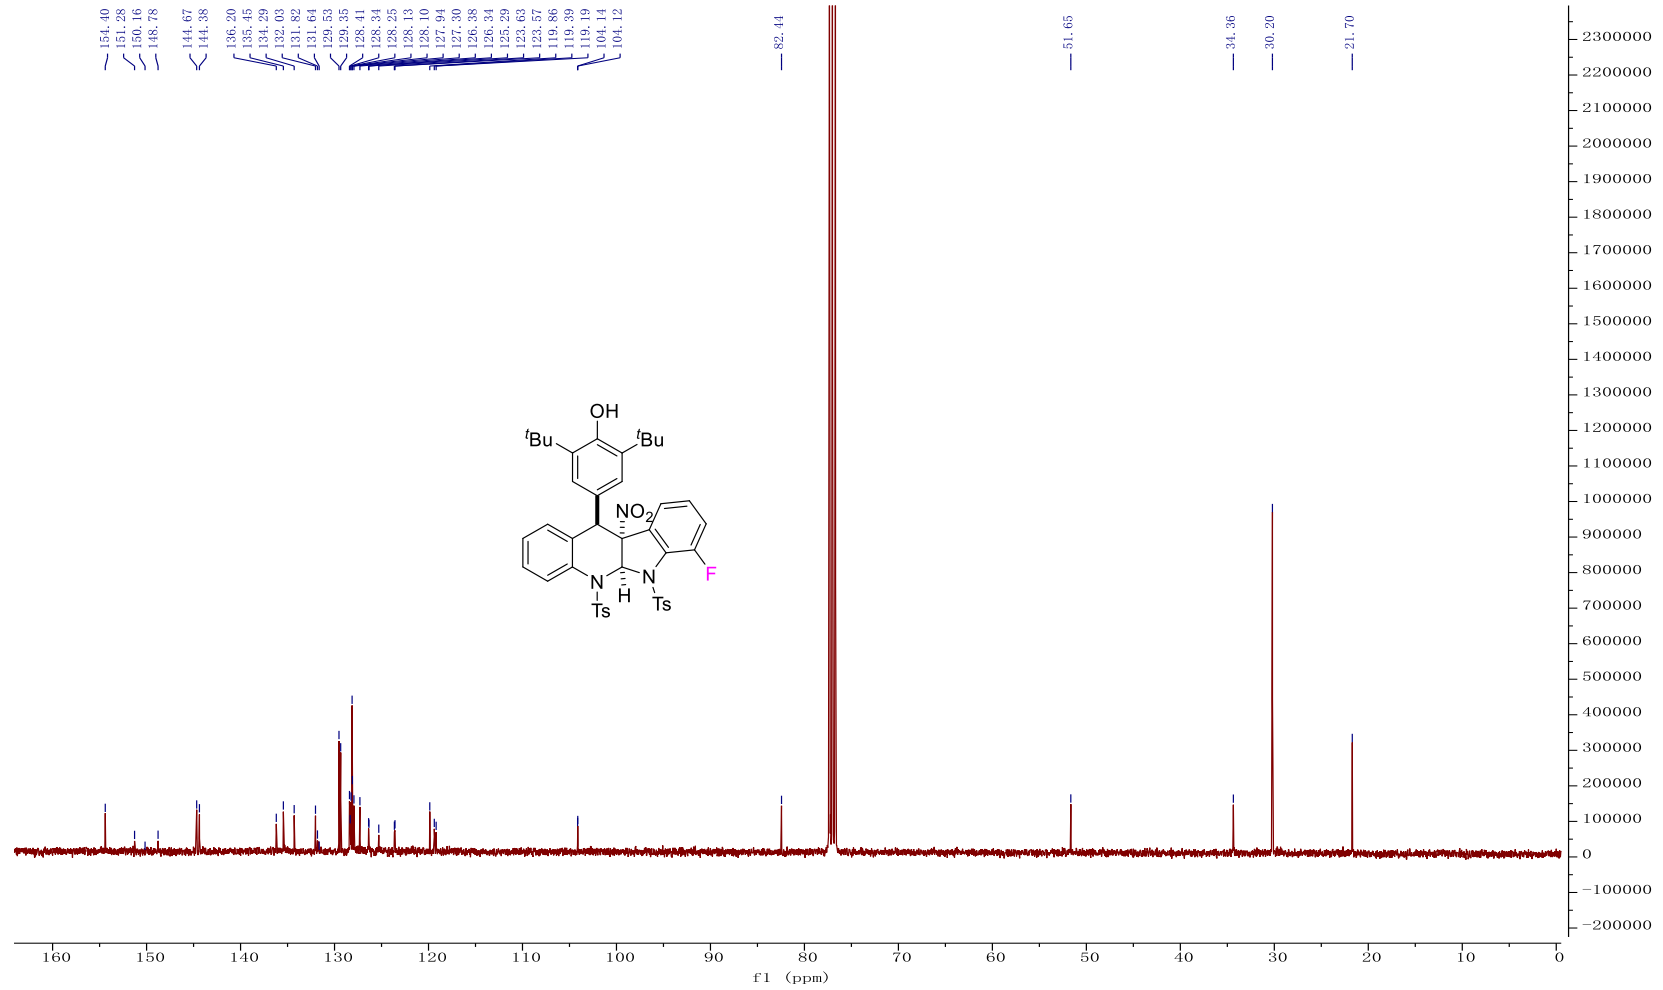

<sup>1</sup>H NMR spectrum of 3j

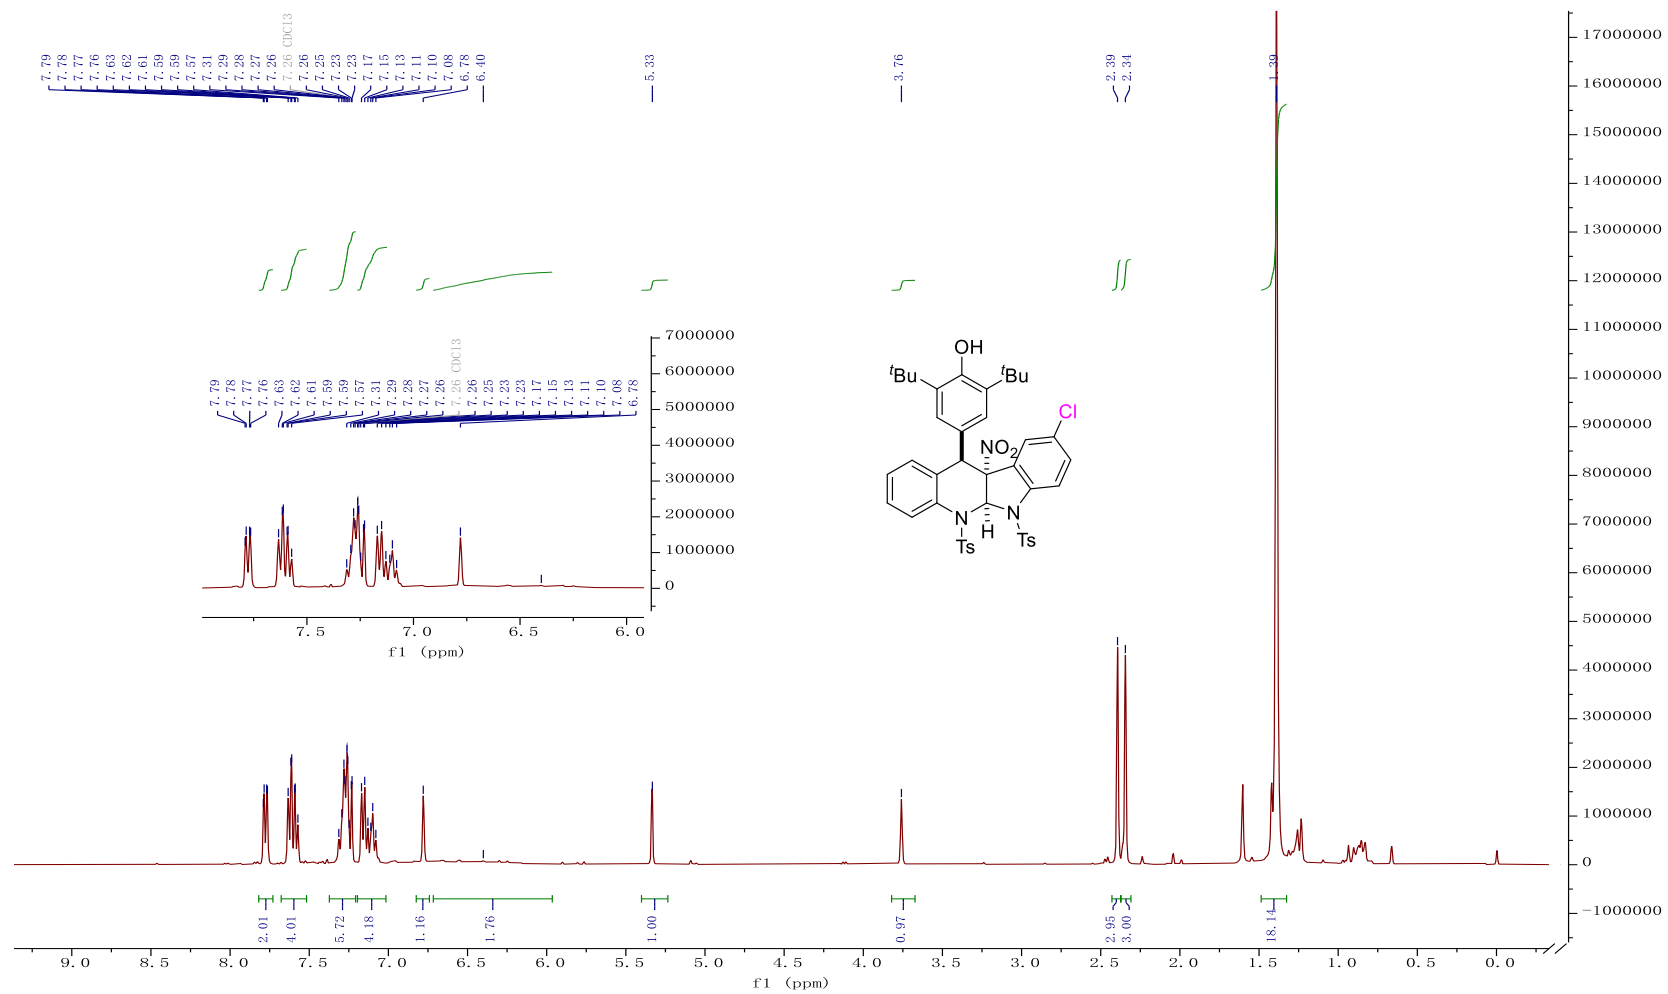

**<sup>13</sup>C NMR spectrum of 3j**

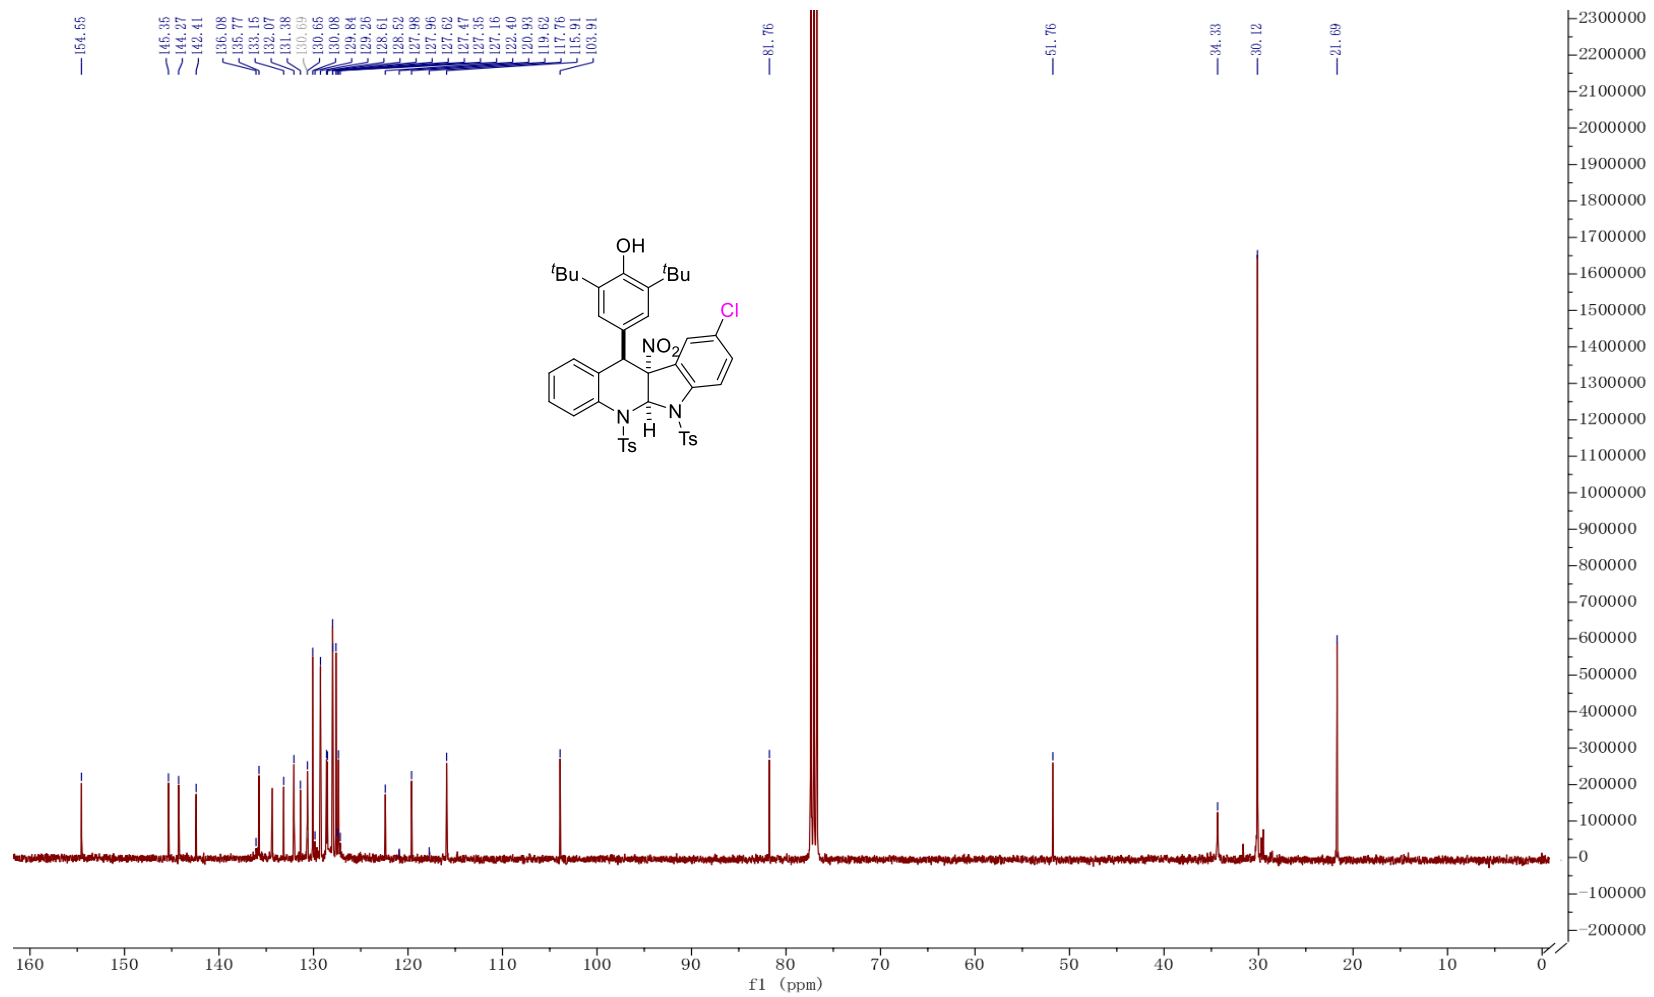

### HPLC spectra of 3j

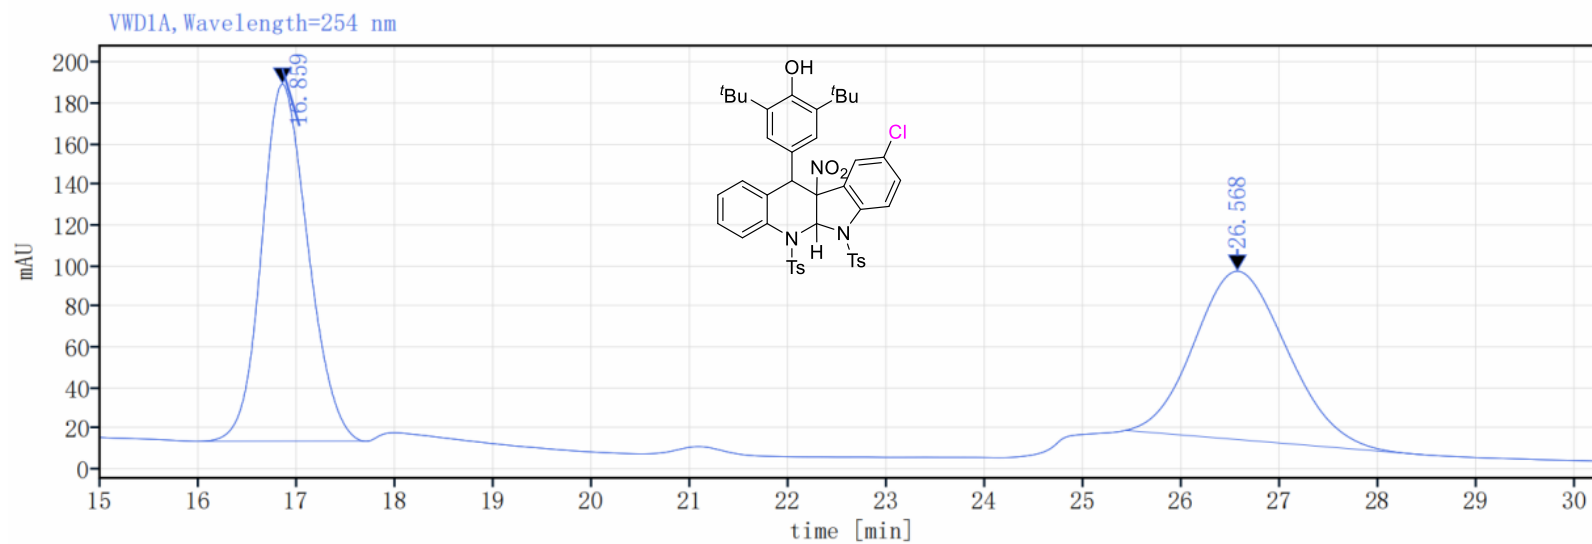

Detector VWD1A, Wavelength=254 nm

| Peak | Ret. Time [min] | Area     | Height | Area%  |
|------|-----------------|----------|--------|--------|
|      | 16.859          | 5765.13  | 175.42 | 51.48  |
|      | 26.568          | 5433.61  | 82.71  | 48.52  |
|      |                 | 11198.73 |        | 100.00 |



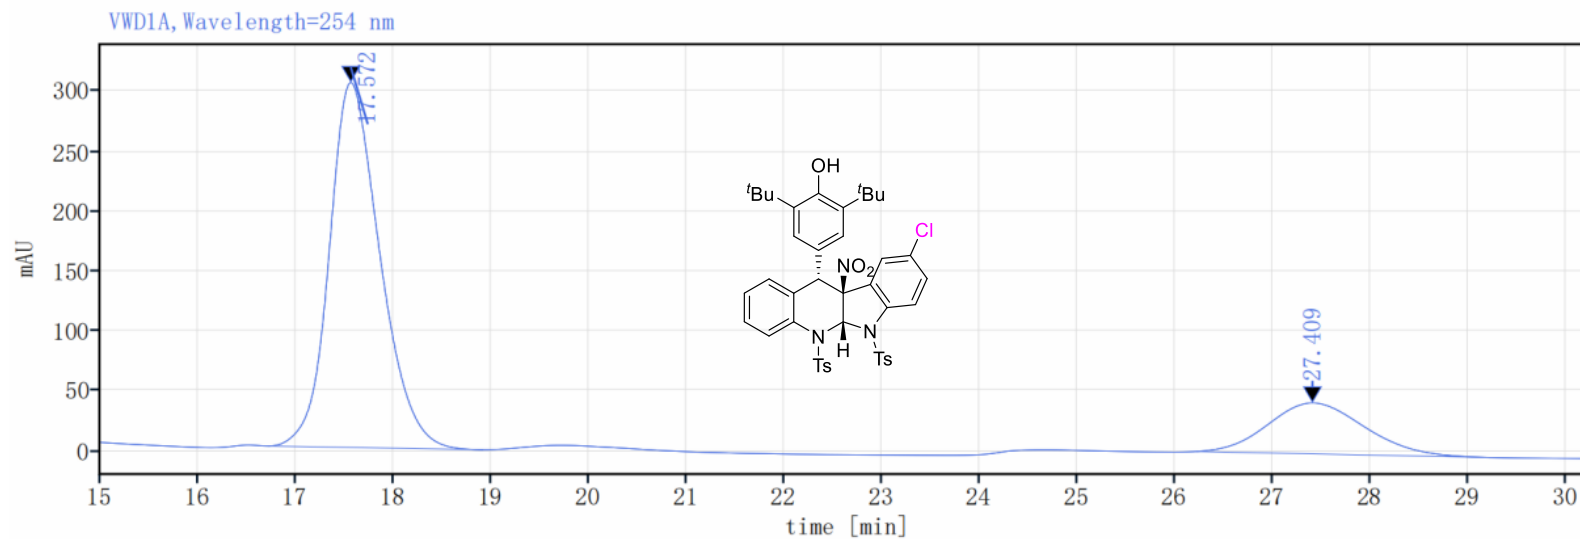

Detector VWD1A, Wavelength=254 nm

| Peak | Ret. Time [min] | Area     | Height | Area%  |
|------|-----------------|----------|--------|--------|
|      | 17.572          | 10997.89 | 304.53 | 79.08  |
|      | 27.409          | 2909.90  | 42.47  | 20.92  |
|      |                 | 13907.79 |        | 100.00 |

# <sup>1</sup>H NMR spectrum of 3k

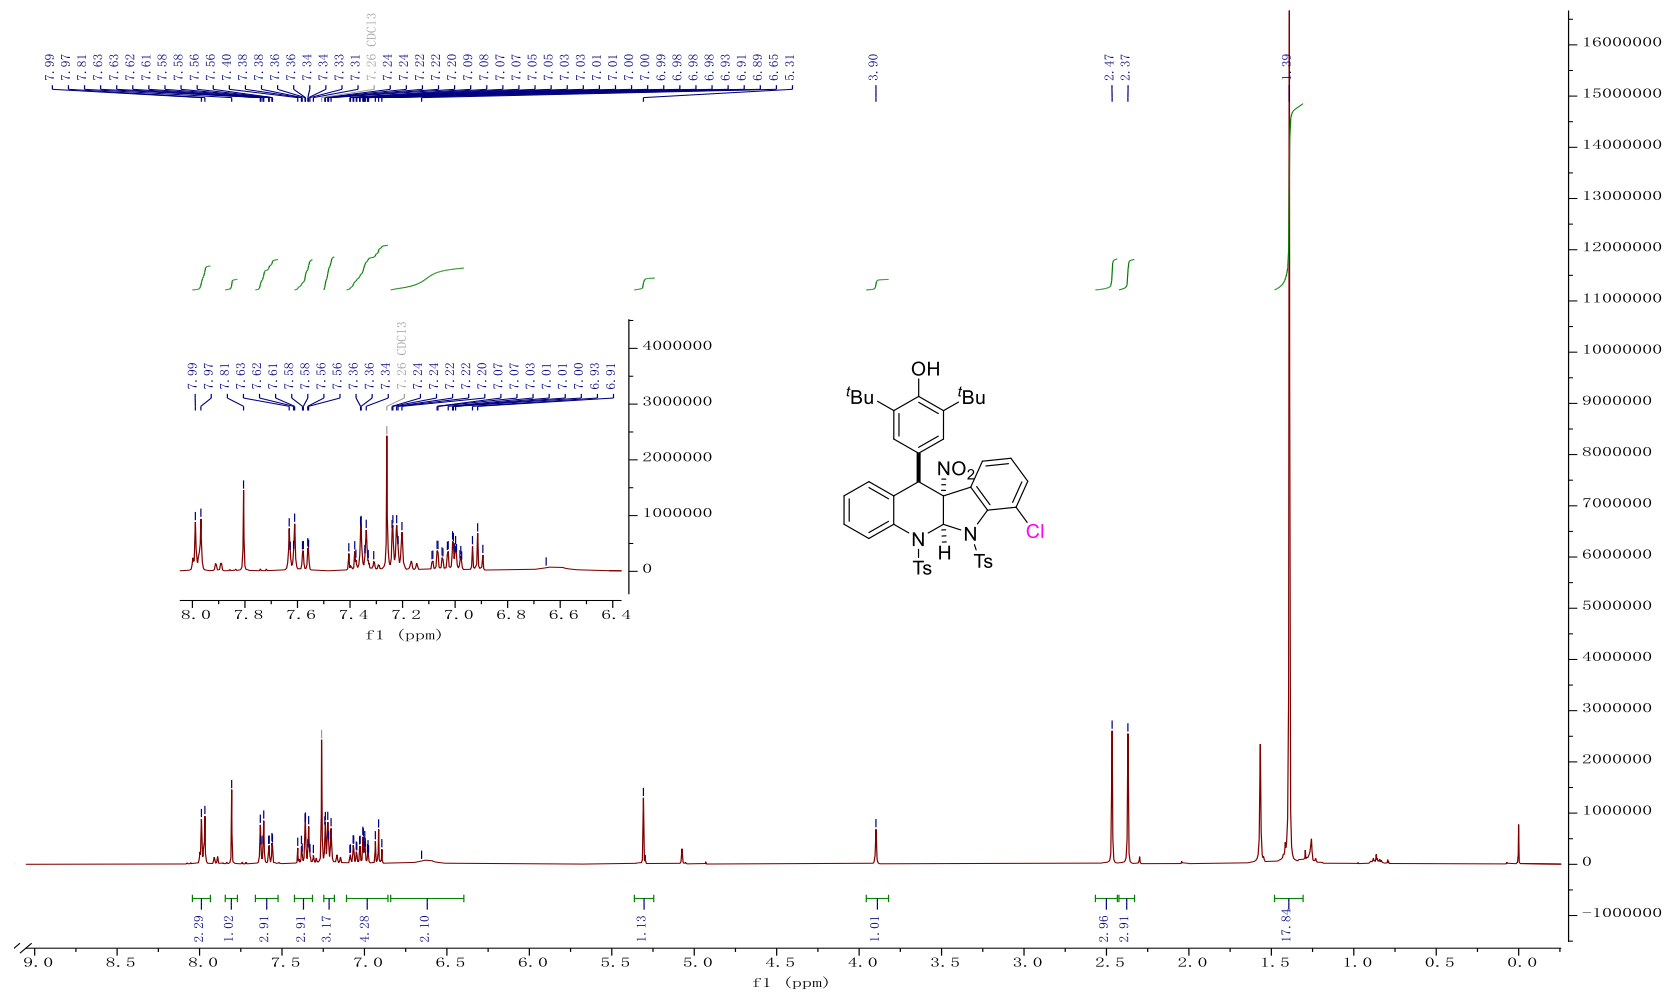

**<sup>13</sup>C NMR spectrum of 3k**

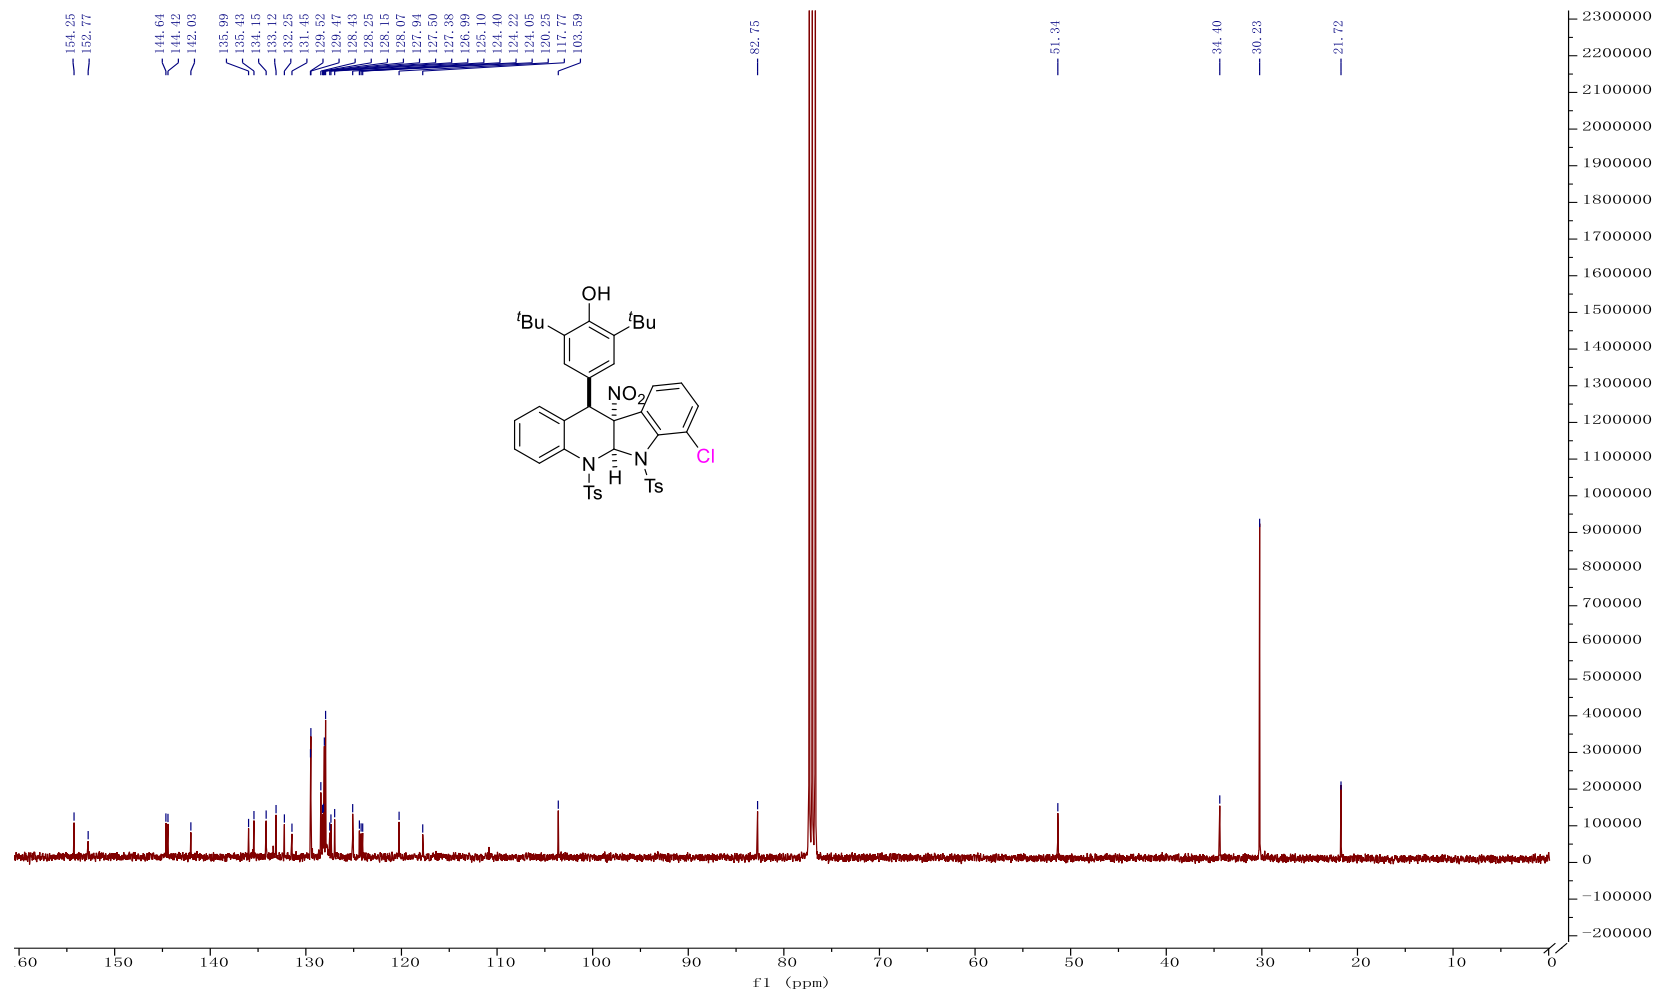

# <sup>1</sup>H NMR spectrum of 3l

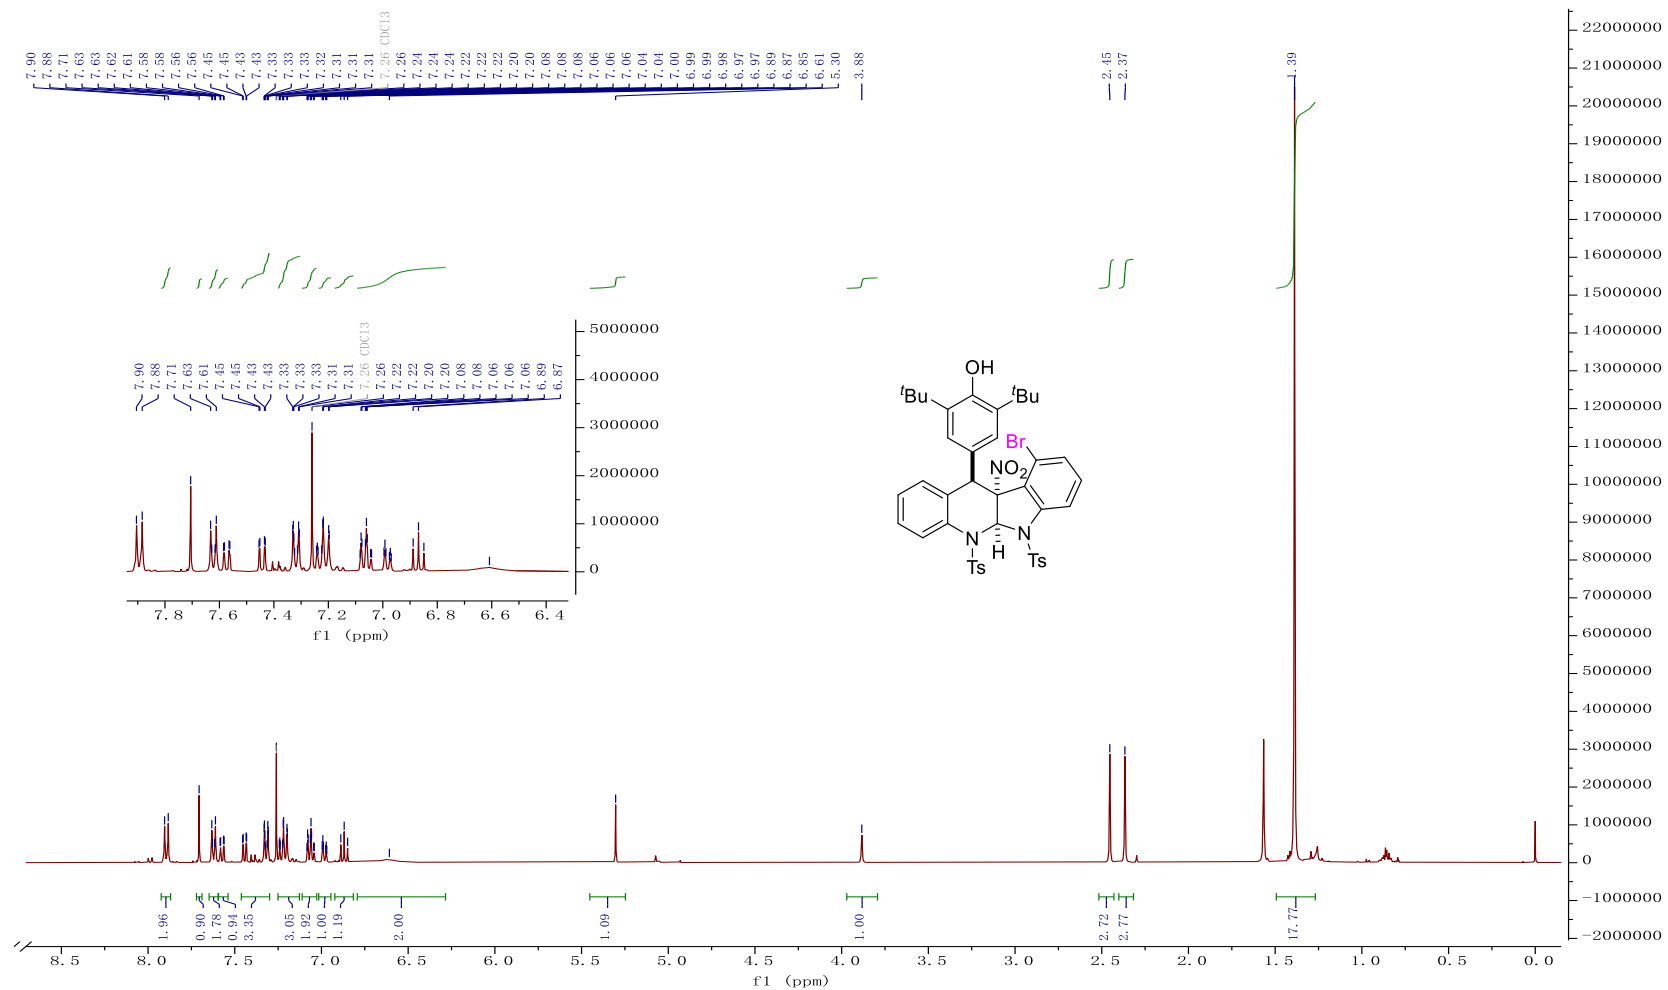

**<sup>13</sup>C NMR spectrum of 3l**

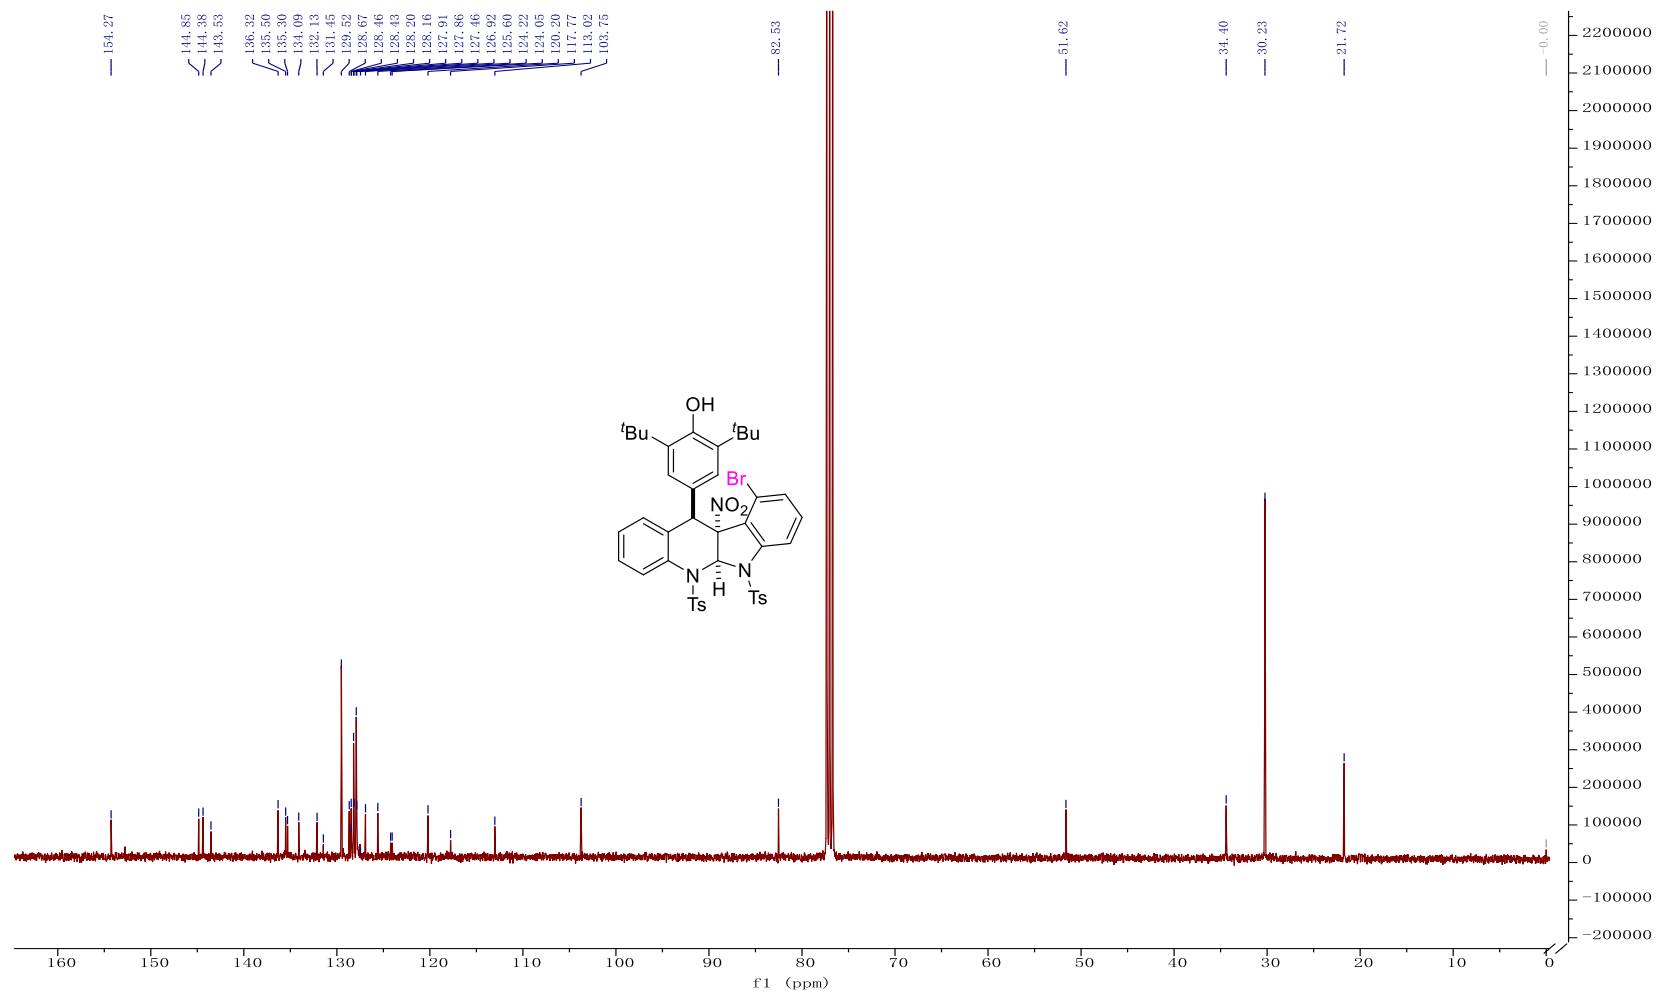

### HPLC spectra of 3l

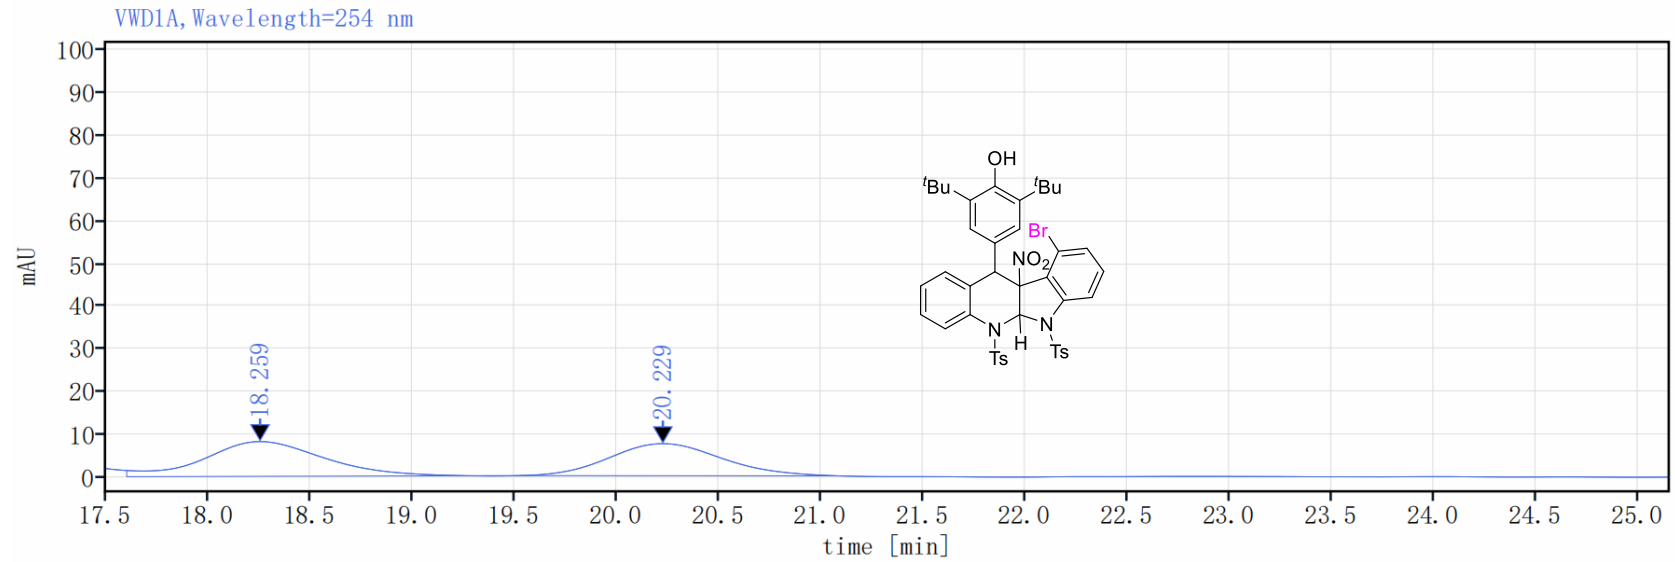

Detector VWD1A, Wavelength=254 nm

| Peak | Ret. Time [min] | Area   | Height | Area%  |
|------|-----------------|--------|--------|--------|
|      | 18.259          | 330.64 | 8.14   | 53.59  |
|      | 20.229          | 286.40 | 7.50   | 46.41  |
|      |                 | 617.04 |        | 100.00 |

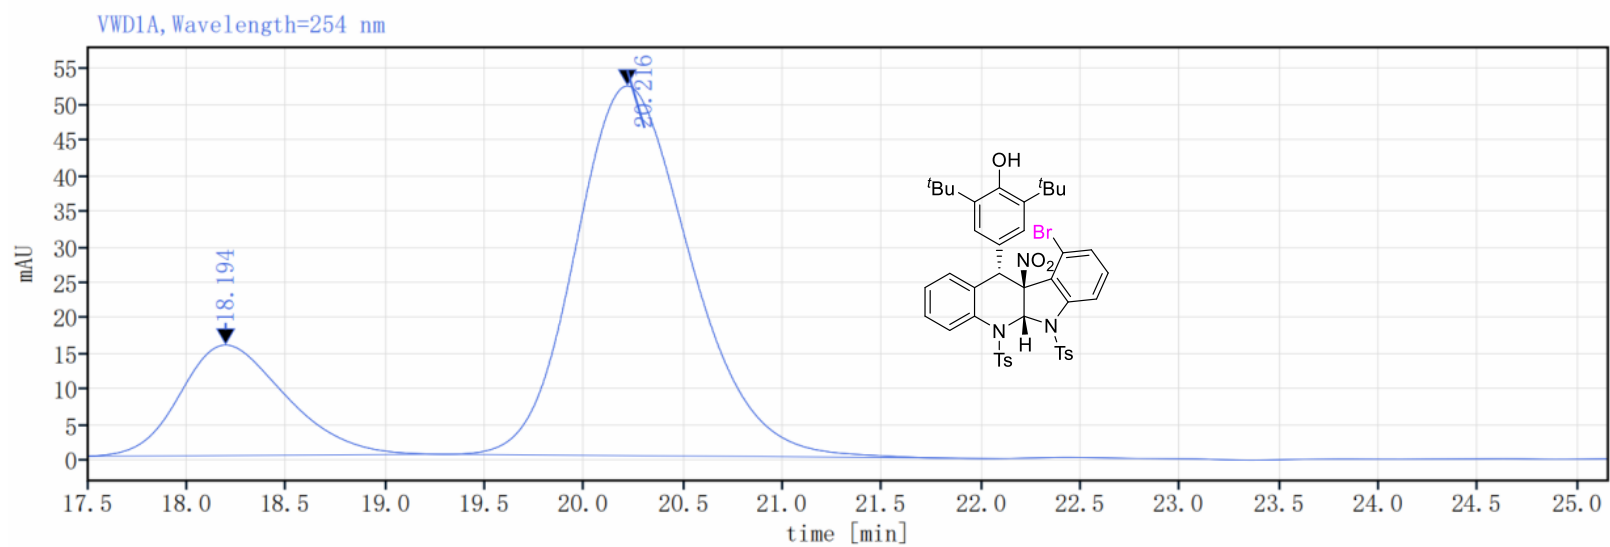

Detector VWD1A, Wavelength=254 nm

| Peak | Ret.Time [min] | Area    | Height | Area%  |
|------|----------------|---------|--------|--------|
|      | 18.194         | 575.99  | 15.55  | 21.51  |
|      | 20.216         | 2101.71 | 52.05  | 78.49  |
|      |                | 2677.70 |        | 100.00 |

# <sup>1</sup>H NMR spectrum of 3m

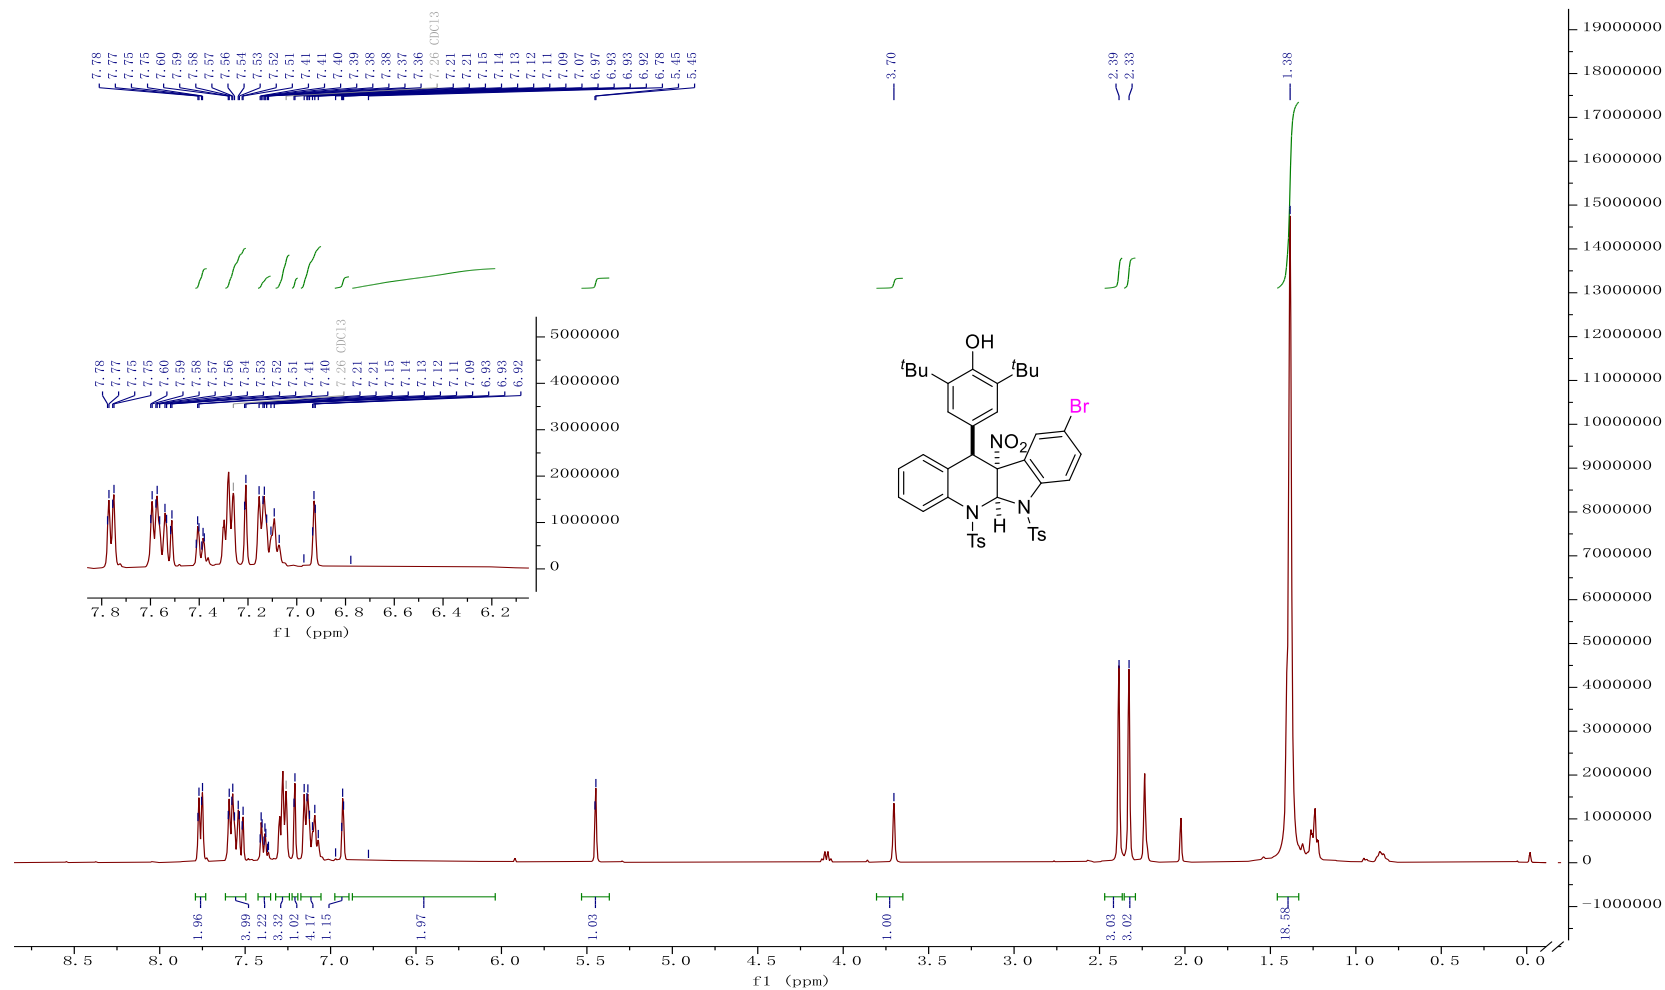



**<sup>13</sup>C NMR spectrum of 3m**

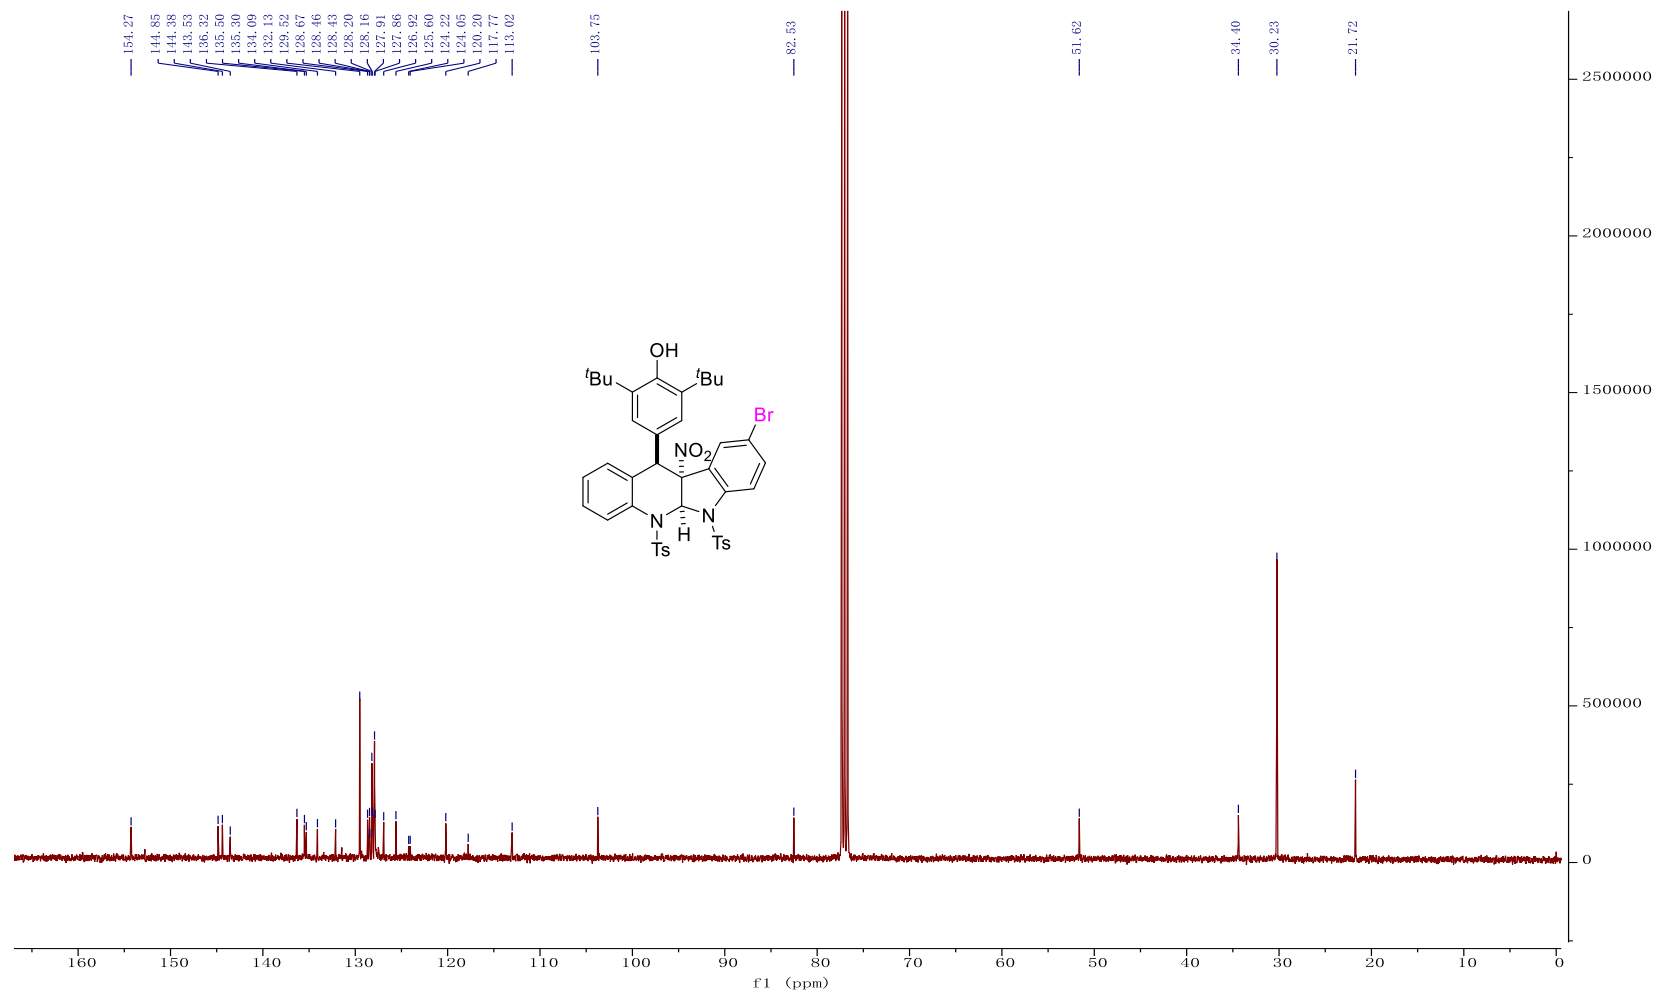

### HPLC spectra of 3m

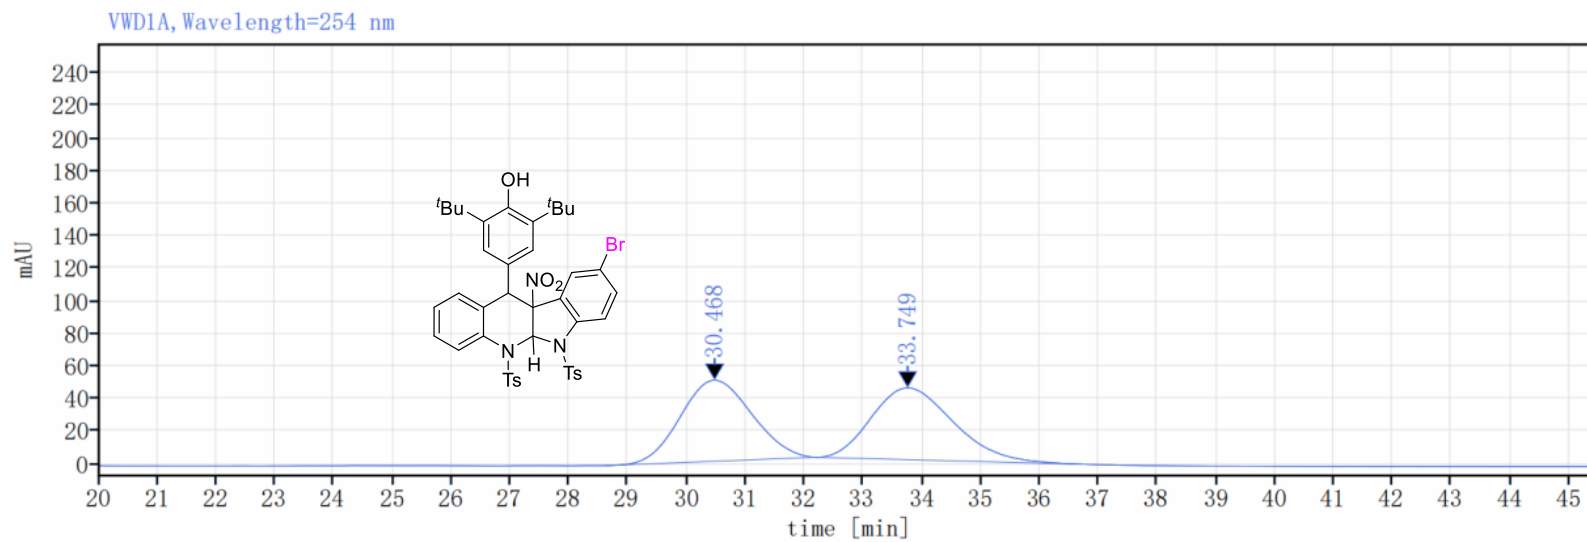

Detector VWD1A, Wavelength=254 nm

| Peak | Ret. Time [min] | Area    | Height | Area%  |
|------|-----------------|---------|--------|--------|
|      | 30.468          | 4187.63 | 49.77  | 49.55  |
|      | 33.749          | 4264.29 | 44.09  | 50.45  |
|      |                 | 8451.93 |        | 100.00 |

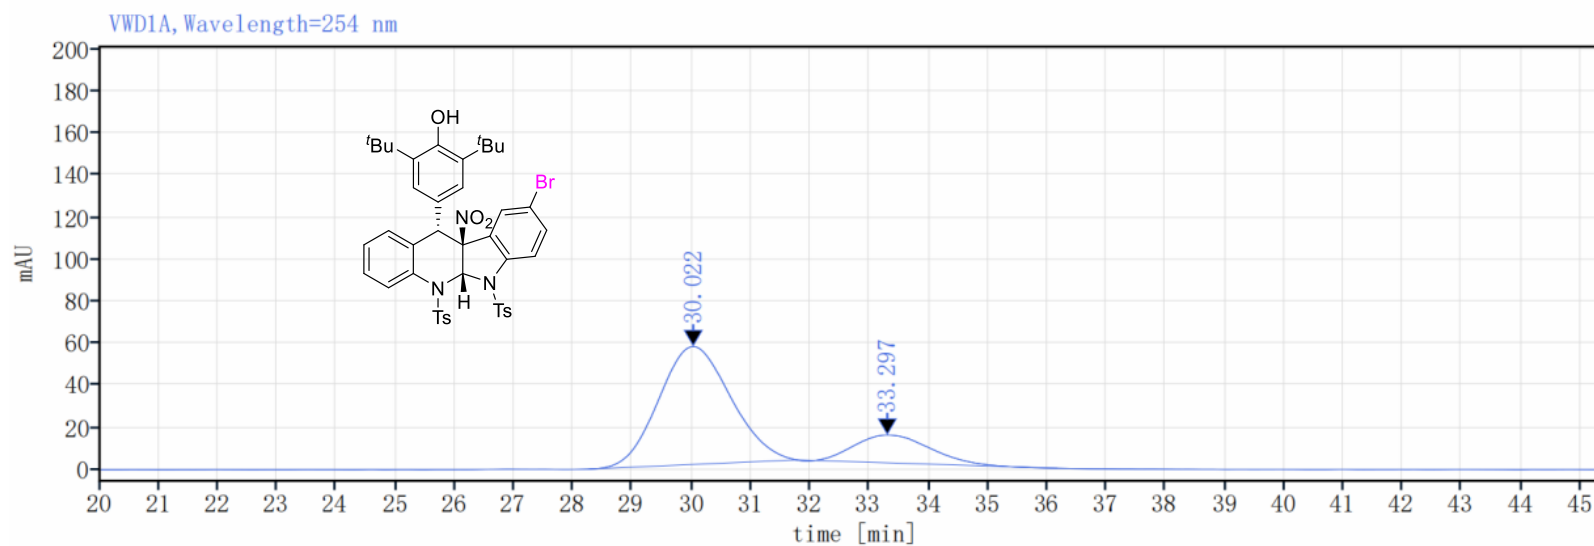

Detector VWD1A, Wavelength=254 nm

| Peak | Ret.Time [min] | Area    | Height | Area%  |
|------|----------------|---------|--------|--------|
|      | 30.022         | 4721.38 | 56.05  | 80.14  |
|      | 33.297         | 1169.83 | 13.15  | 19.86  |
|      |                | 5891.21 |        | 100.00 |

# <sup>1</sup>H NMR spectrum of 3n

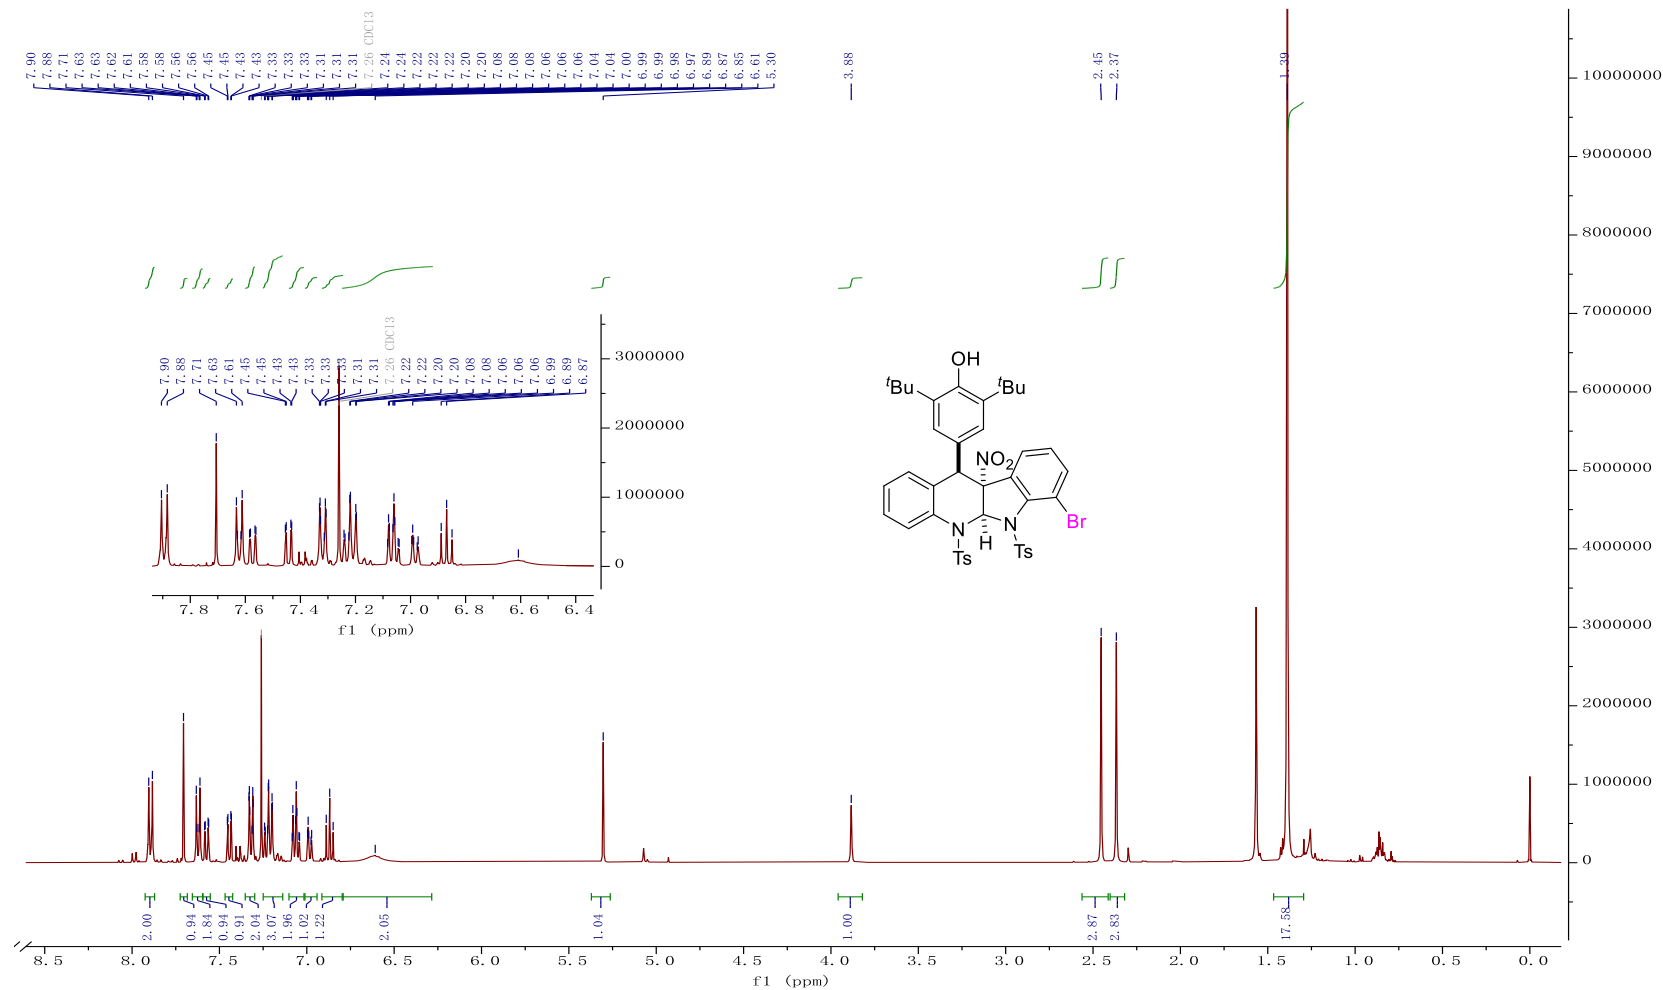

<sup>13</sup>C NMR spectrum of 3n

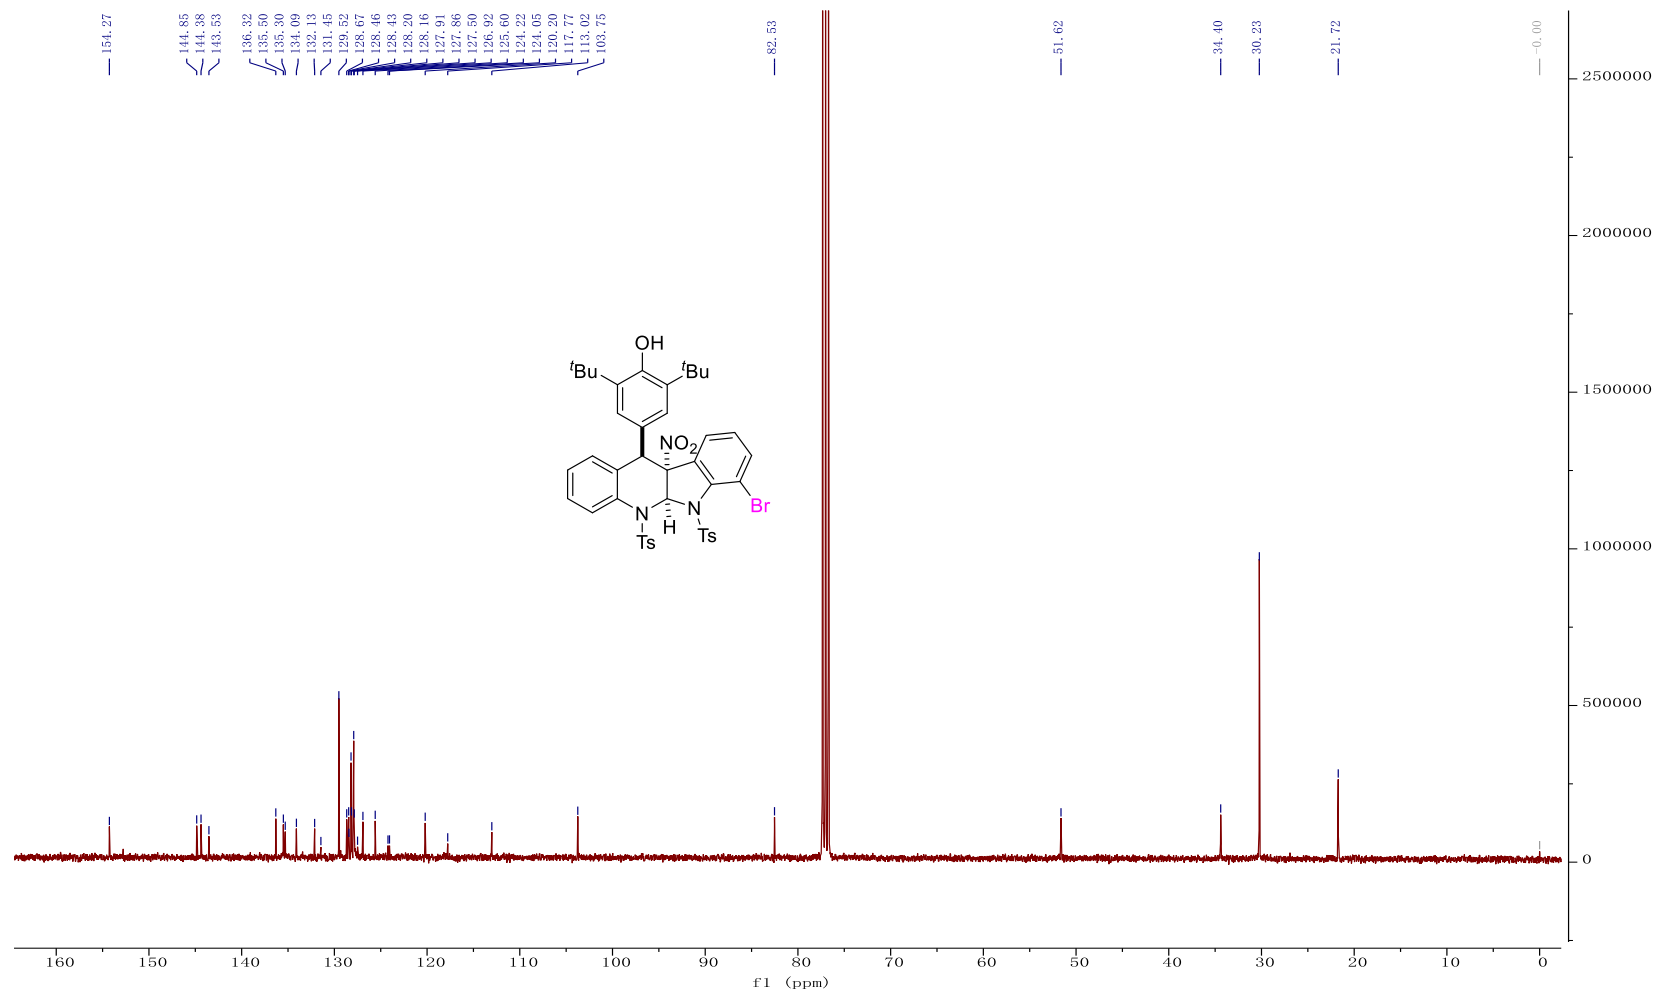

# <sup>1</sup>H NMR spectrum of 3o

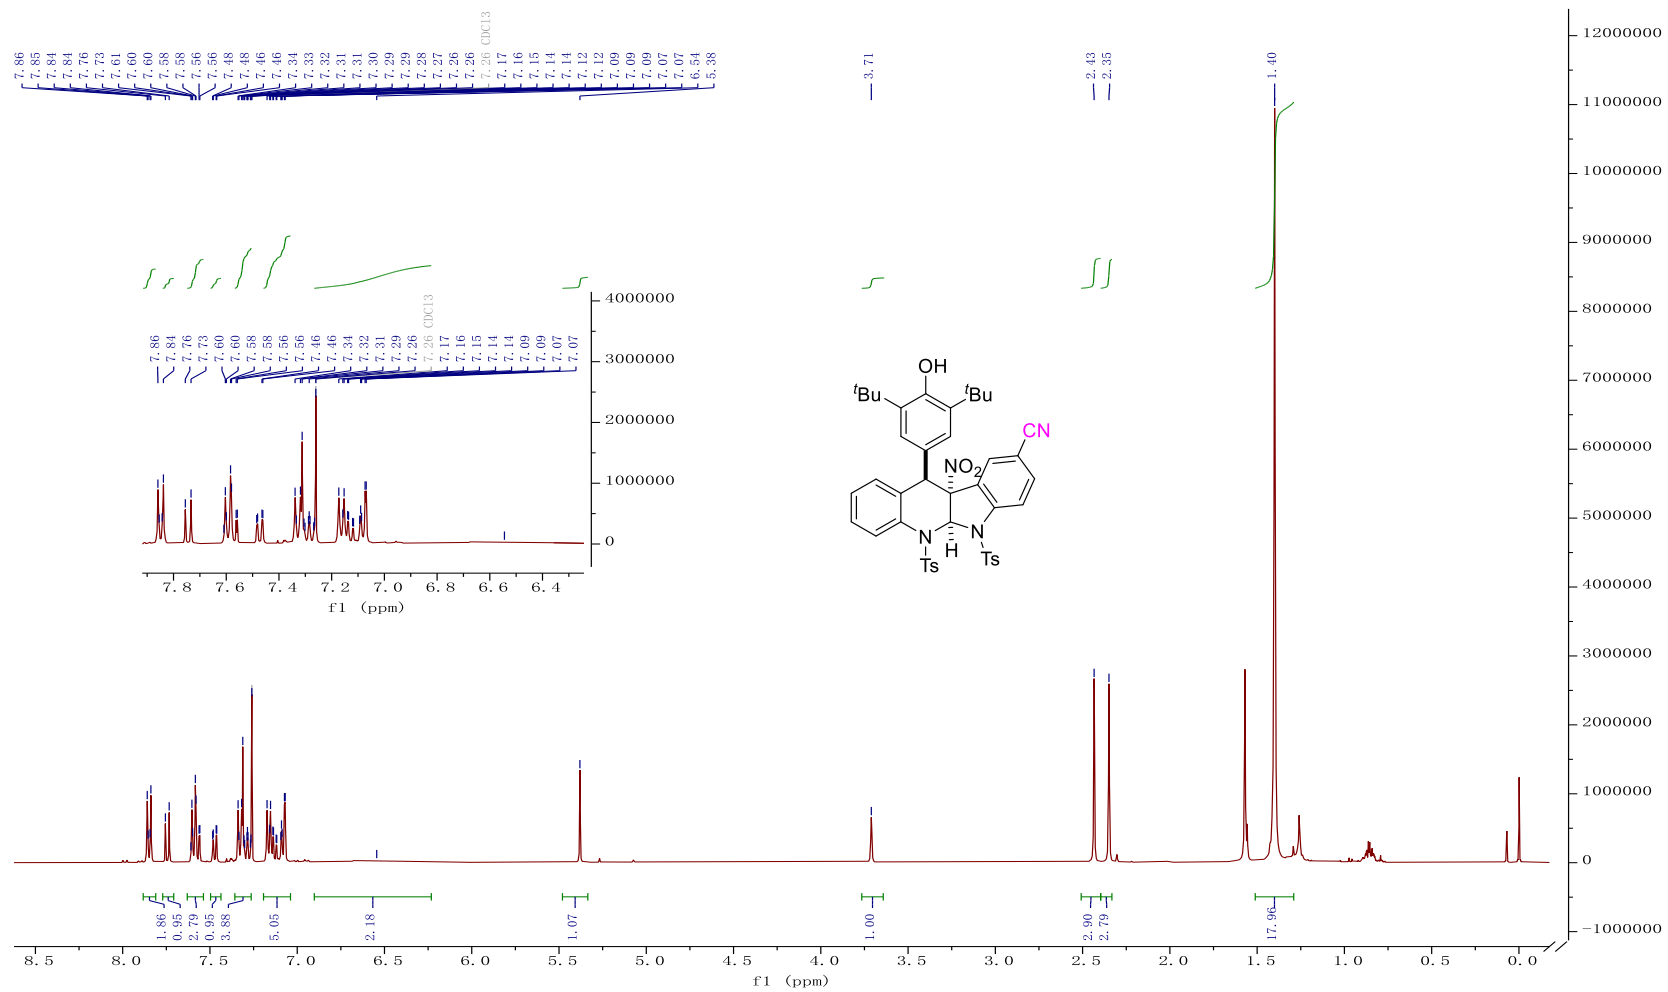

<sup>13</sup>C NMR spectrum of 3o

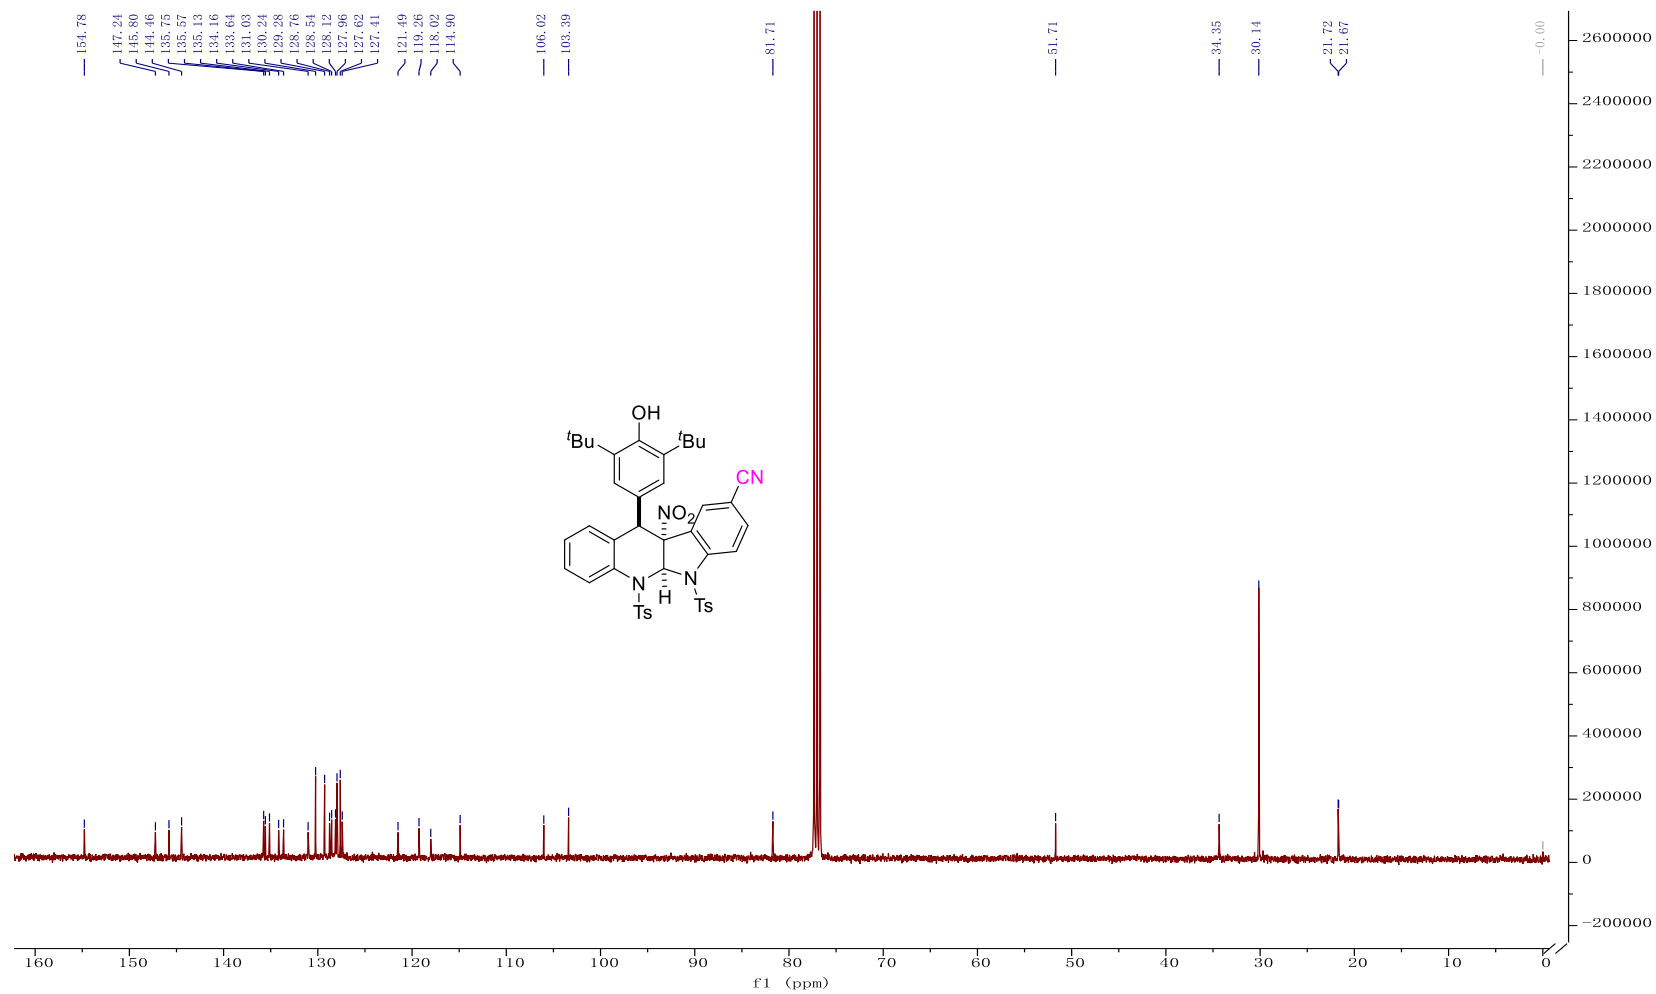

# <sup>1</sup>H NMR spectrum of 3p

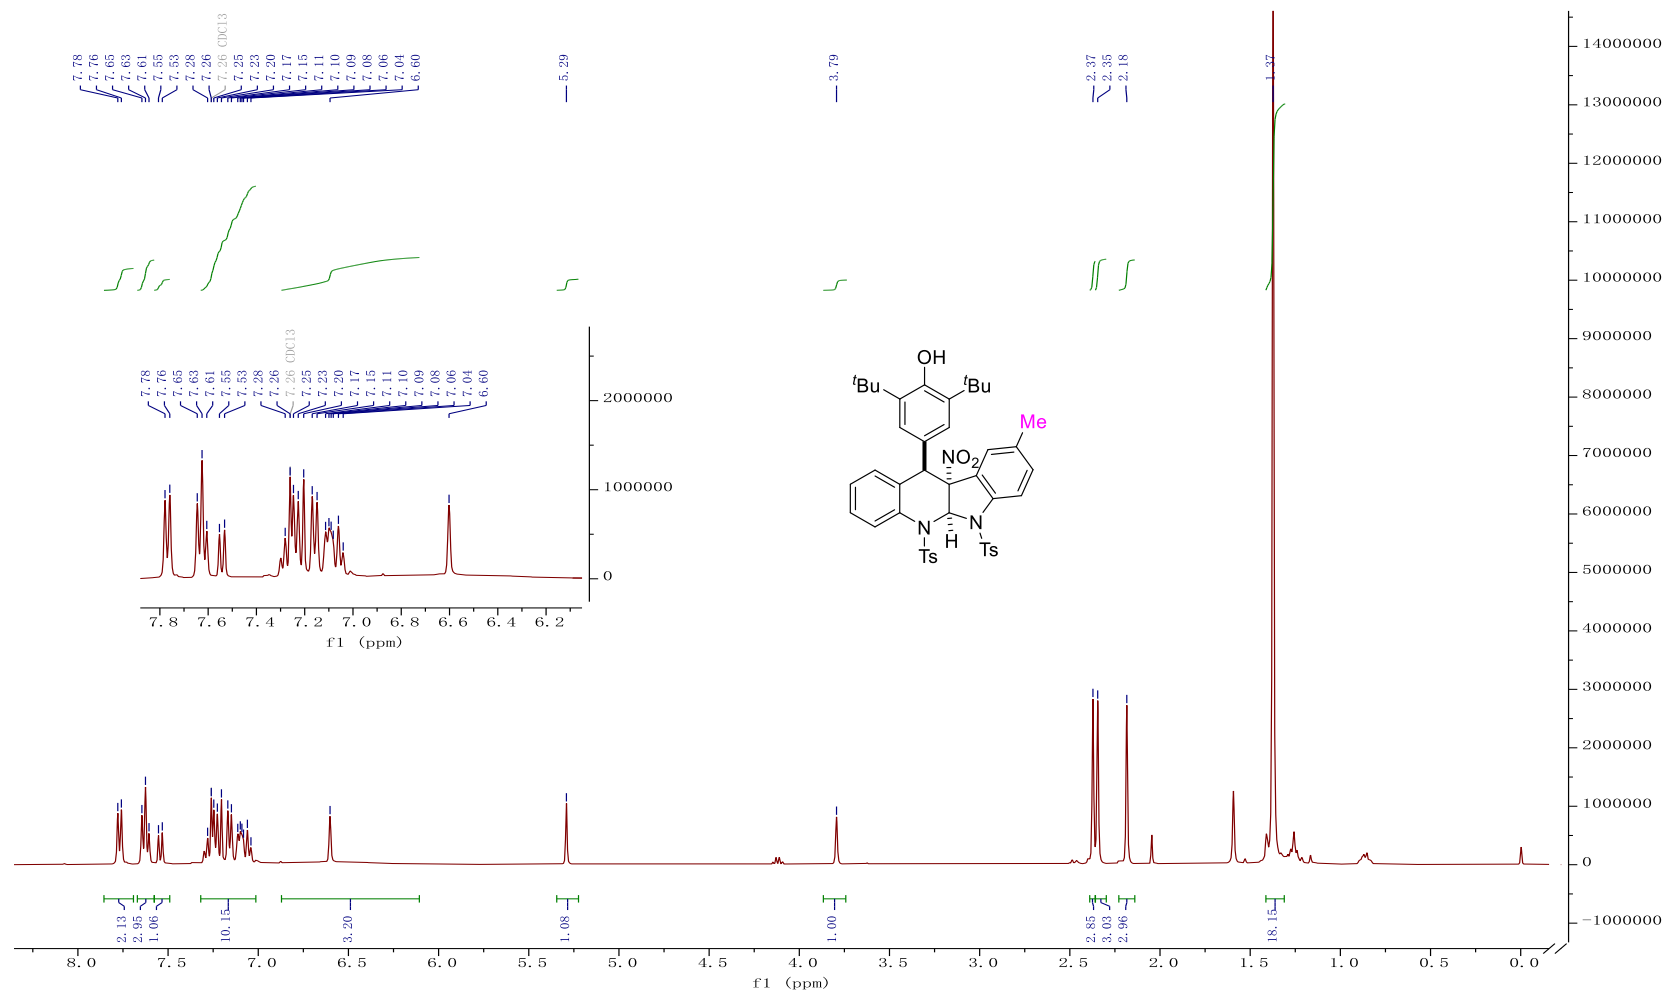



<sup>13</sup>C NMR spectrum of 3p

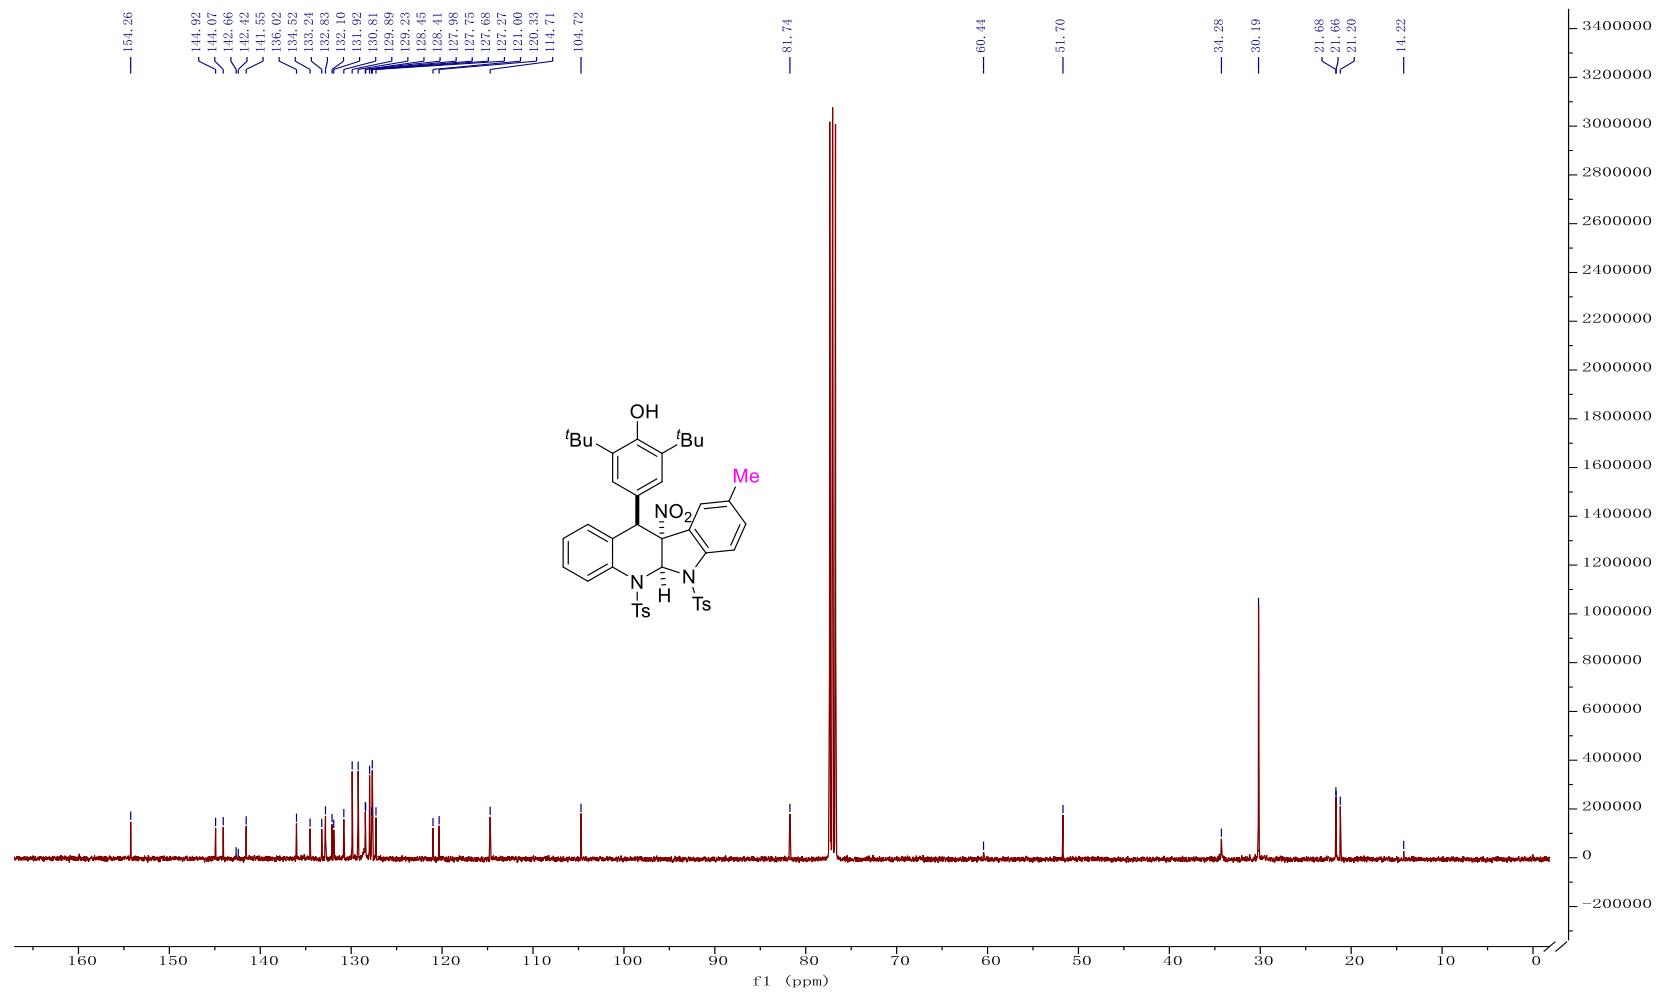

<sup>1</sup>H NMR spectrum of 3q

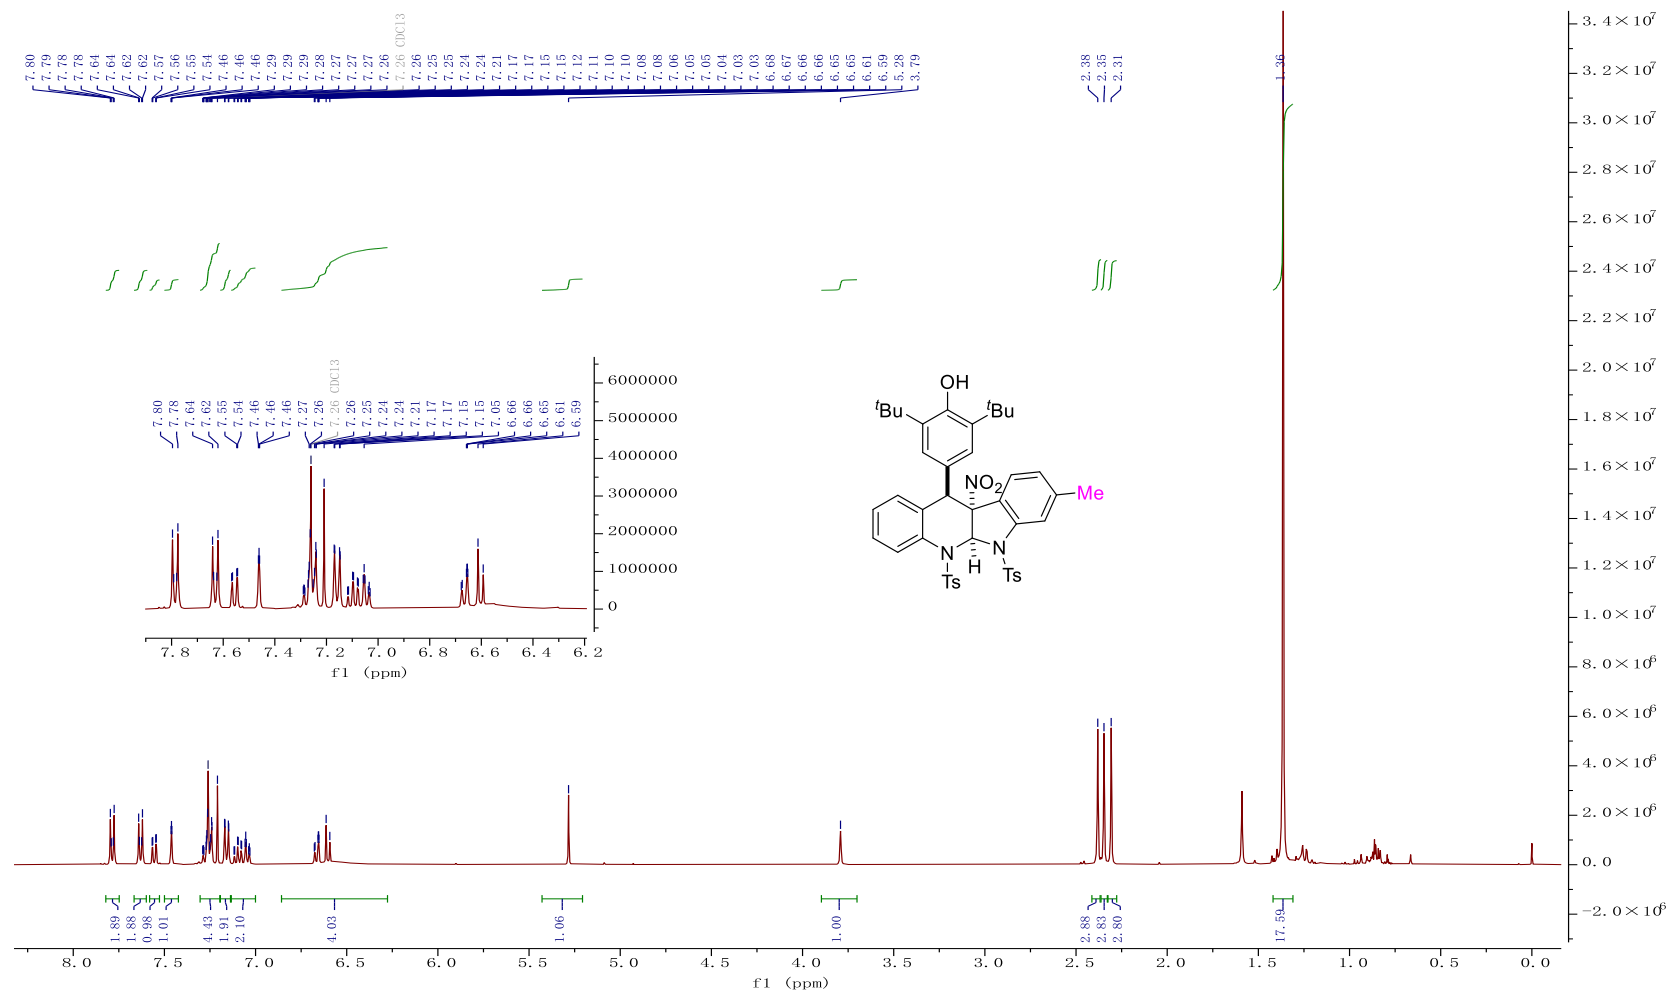

<sup>13</sup>C NMR spectrum of 3q

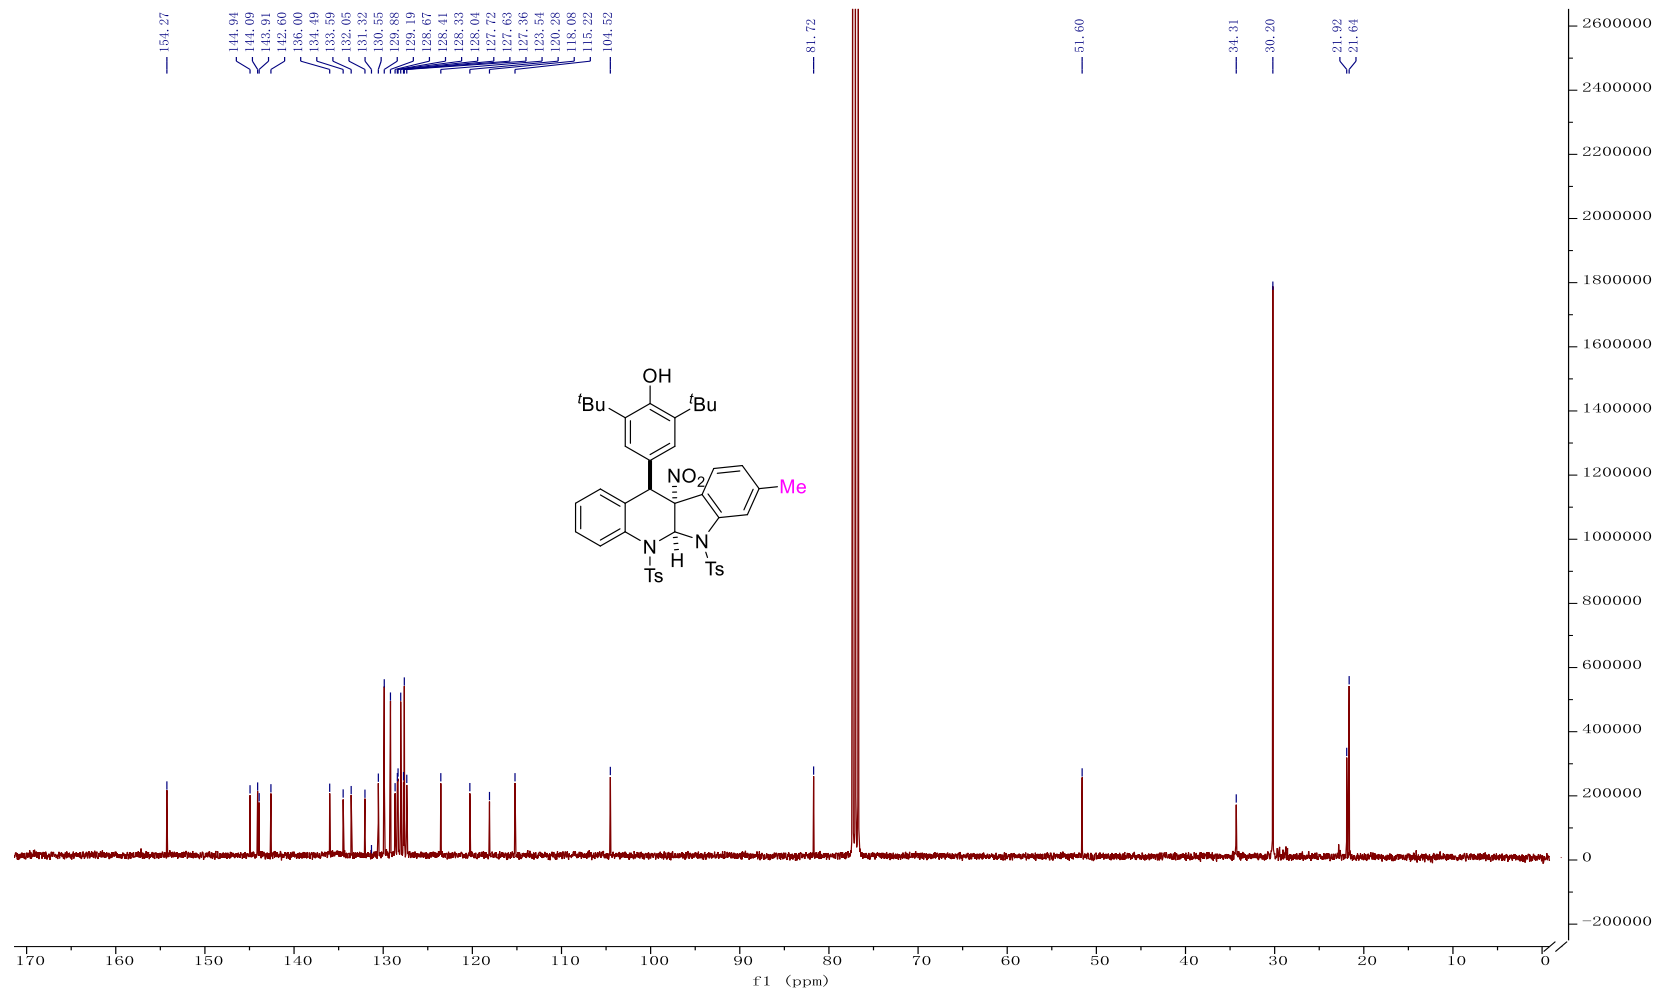

### HPLC spectra of 3q

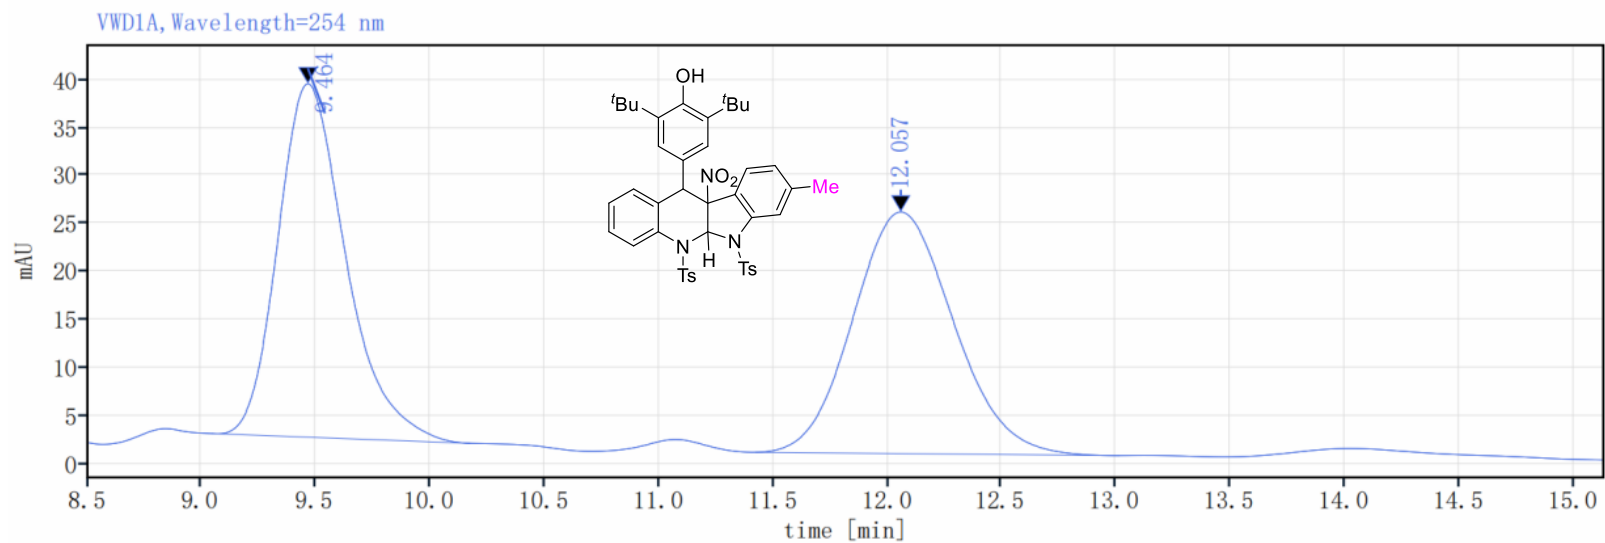

Detector VWD1A, Wavelength=254 nm

| Peak | Ret.Time [min] | Area    | Height | Area%  |
|------|----------------|---------|--------|--------|
|      | 9.464          | 759.40  | 36.77  | 49.70  |
|      | 12.057         | 768.50  | 25.14  | 50.30  |
|      |                | 1527.90 |        | 100.00 |

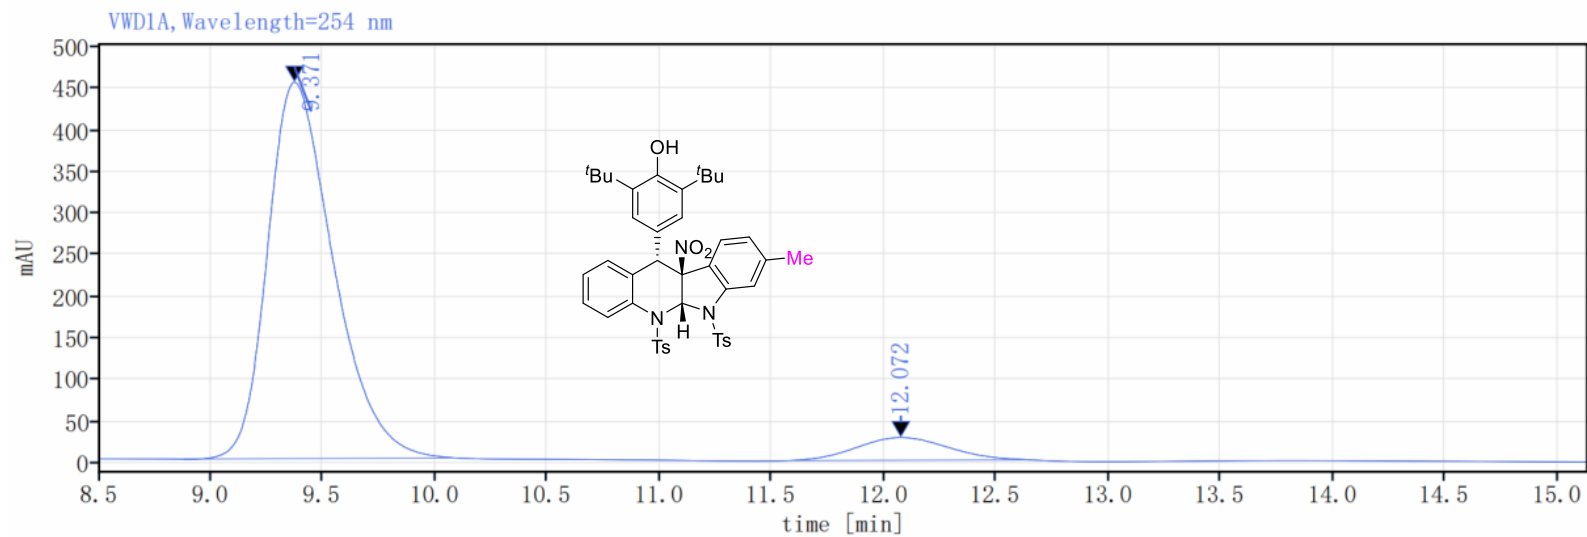

Detector VWD1A, Wavelength=254 nm

| Peak | Ret.Time [min] | Area    | Height | Area%  |
|------|----------------|---------|--------|--------|
|      | 9.371          | 9205.78 | 452.60 | 92.28  |
|      | 12.072         | 769.68  | 27.24  | 7.72   |
|      |                | 9975.46 |        | 100.00 |

# <sup>1</sup>H NMR spectrum of 3r

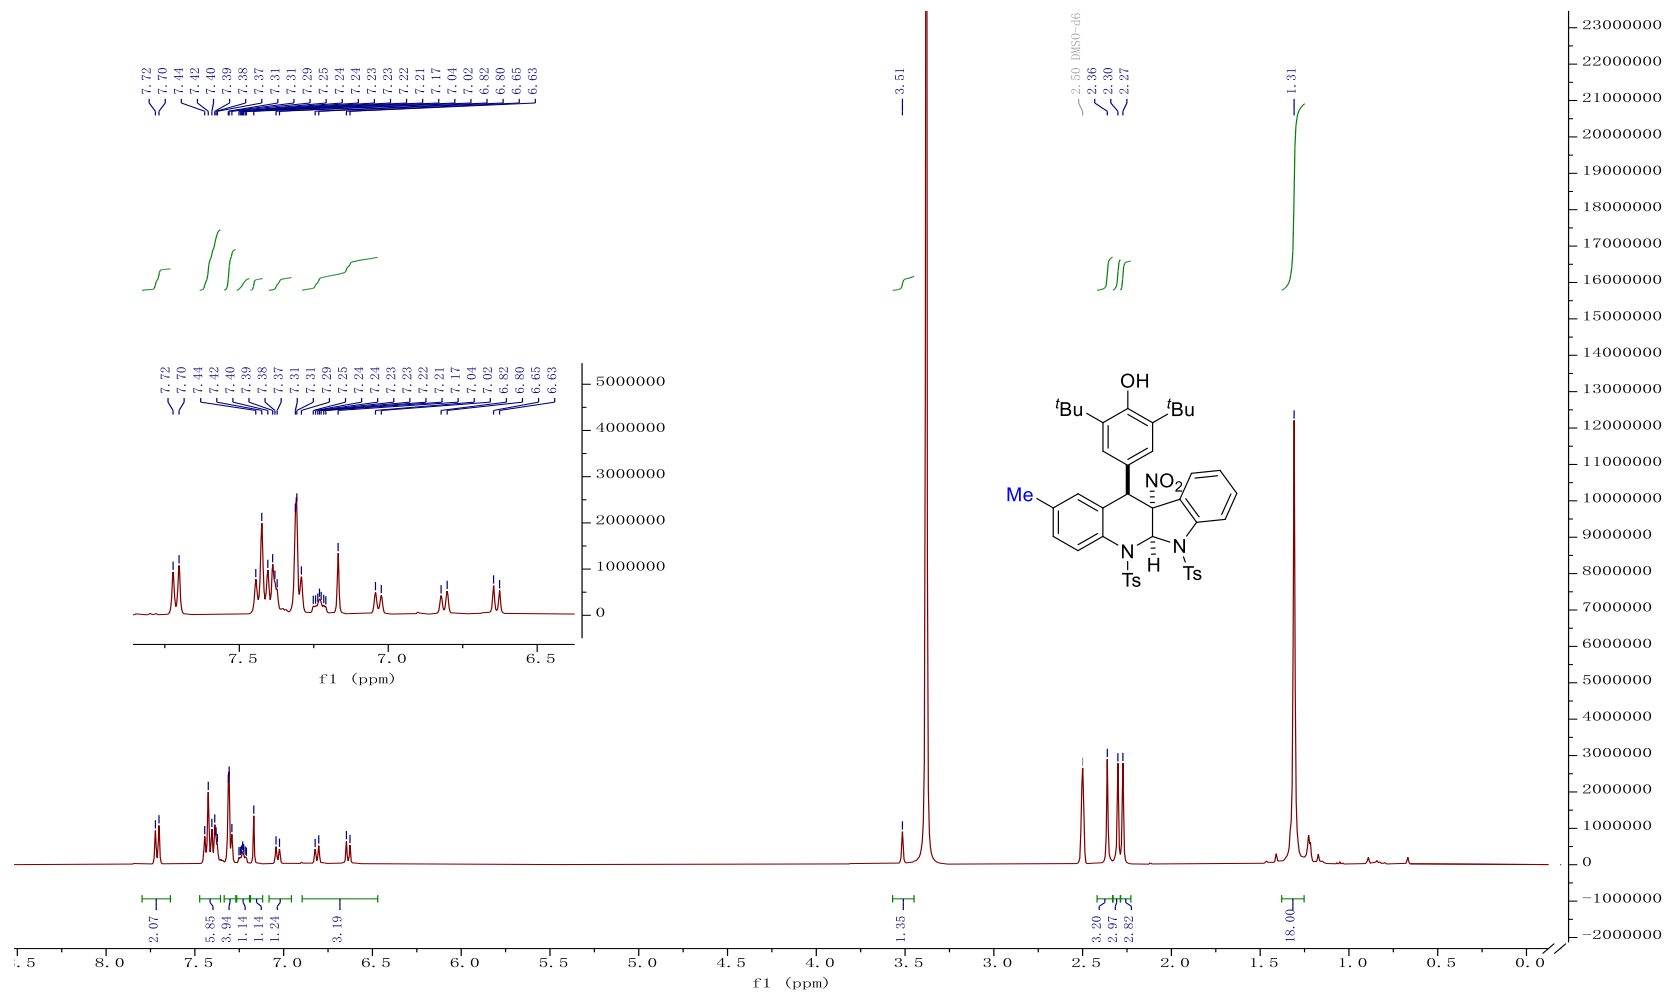

### <sup>13</sup>C NMR spectrum of 3r

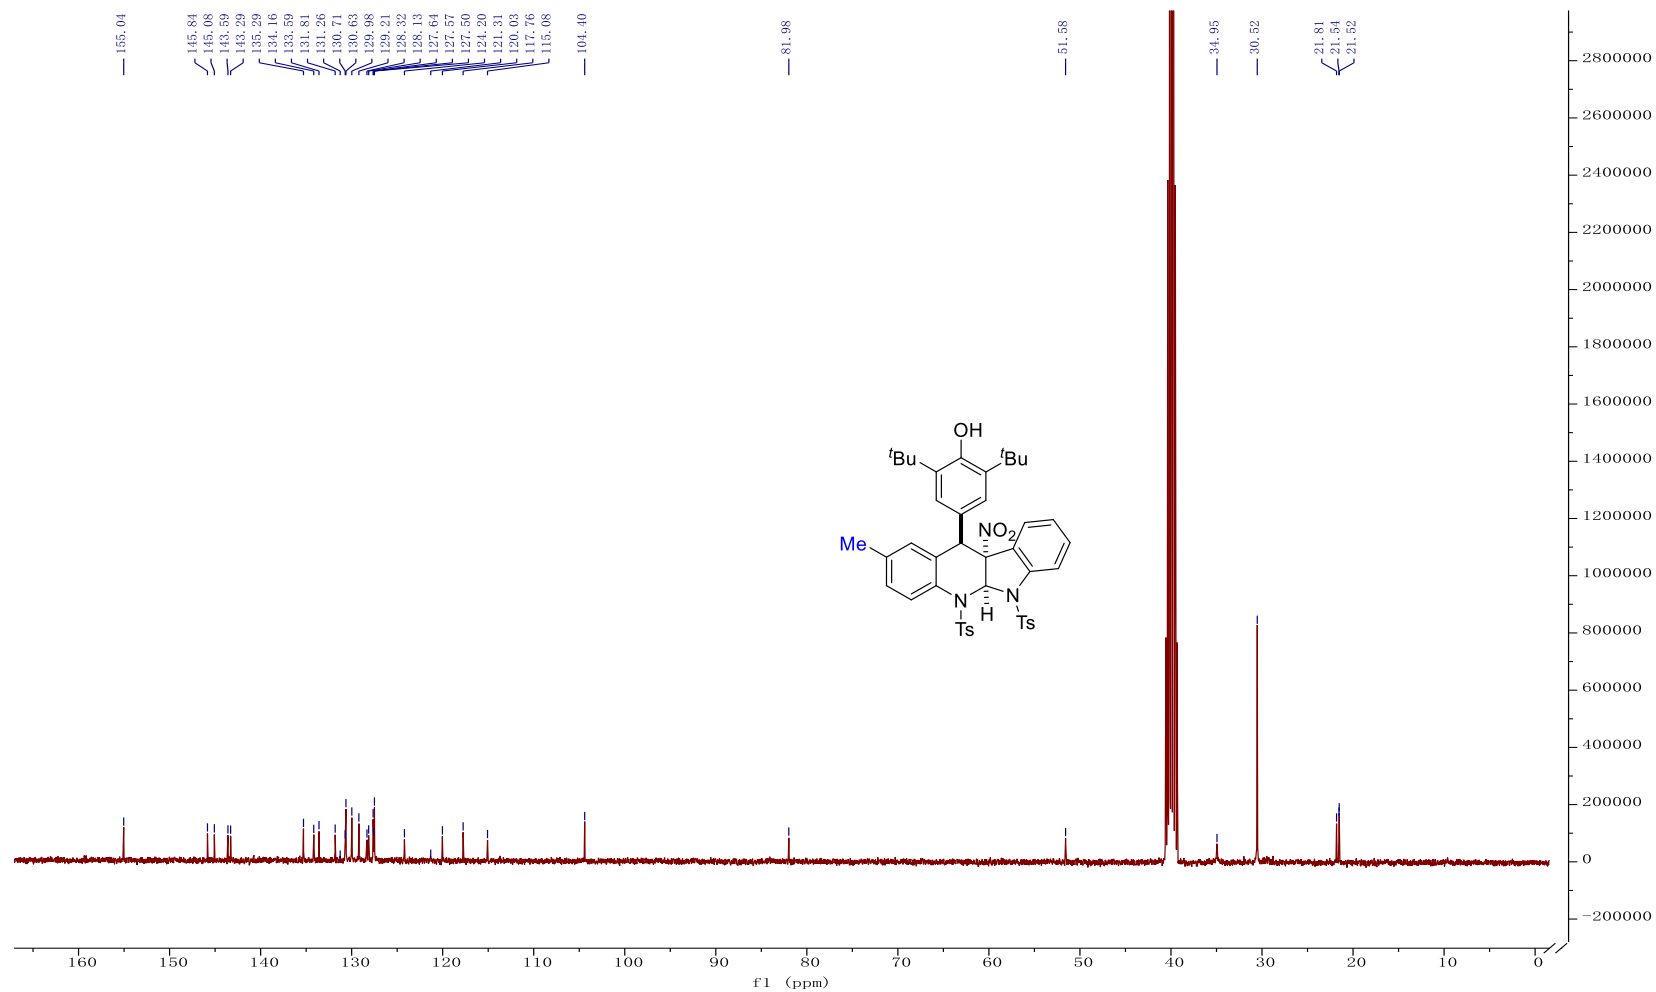

# <sup>1</sup>H NMR spectrum of 3s

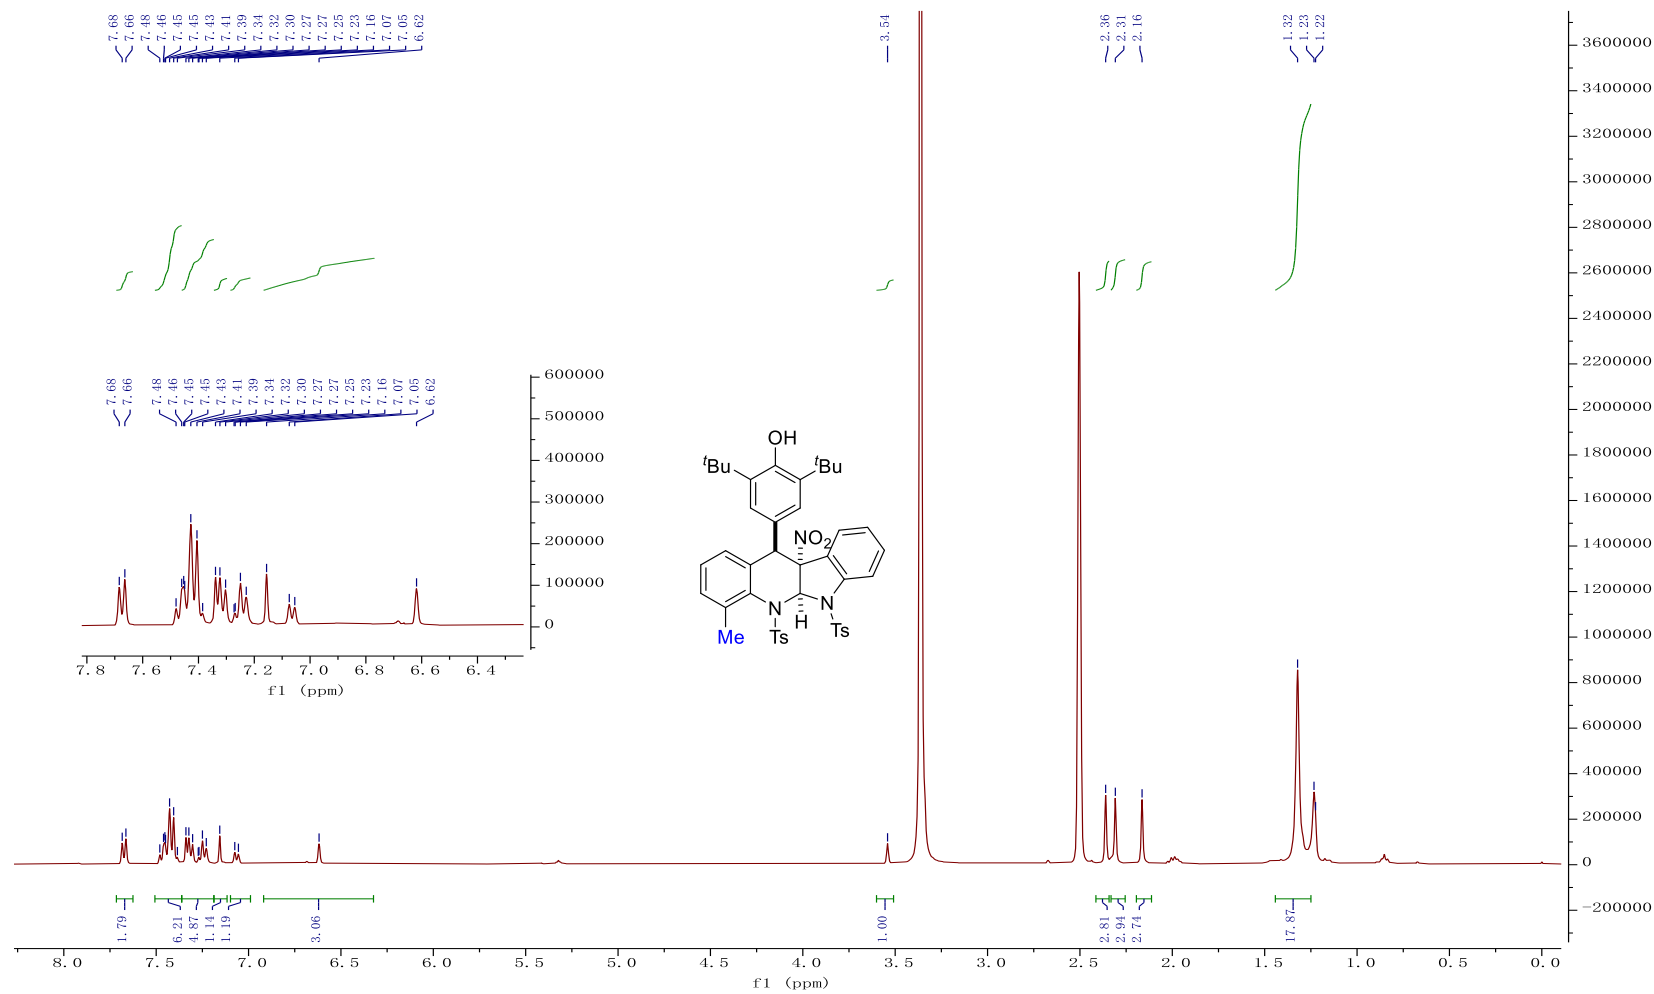



### <sup>13</sup>C NMR spectrum of 3s

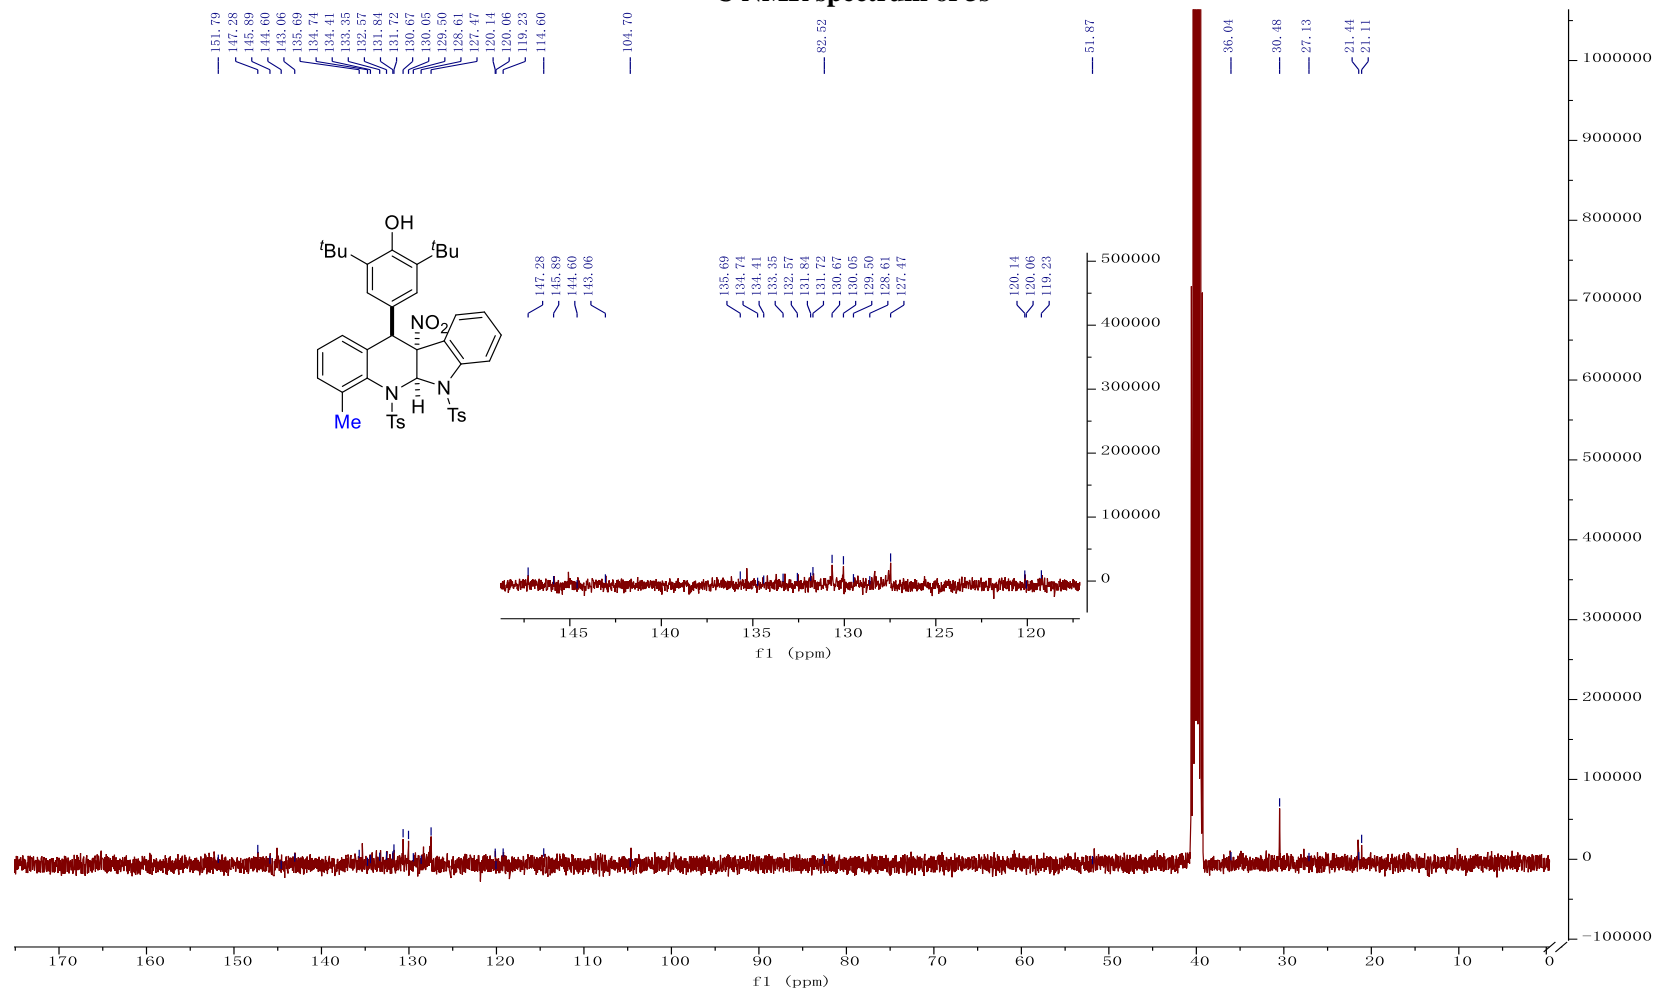

<sup>1</sup>H NMR spectrum of compound 4

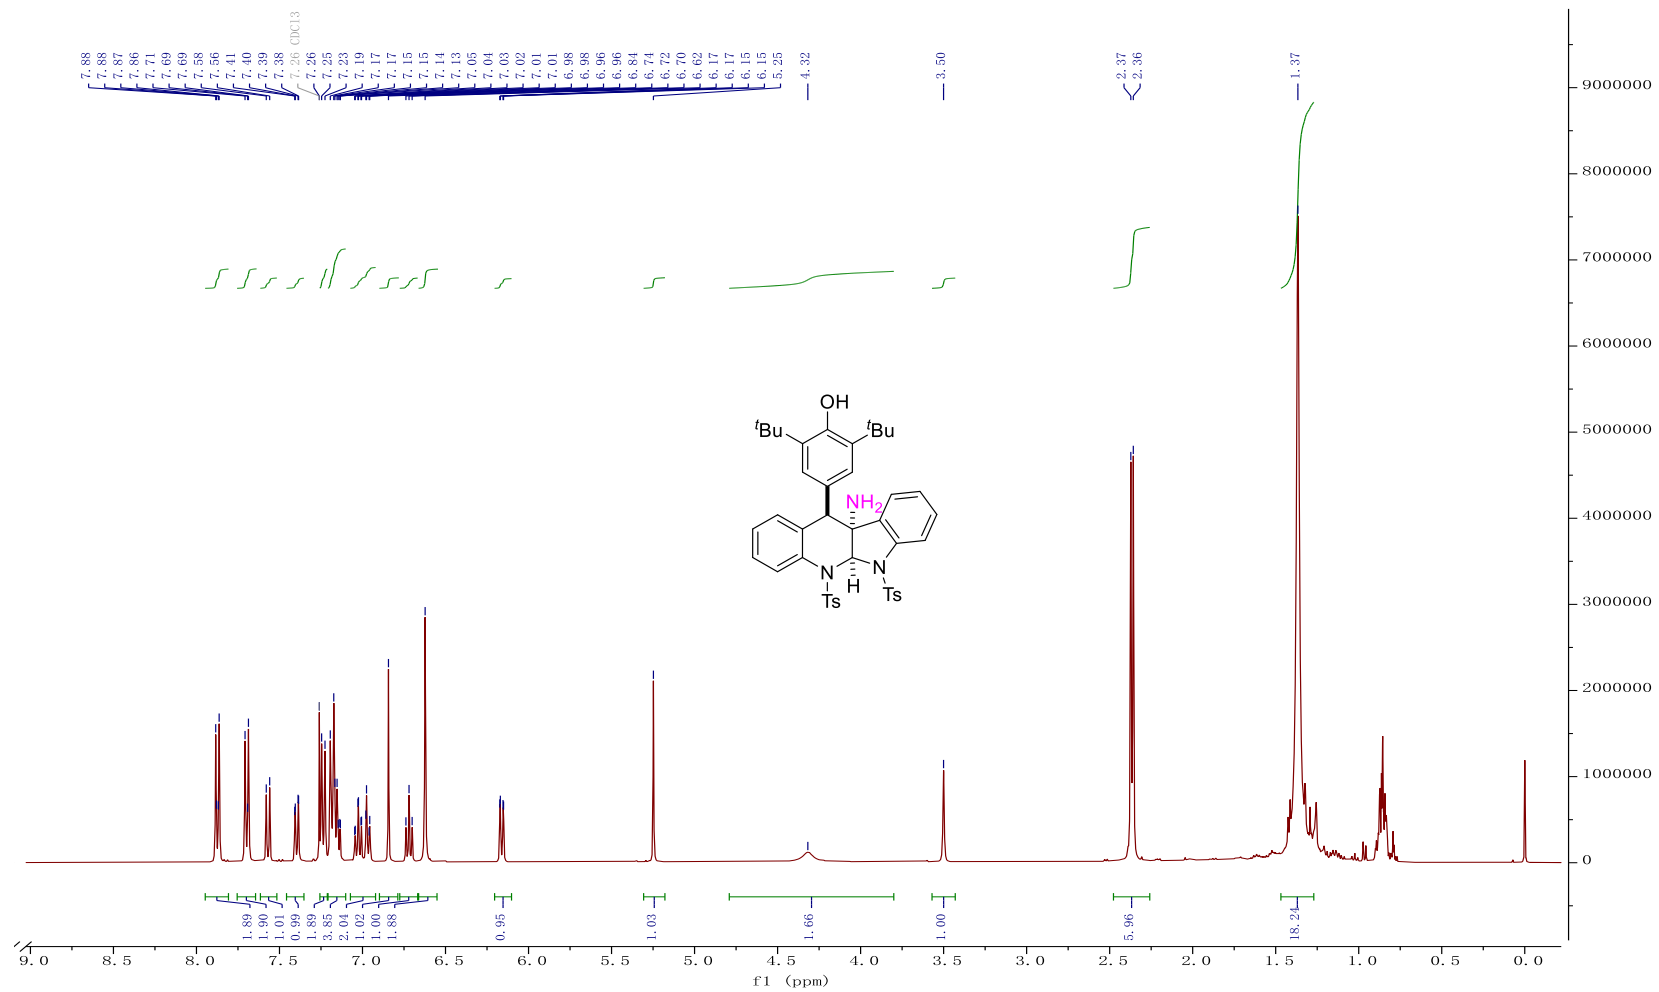

### <sup>13</sup>C NMR spectrum of compound 4

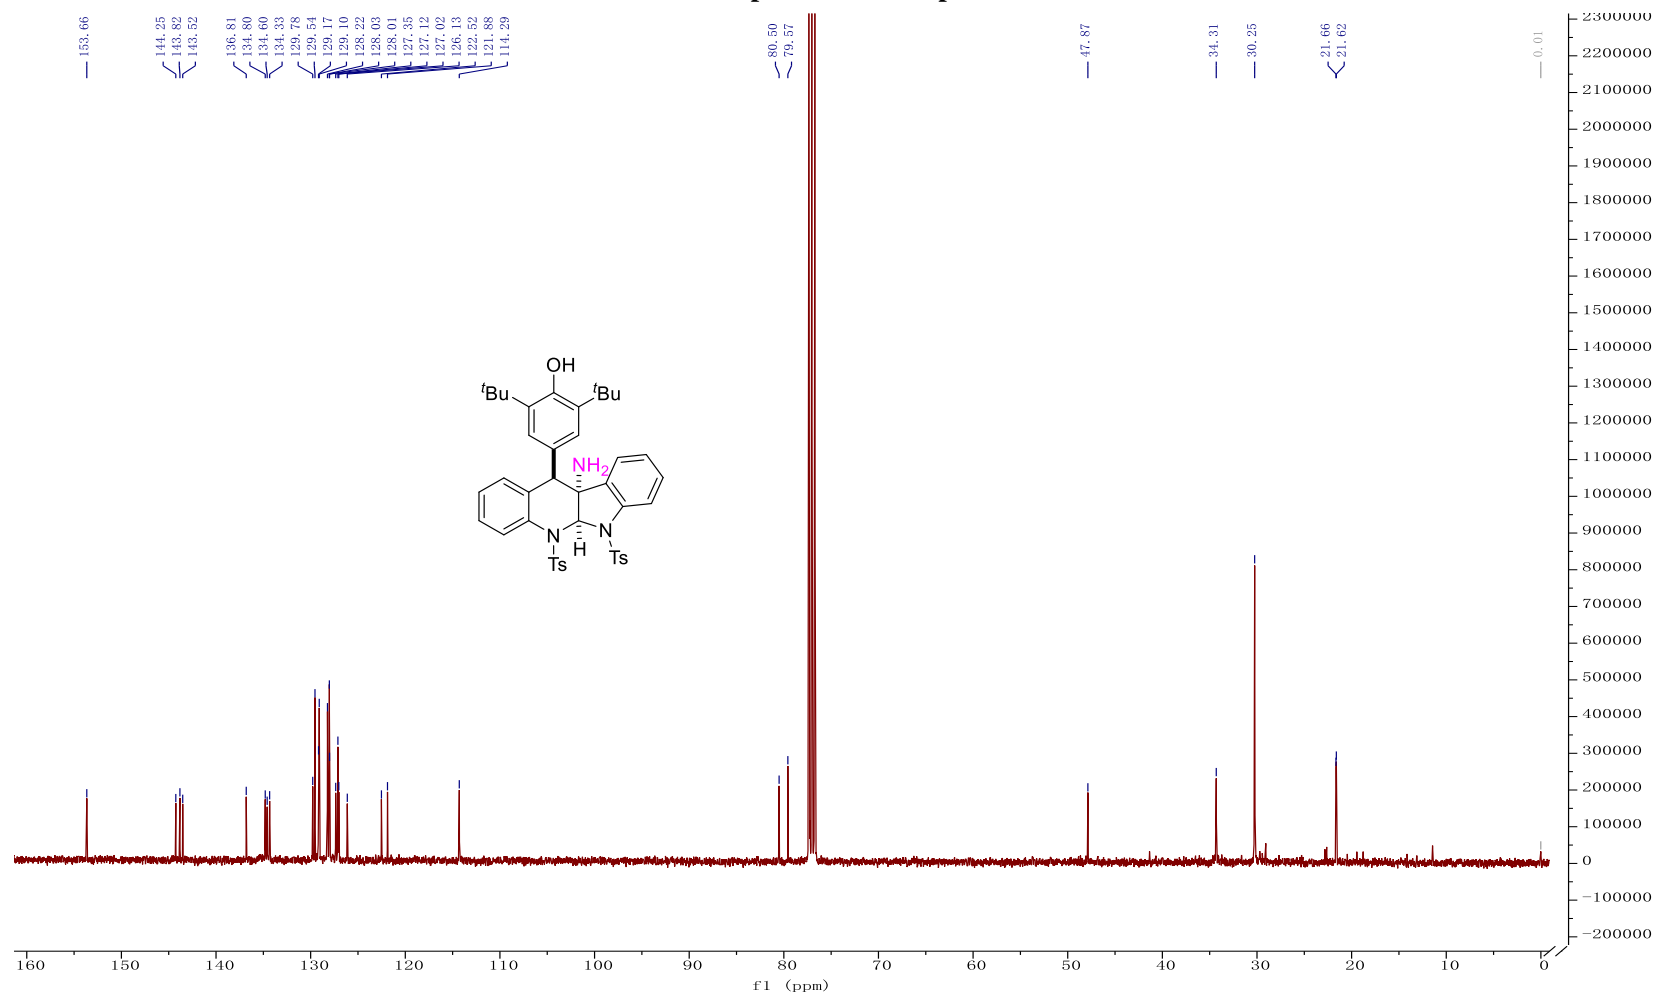

Supplement: d2ob02303b1.pdf [file d2ob02303b1.pdf]
